# Supplementary material for: Large-scale deep multi-layer analysis of Alzheimer’s disease brain reveals strong proteomic disease-related changes not observed at the RNA level
Source: PubMed Central journal article supplement (PMC8825285; doi:10.1038/s41593-021-00999-y), 2022-02-03
Supplement: 41593_2021_999_MOESM1_ESM.pdf [file 41593_2021_999_MOESM1_ESM.pdf]

---

**Supplementary information**

---

**Large-scale deep multi-layer analysis of Alzheimer's disease brain reveals strong proteomic disease-related changes not observed at the RNA level**

---

In the format provided by the authors and unedited

# Ontology Types

- Biological Process
- Molecular Function
- Cellular Component

**M1 turquoise**

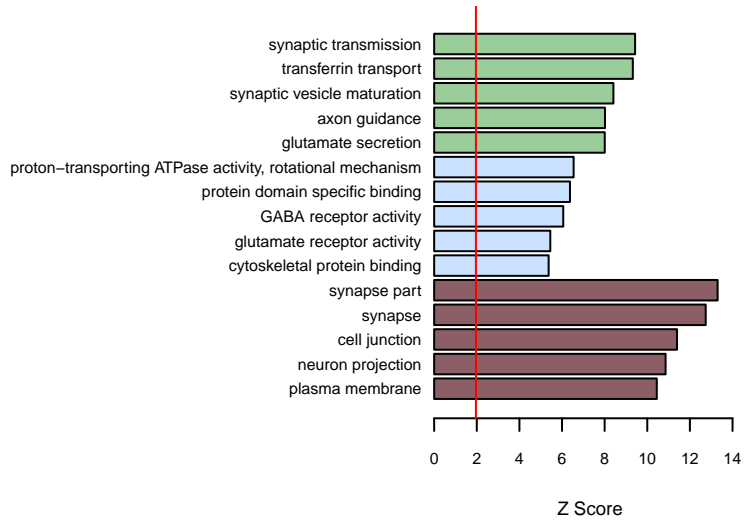

**M2 blue**

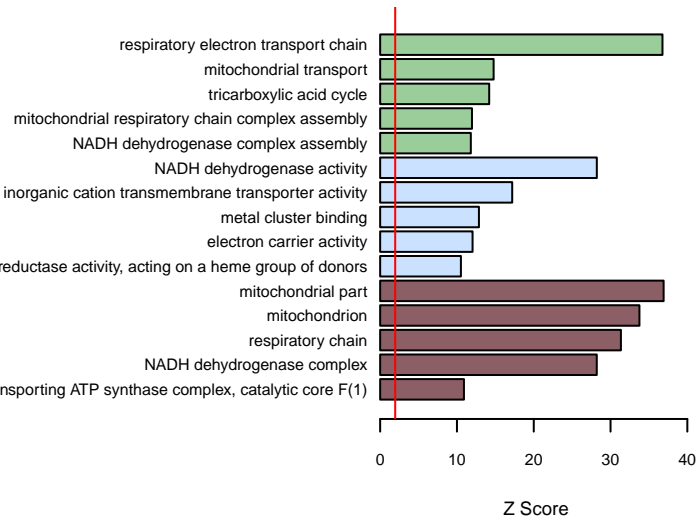

**M3 brown**

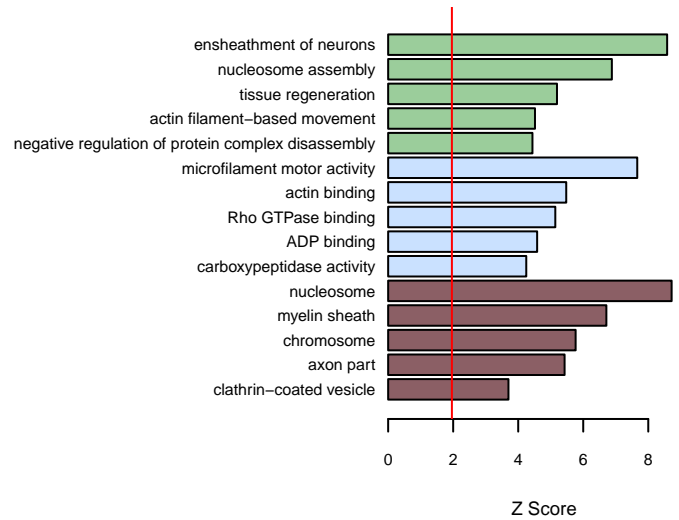

**M4 yellow**

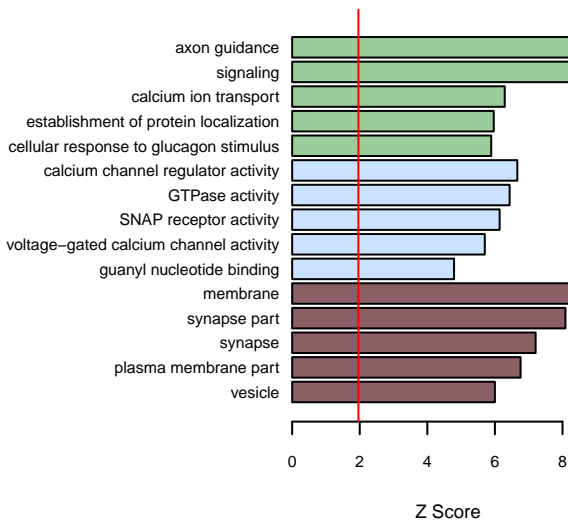

**M5 green**

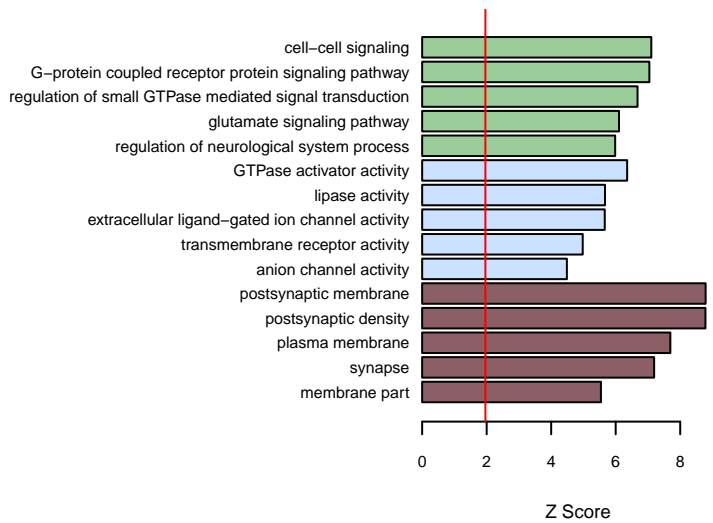

**M6 red**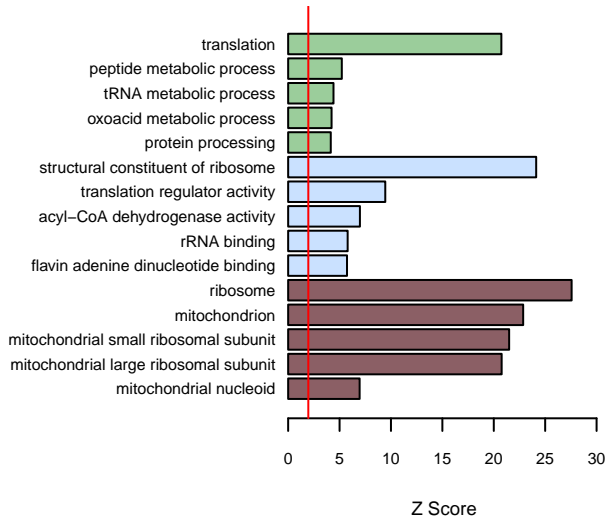**M7 black**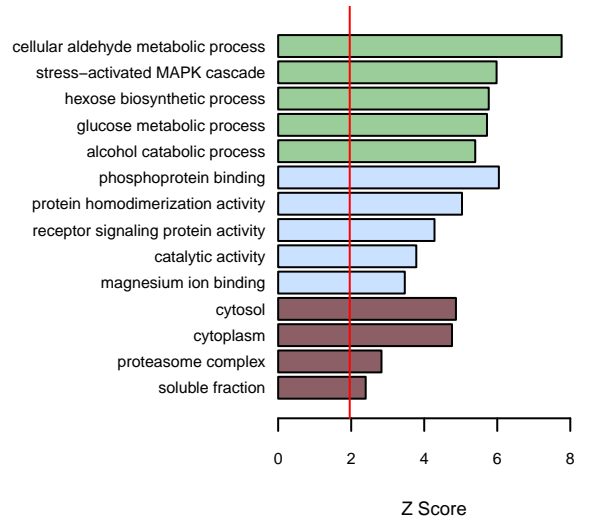**M8 pink**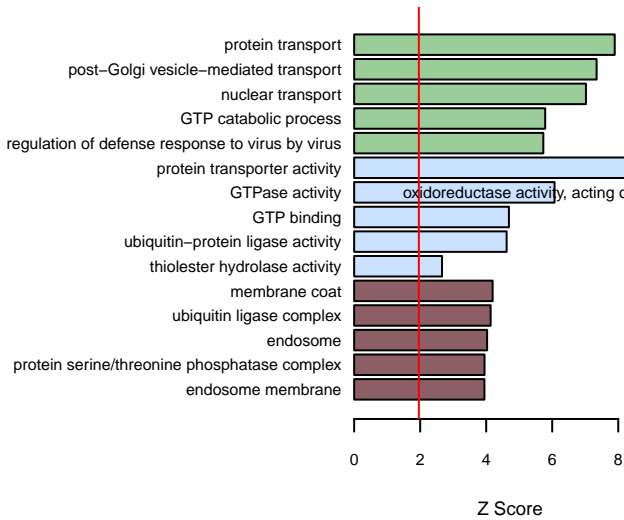**M9 magenta**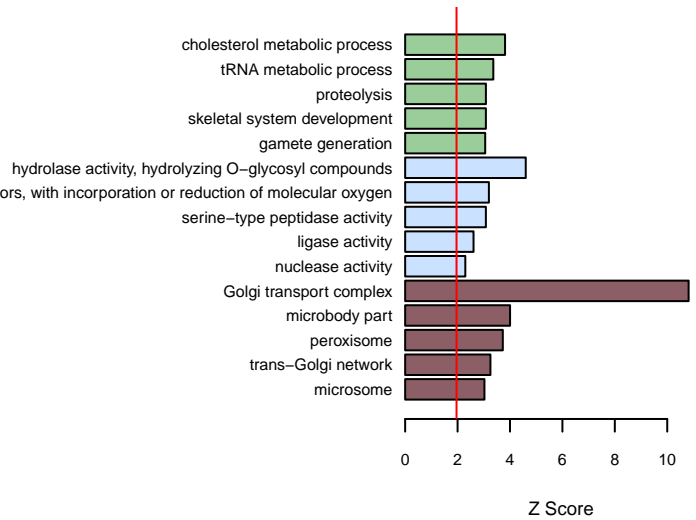**M10 purple**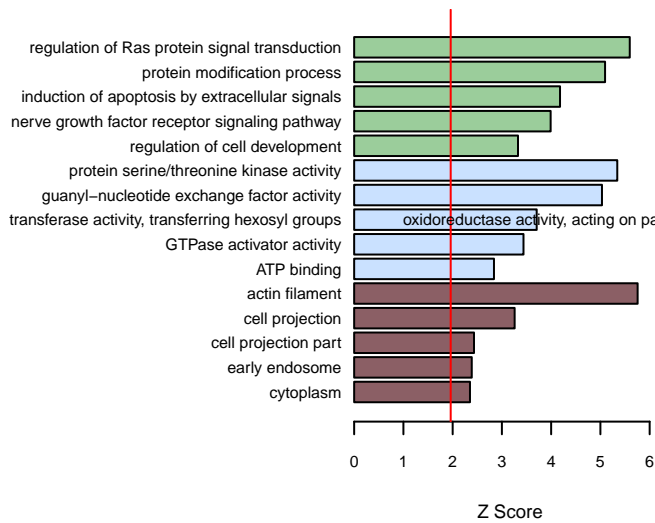**M11 greenyellow**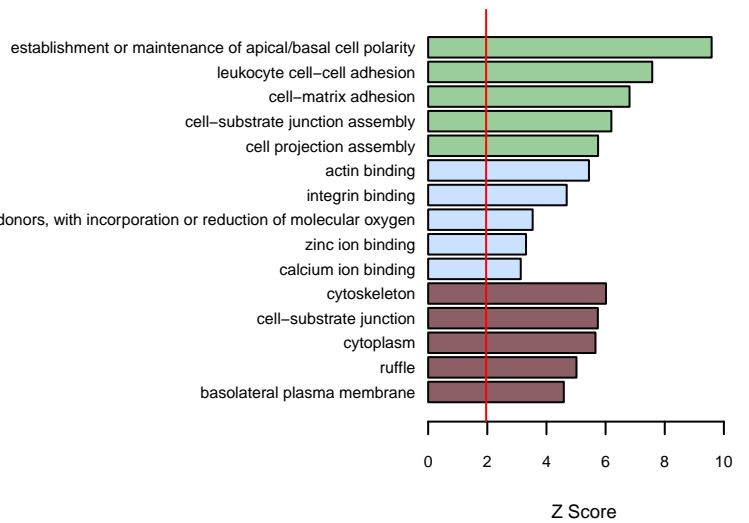

**M12 tan**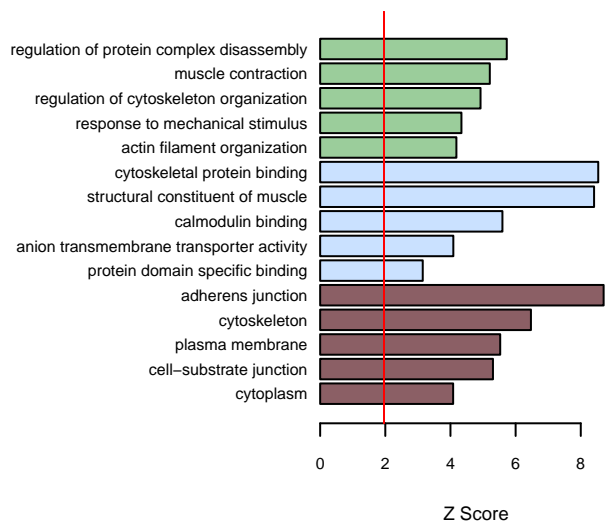**M13 salmon**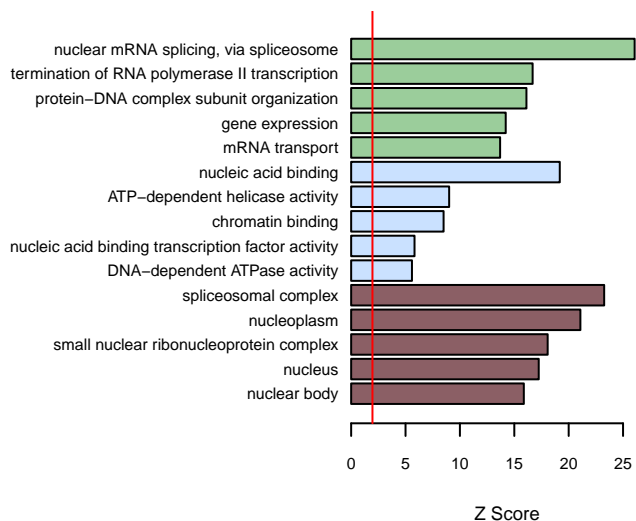**M14 cyan**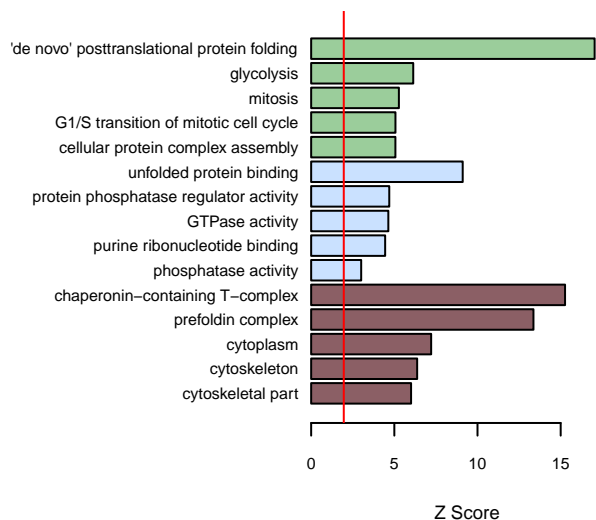**M15 midnightblue**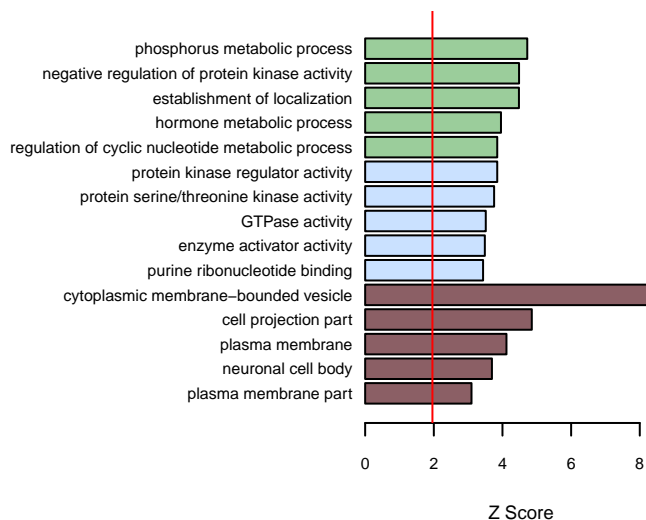**M16 lightcyan**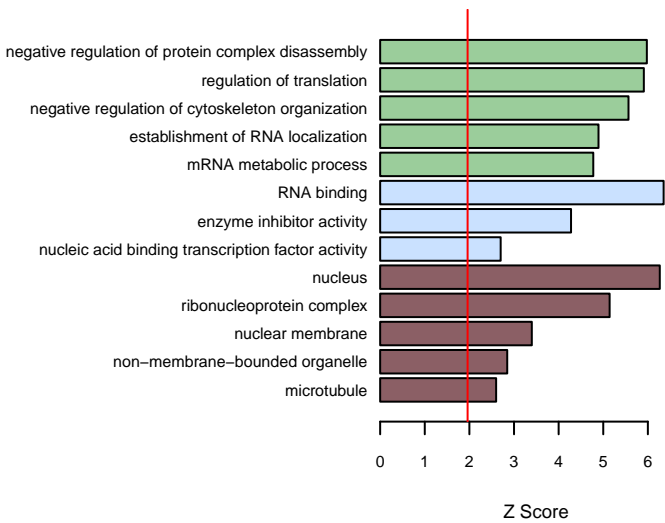**M17 grey60**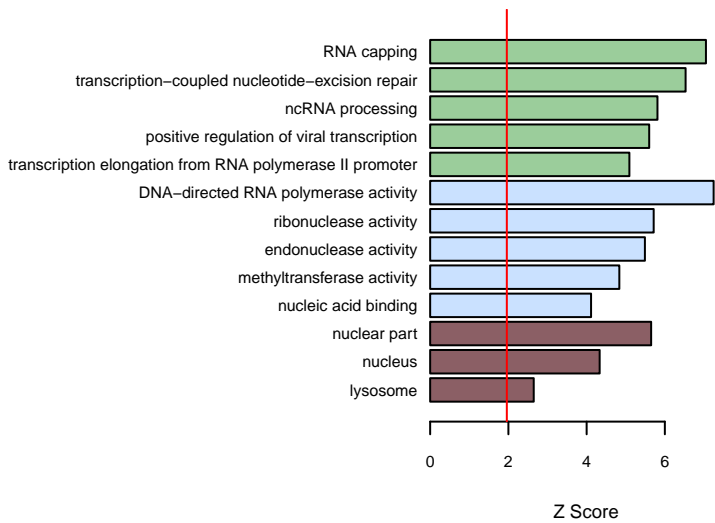

**M18 lightgreen**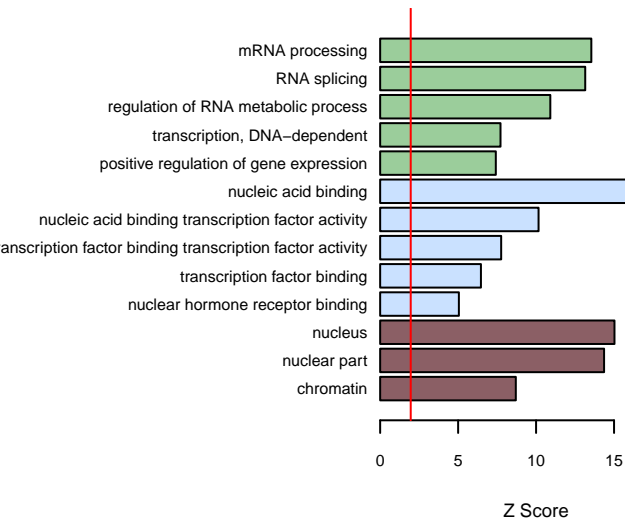**M19 lightyellow**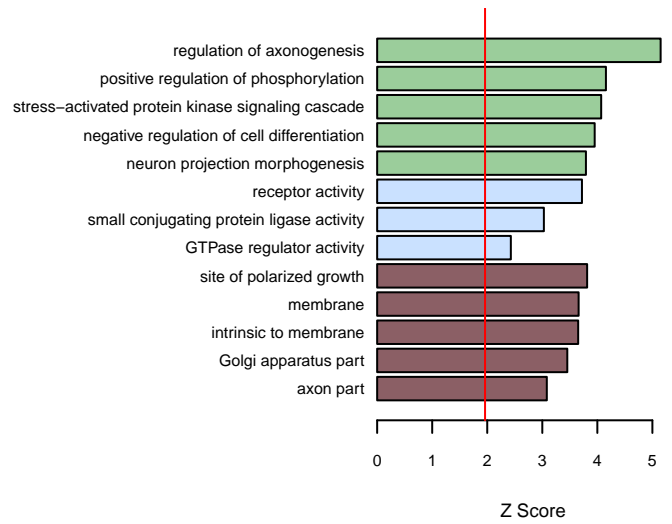**M20 royalblue**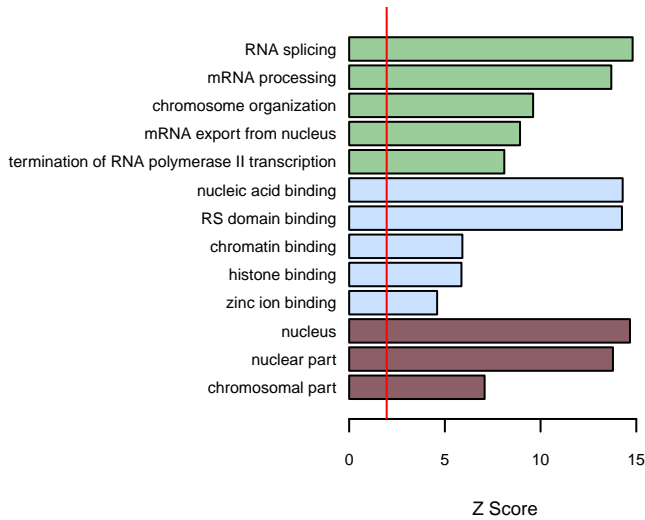**M21 darkred**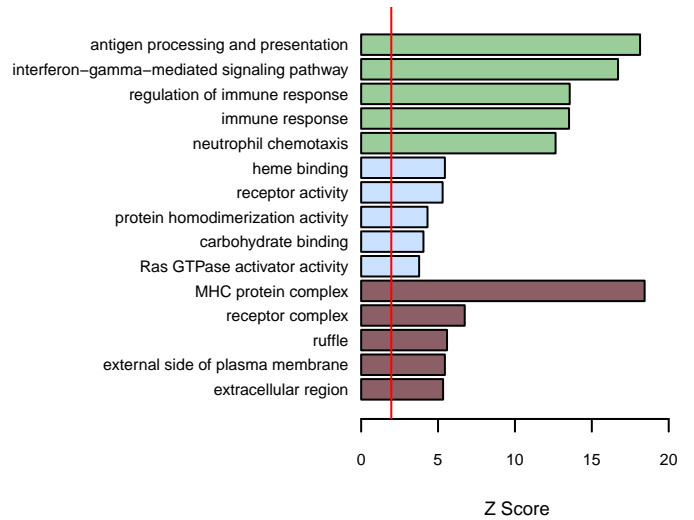**M22 darkgreen**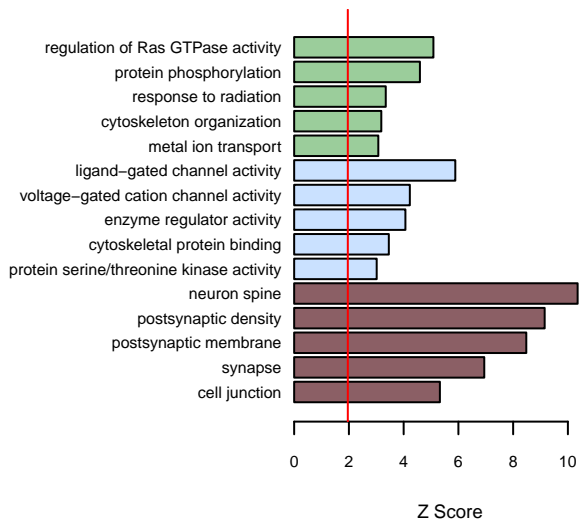**M23 darkturquoise**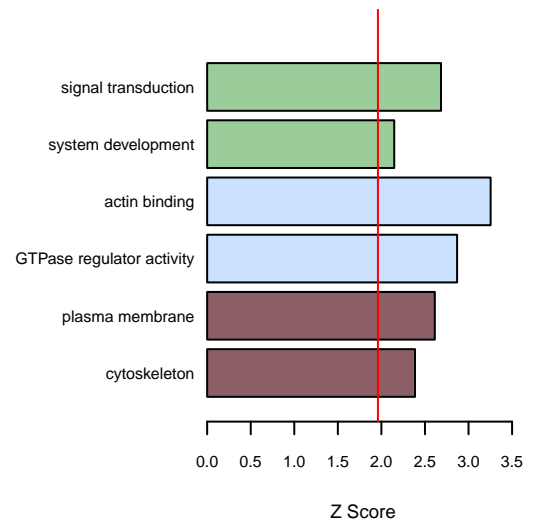

**M24 darkgrey**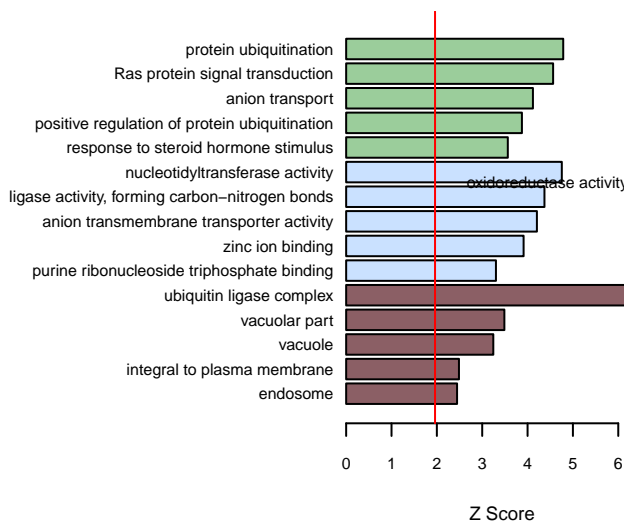**M25 orange**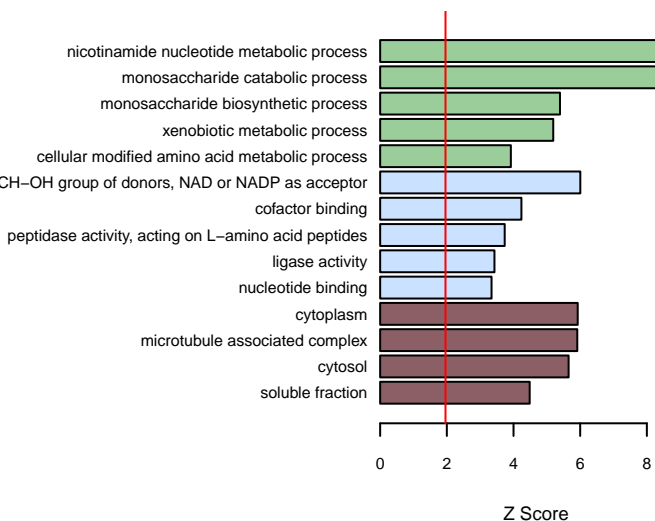**M26 darkorange**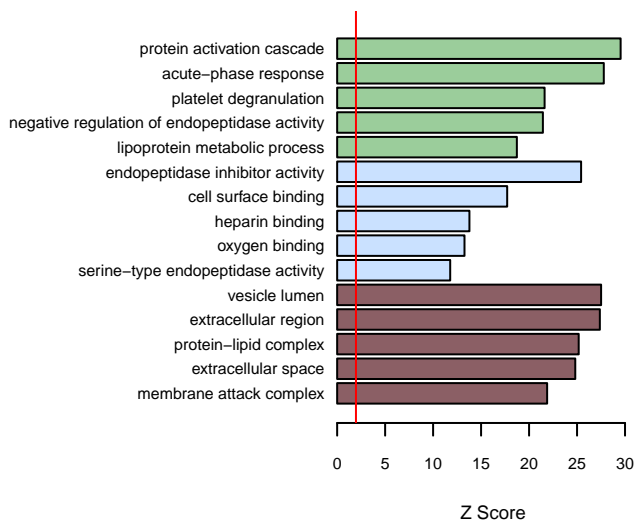**M27 white**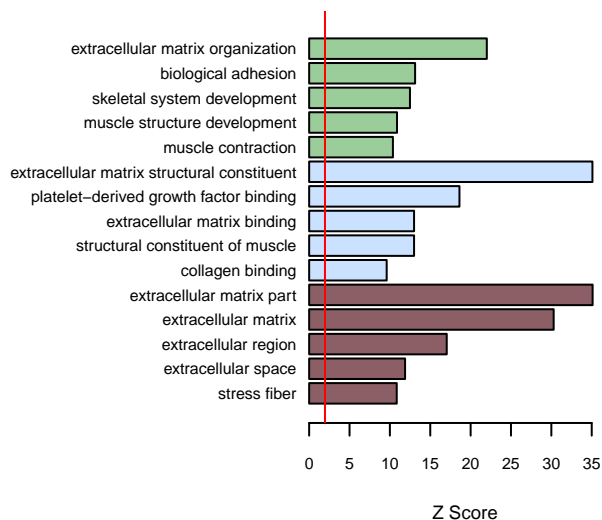**M28 skyblue**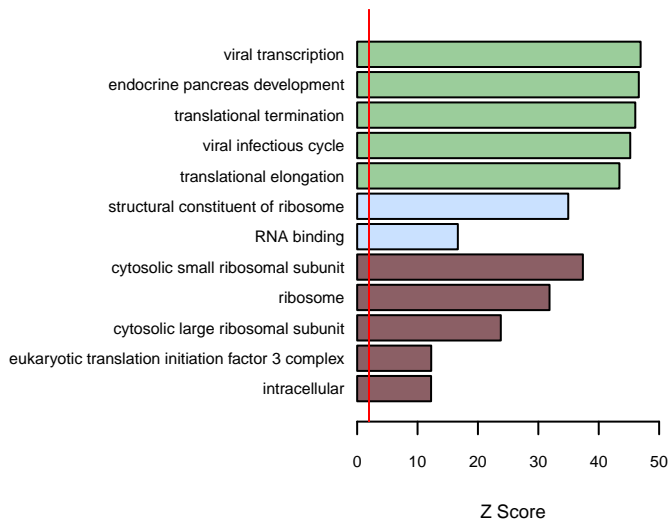**M29 saddlebrown**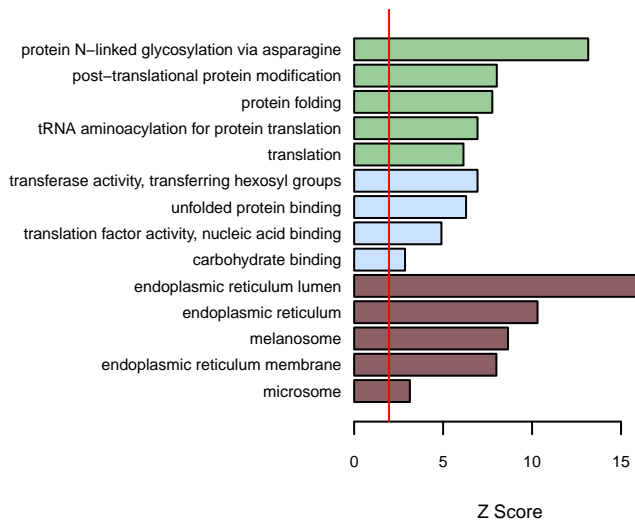

**M30 steelblue**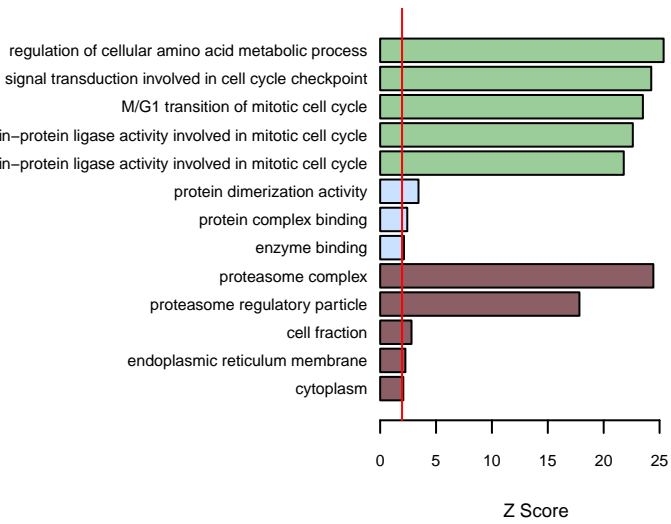**M31 paleturquoise**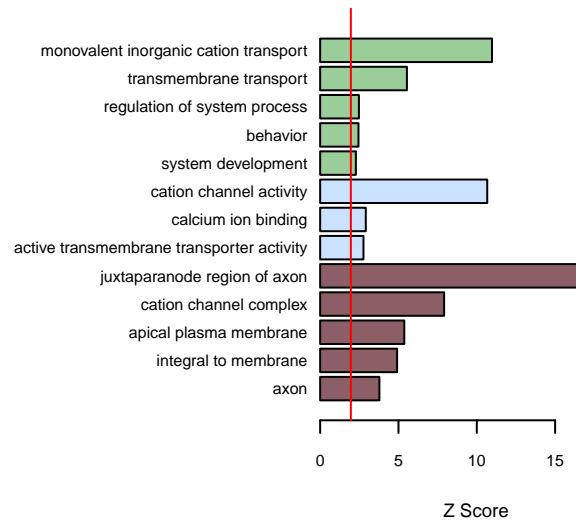**M32 violet**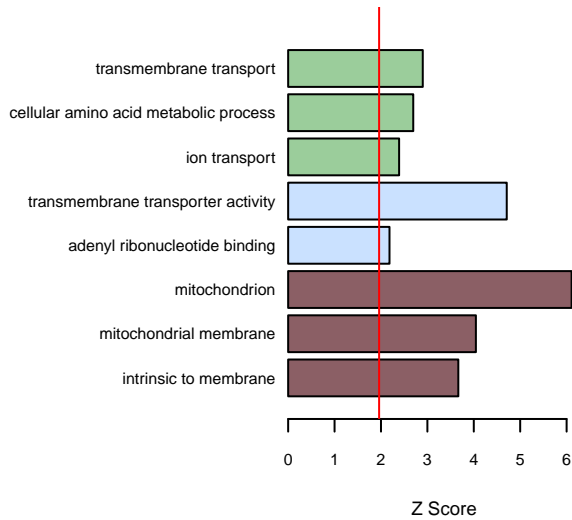**M33 darkolivegreen**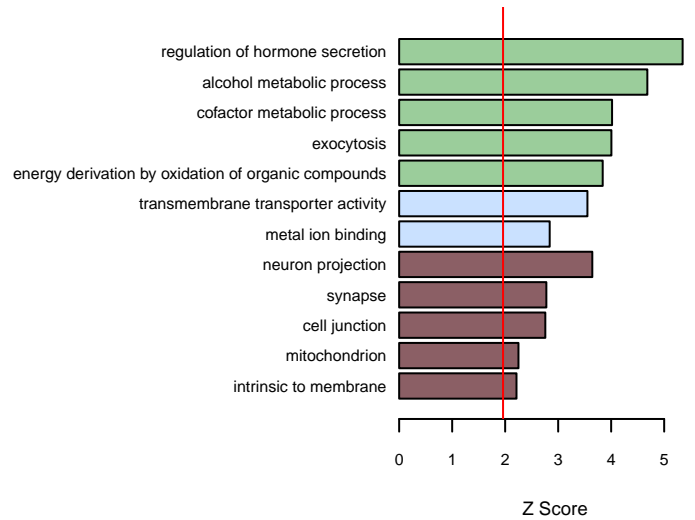**M34 darkmagenta**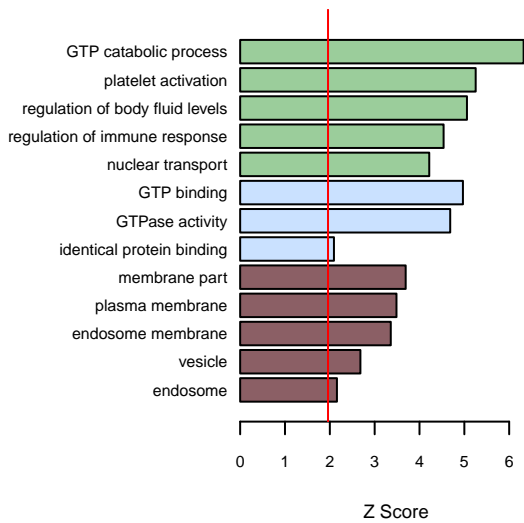**M35 sienna3**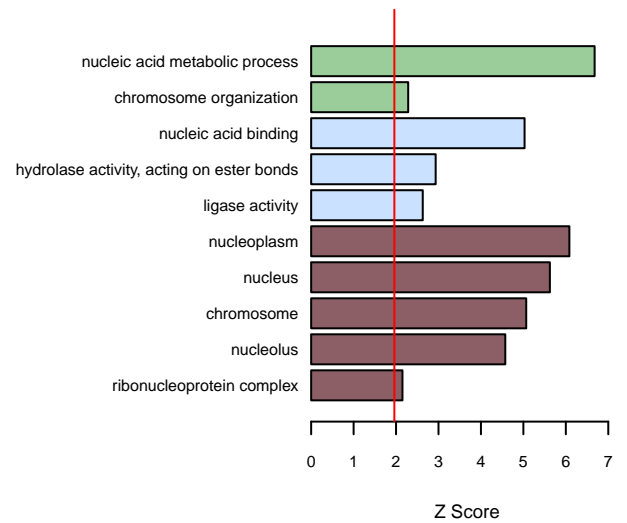

**M36 yellowgreen**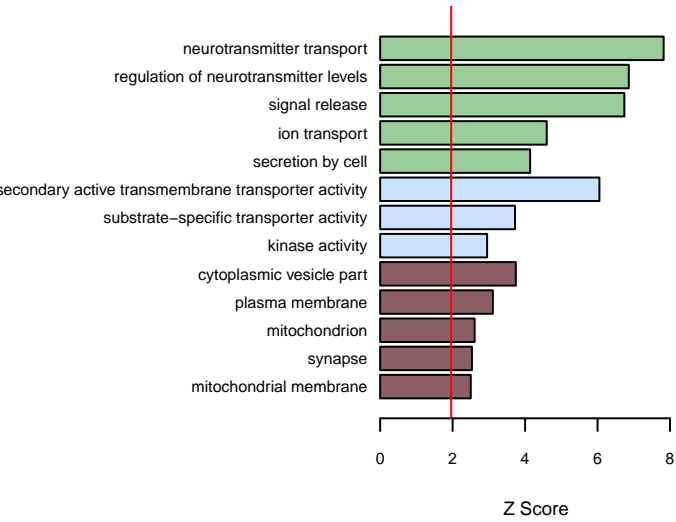**M37 skyblue3**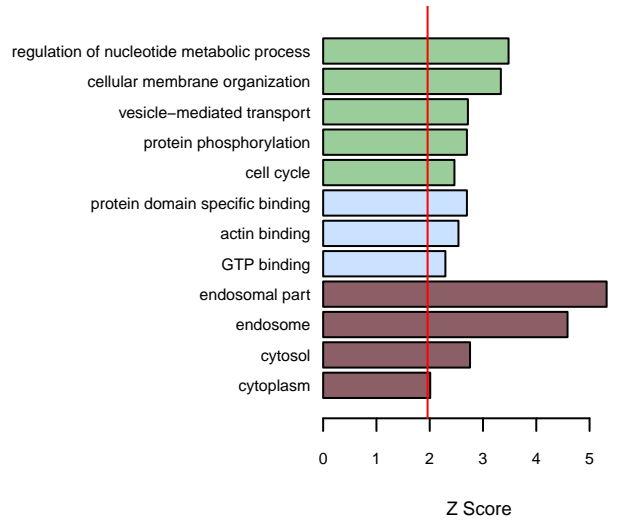**M38 plum1**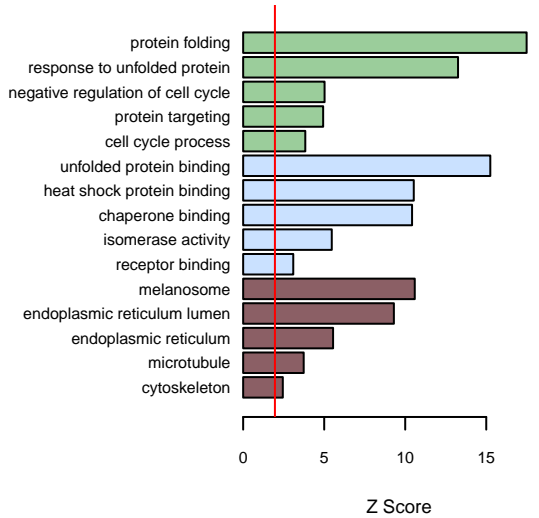**M39 orangered4**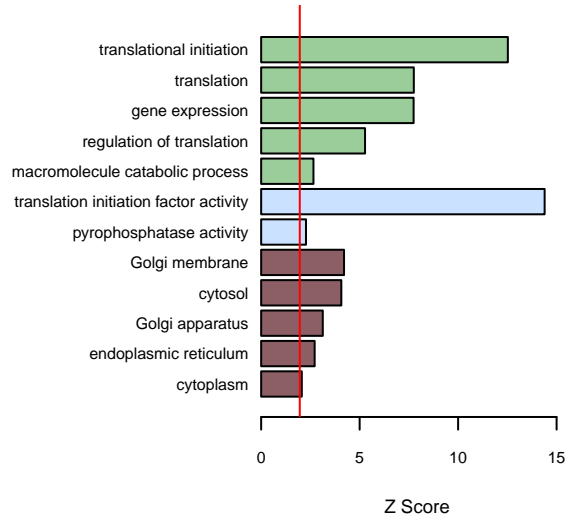**M40 mediumpurple3**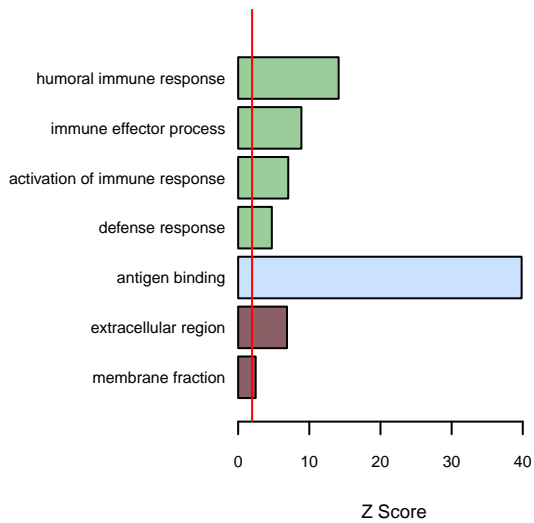**M41 lightsteelblue1**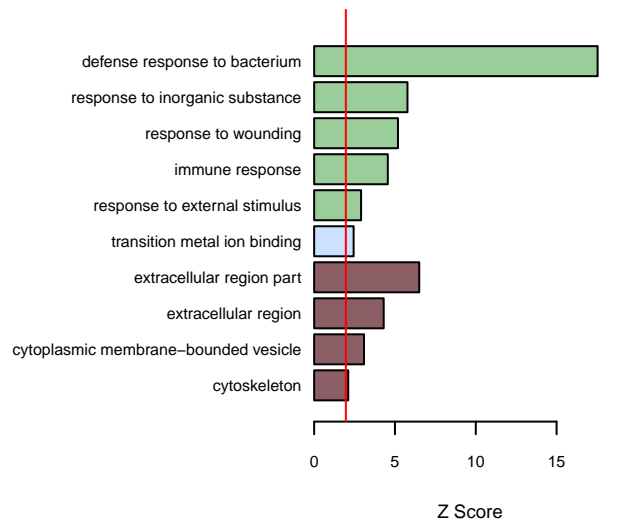



**M42 lightcyan1**

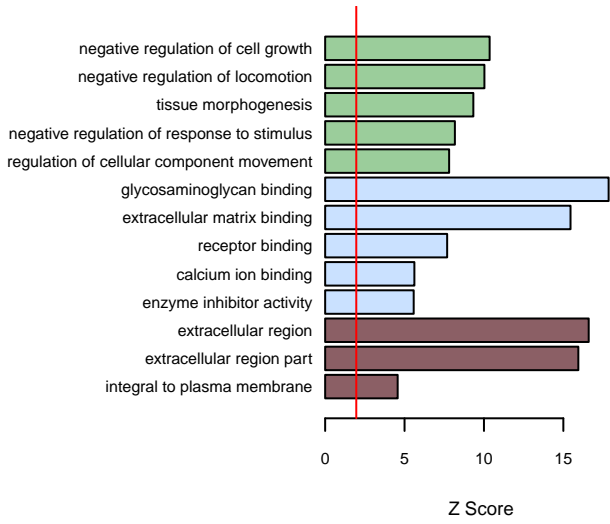

**M43 ivory**

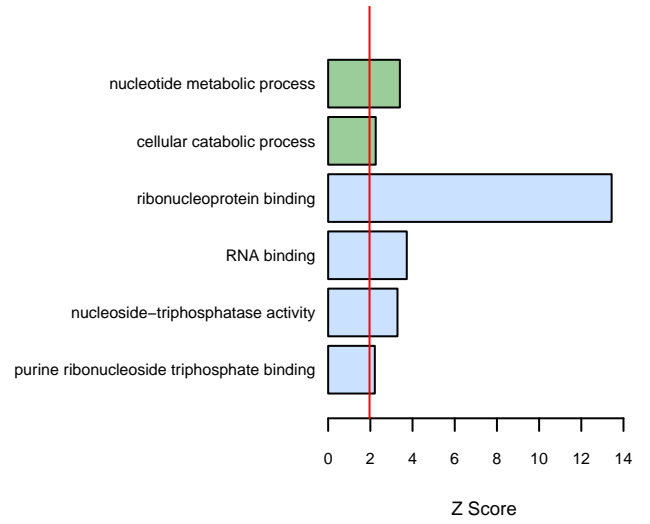

**M44 floralwhite**

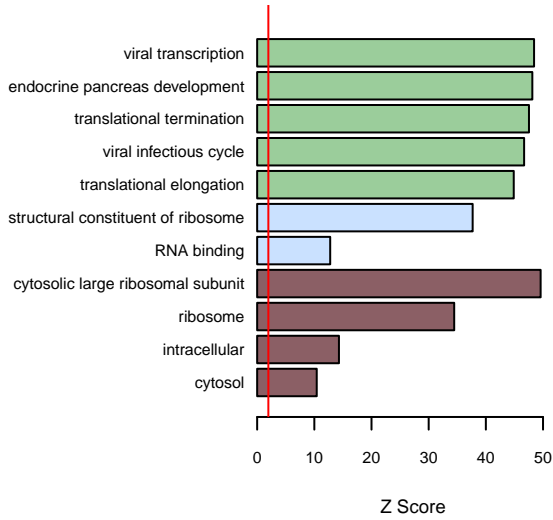

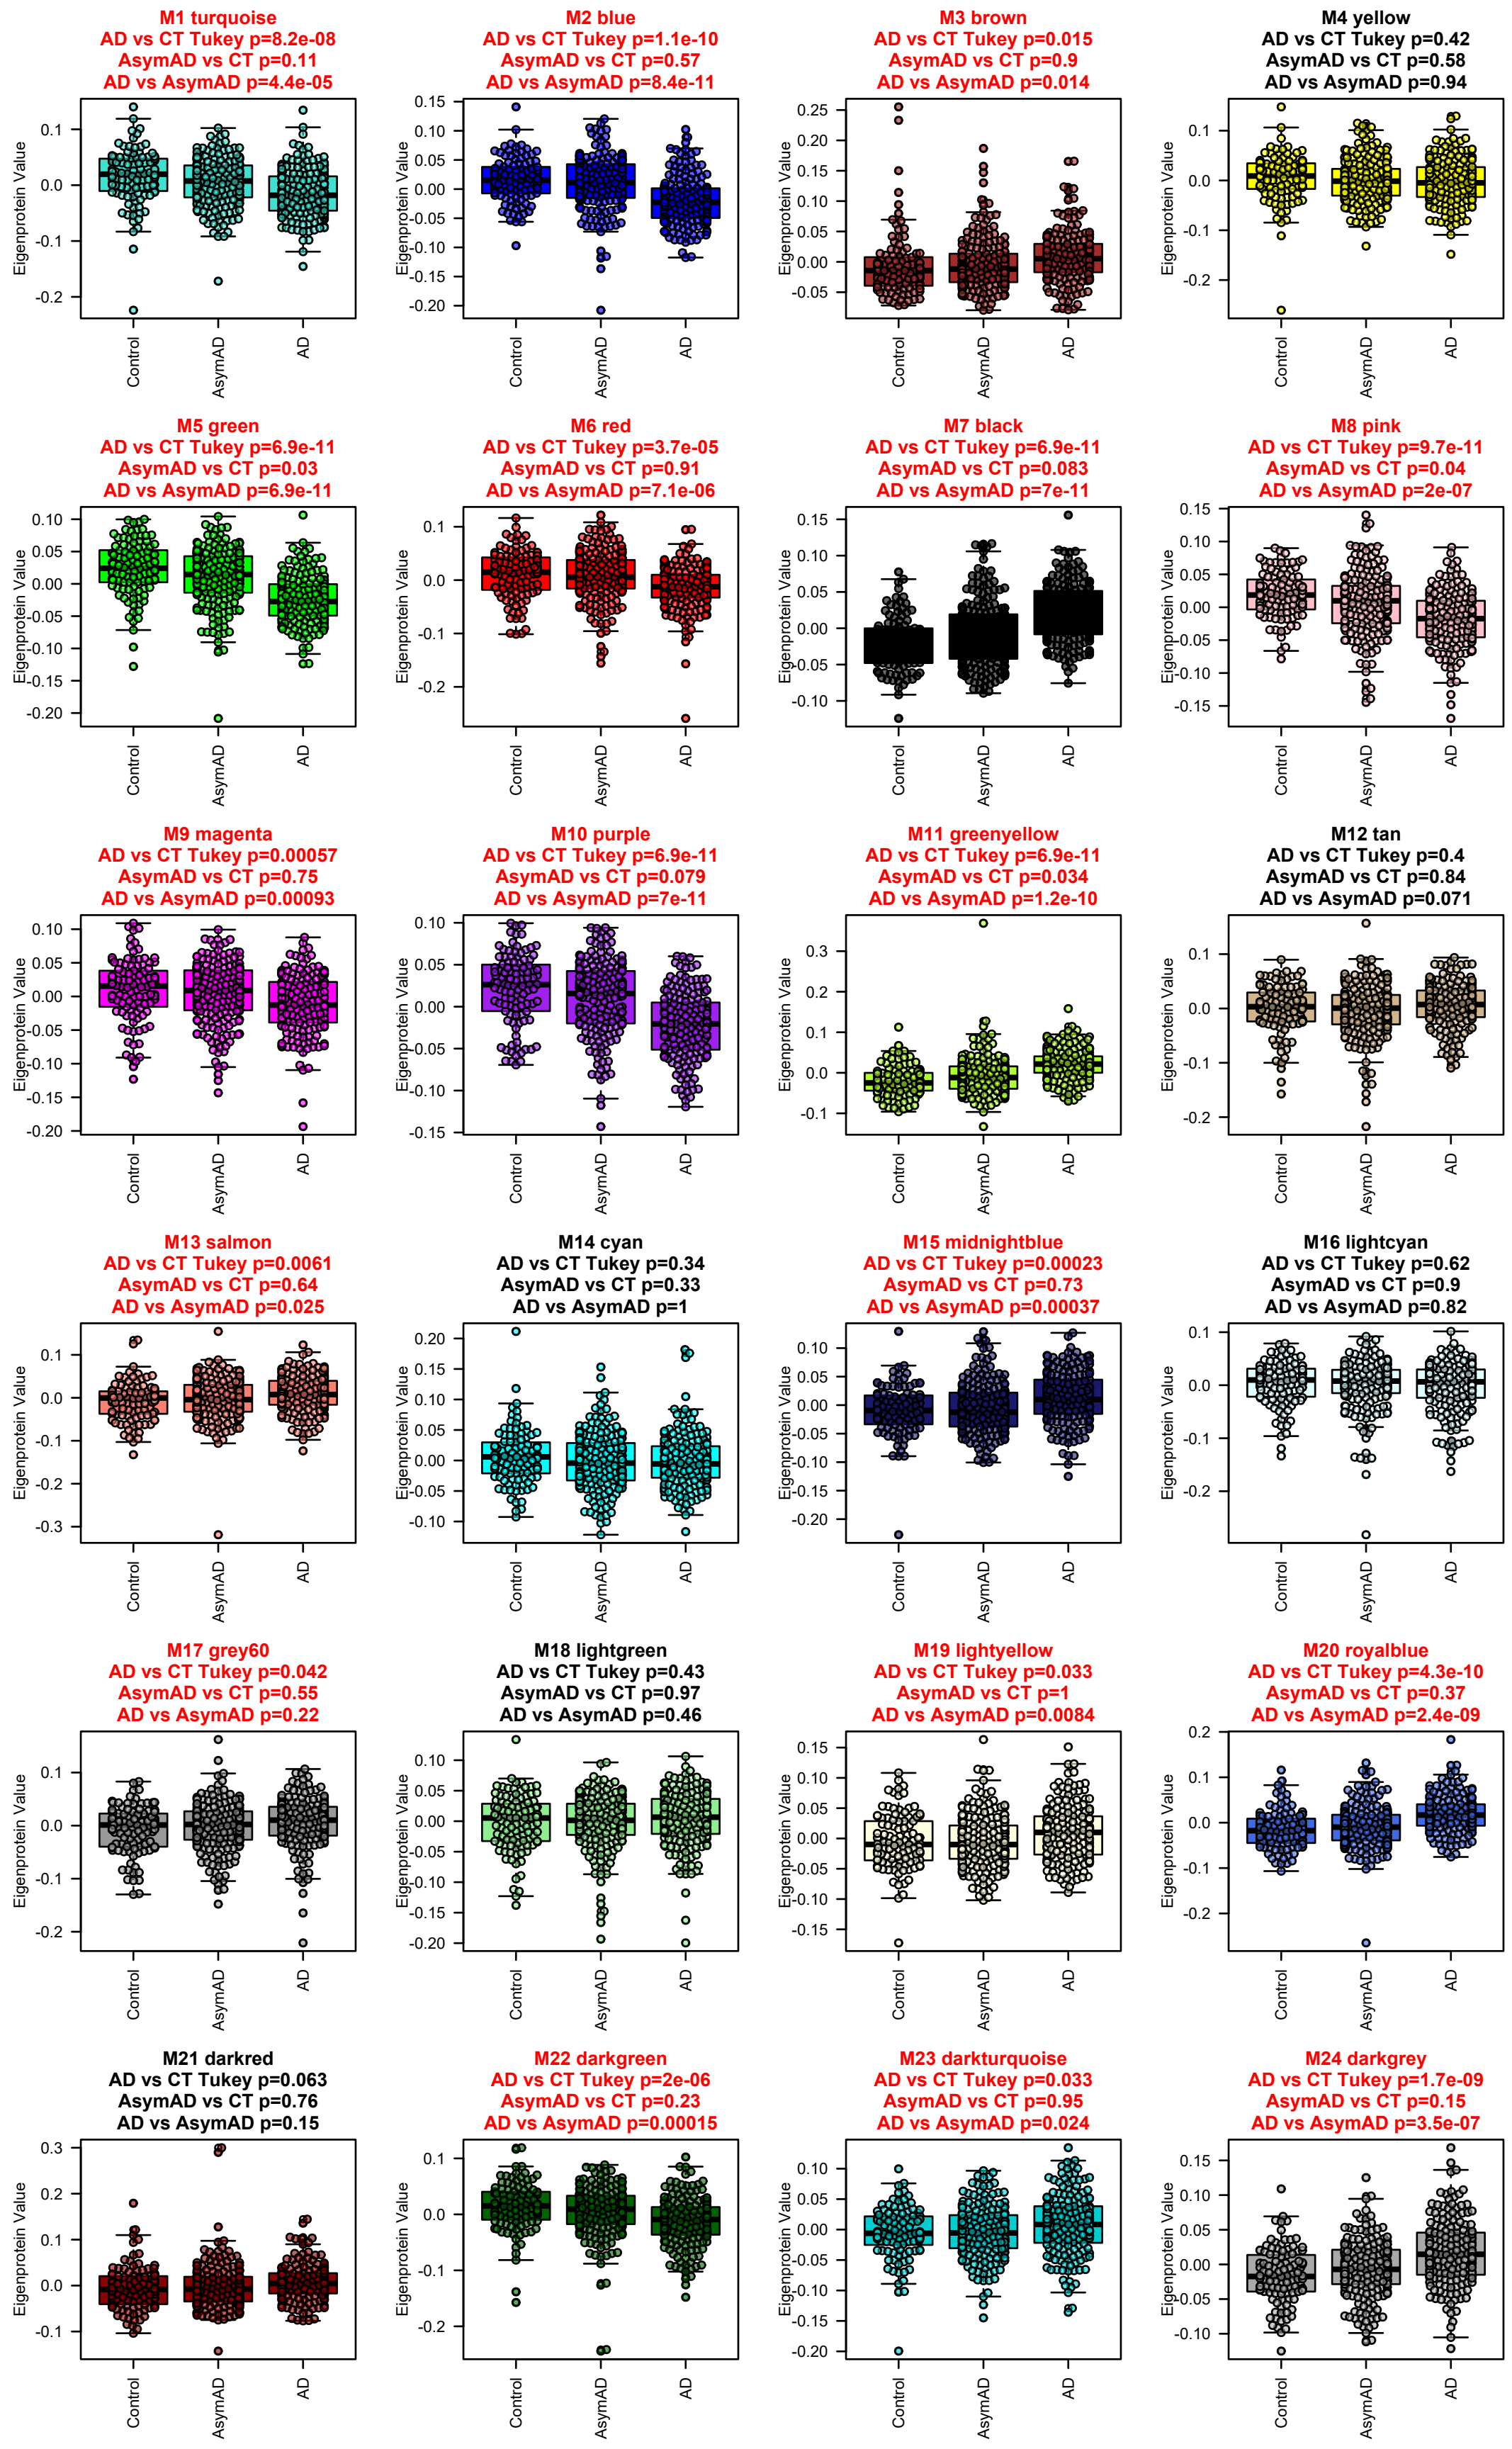

**M25 orange**  
AD vs CT Tukey p=2.6e-07  
AsymAD vs CT p=0.77  
AD vs AsymAD p=7.5e-08

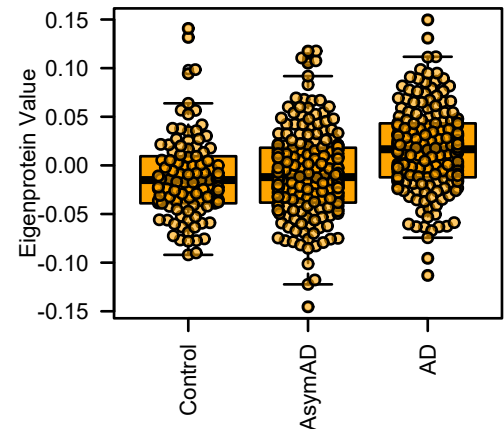

**M26 darkorange**  
AD vs CT Tukey p=0.015  
AsymAD vs CT p=0.48  
AD vs AsymAD p=0.12

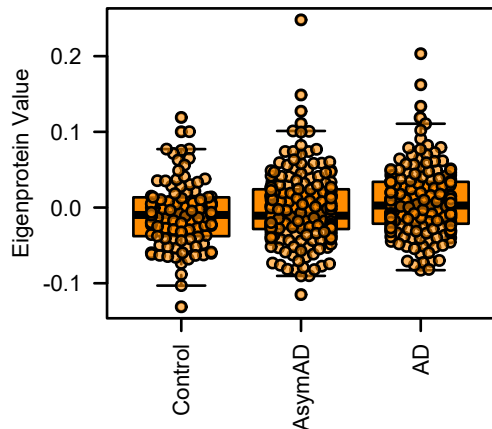

**M27 white**  
AD vs CT Tukey p=0.48  
AsymAD vs CT p=0.34  
AD vs AsymAD p=0.96

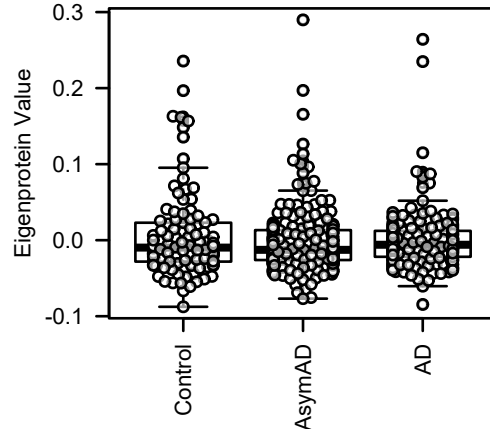

**M28 skyblue**  
AD vs CT Tukey p=0.00086  
AsymAD vs CT p=0.9  
AD vs AsymAD p=4e-04

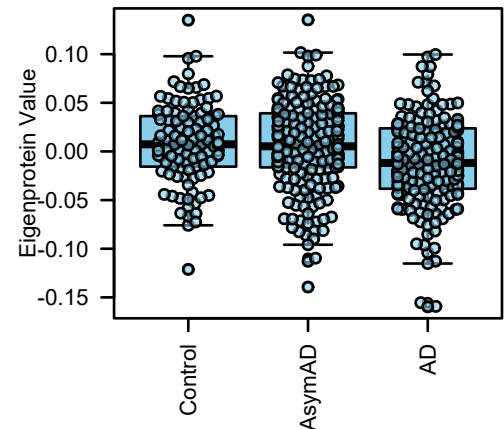

**M29 saddlebrown**  
AD vs CT Tukey p=1e-08  
AsymAD vs CT p=0.29  
AD vs AsymAD p=2.8e-07

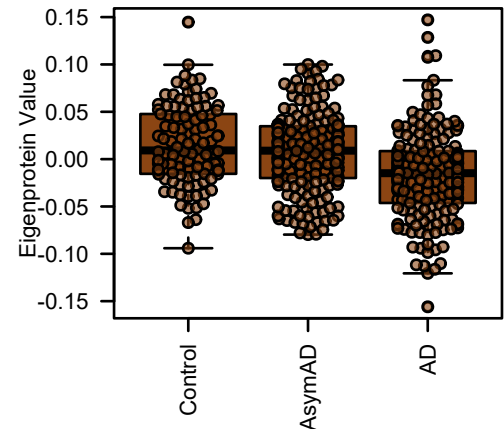

**M30 steelblue**  
AD vs CT Tukey p=0.18  
AsymAD vs CT p=0.7  
AD vs AsymAD p=0.47

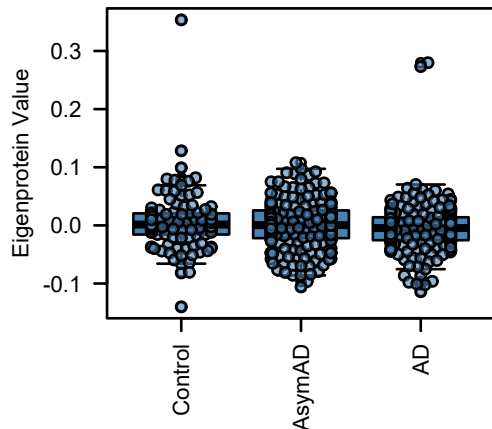

**M31 paleturquoise**  
AD vs CT Tukey p=0.19  
AsymAD vs CT p=0.82  
AD vs AsymAD p=0.34

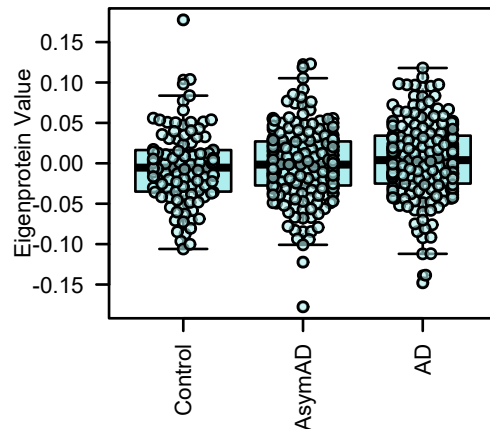

**M32 violet**  
AD vs CT Tukey p=0.033  
AsymAD vs CT p=0.71  
AD vs AsymAD p=0.098

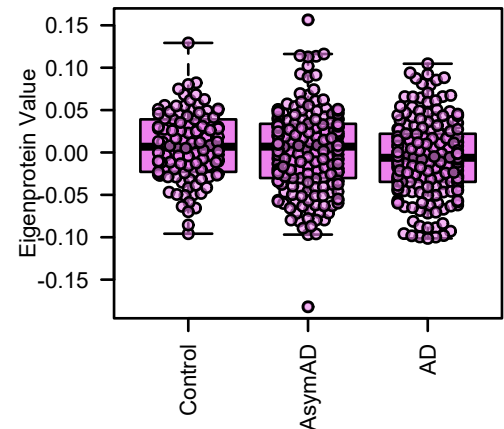

**M33 darkolivegreen**  
AD vs CT Tukey p=0.0021  
AsymAD vs CT p=0.84  
AD vs AsymAD p=0.0022

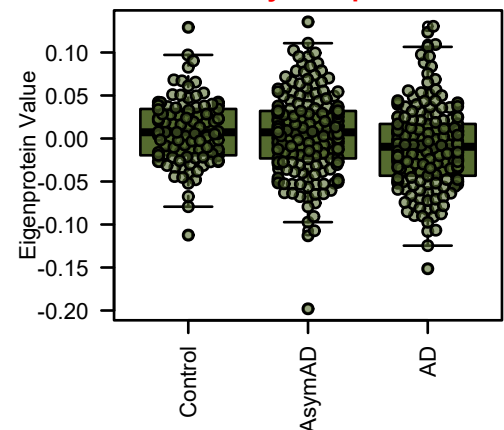

**M34 darkmagenta**  
AD vs CT Tukey p=0.043  
AsymAD vs CT p=0.46  
AD vs AsymAD p=0.3

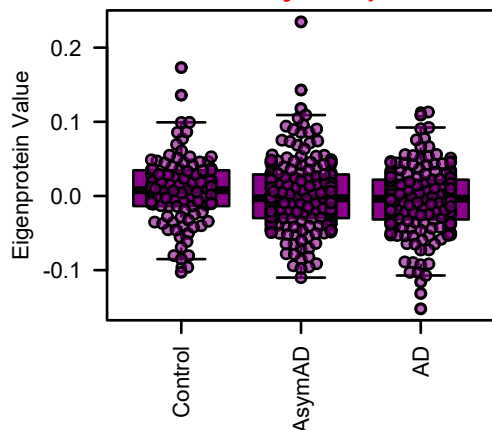

**M35 sienna3**  
AD vs CT Tukey p=0.98  
AsymAD vs CT p=0.84  
AD vs AsymAD p=0.63

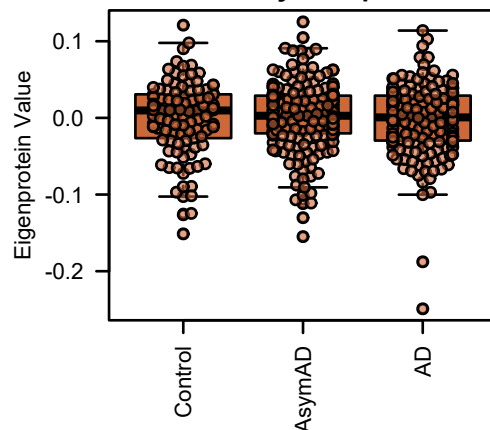

**M36 yellowgreen**  
AD vs CT Tukey p=0.48  
AsymAD vs CT p=1  
AD vs AsymAD p=0.34

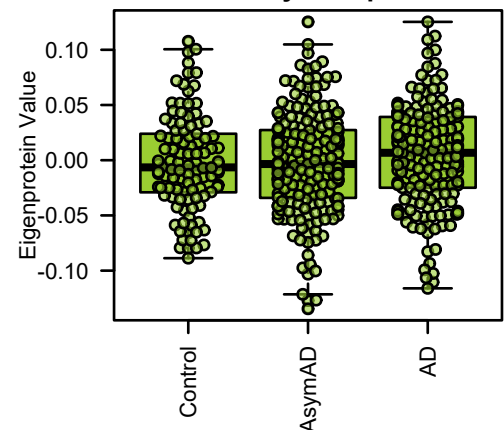

**M37 skyblue3**  
AD vs CT Tukey p=0.33  
AsymAD vs CT p=0.93  
AD vs AsymAD p=0.084

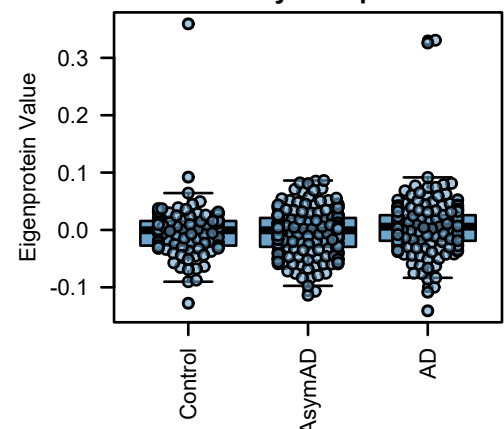

**M38 plum1**  
AD vs CT Tukey p=0.81  
AsymAD vs CT p=1  
AD vs AsymAD p=0.72

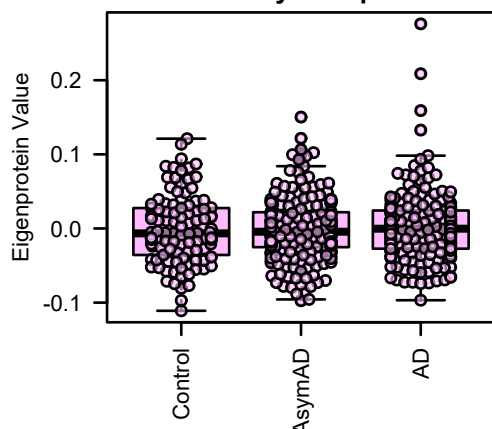

**M39 orangered4**  
AD vs CT Tukey p=0.19  
AsymAD vs CT p=0.97  
AD vs AsymAD p=0.16

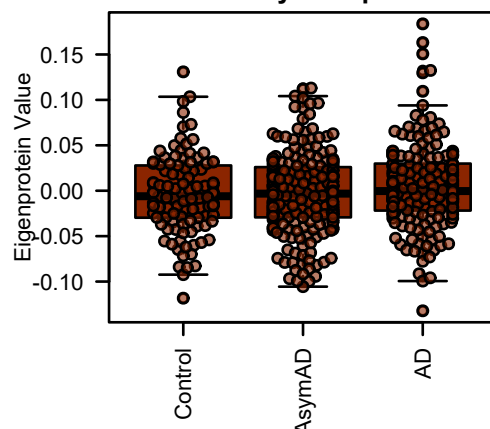

**M40 mediumpurple3**  
AD vs CT Tukey p=0.86  
AsymAD vs CT p=0.24  
AD vs AsymAD p=0.032

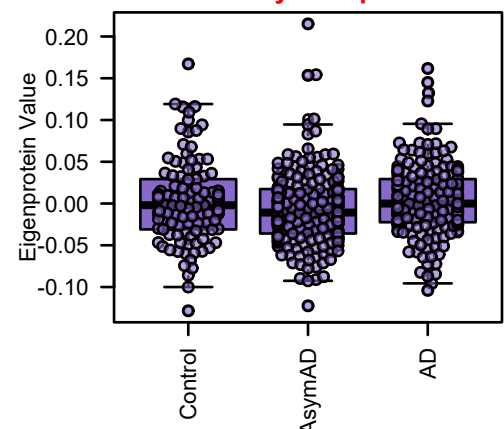

**M41 lightsteelblue1**  
AD vs CT Tukey p=0.84  
AsymAD vs CT p=0.98  
AD vs AsymAD p=0.89

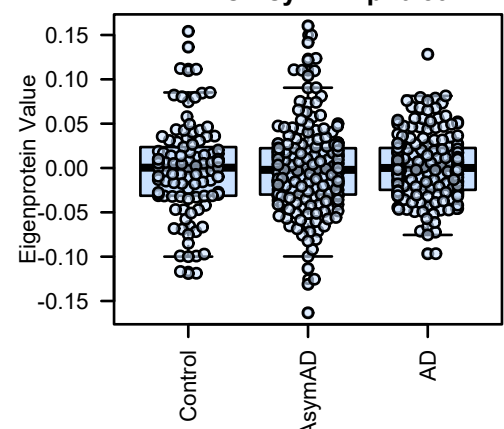

**M42 lightcyan1**  
AD vs CT Tukey p=6.9e-11  
AsymAD vs CT p=6.9e-11  
AD vs AsymAD p=1.4e-09

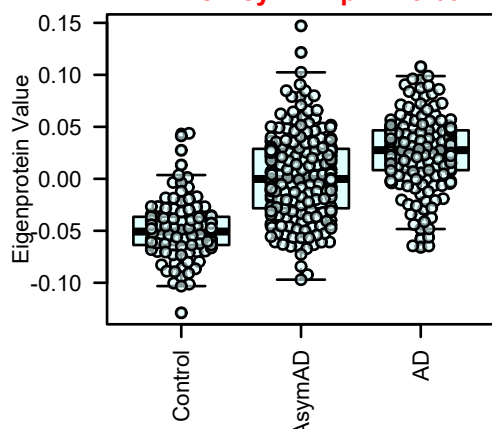

**M43 ivory**  
AD vs CT Tukey p=0.16  
AsymAD vs CT p=1  
AD vs AsymAD p=0.083

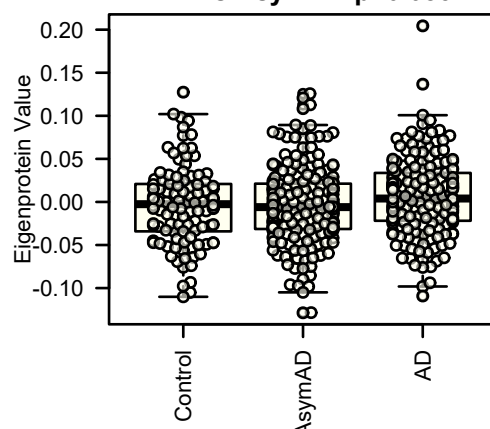

**M44 floralwhite**  
AD vs CT Tukey p=7.8e-06  
AsymAD vs CT p=0.98  
AD vs AsymAD p=2.2e-07

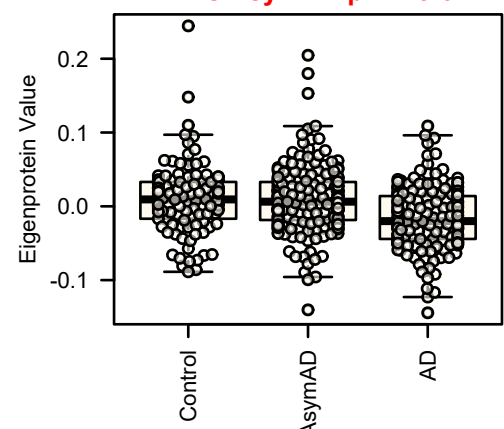















Module 4, n = 291,  
FDR Corrected pvalue 1.6684e-07

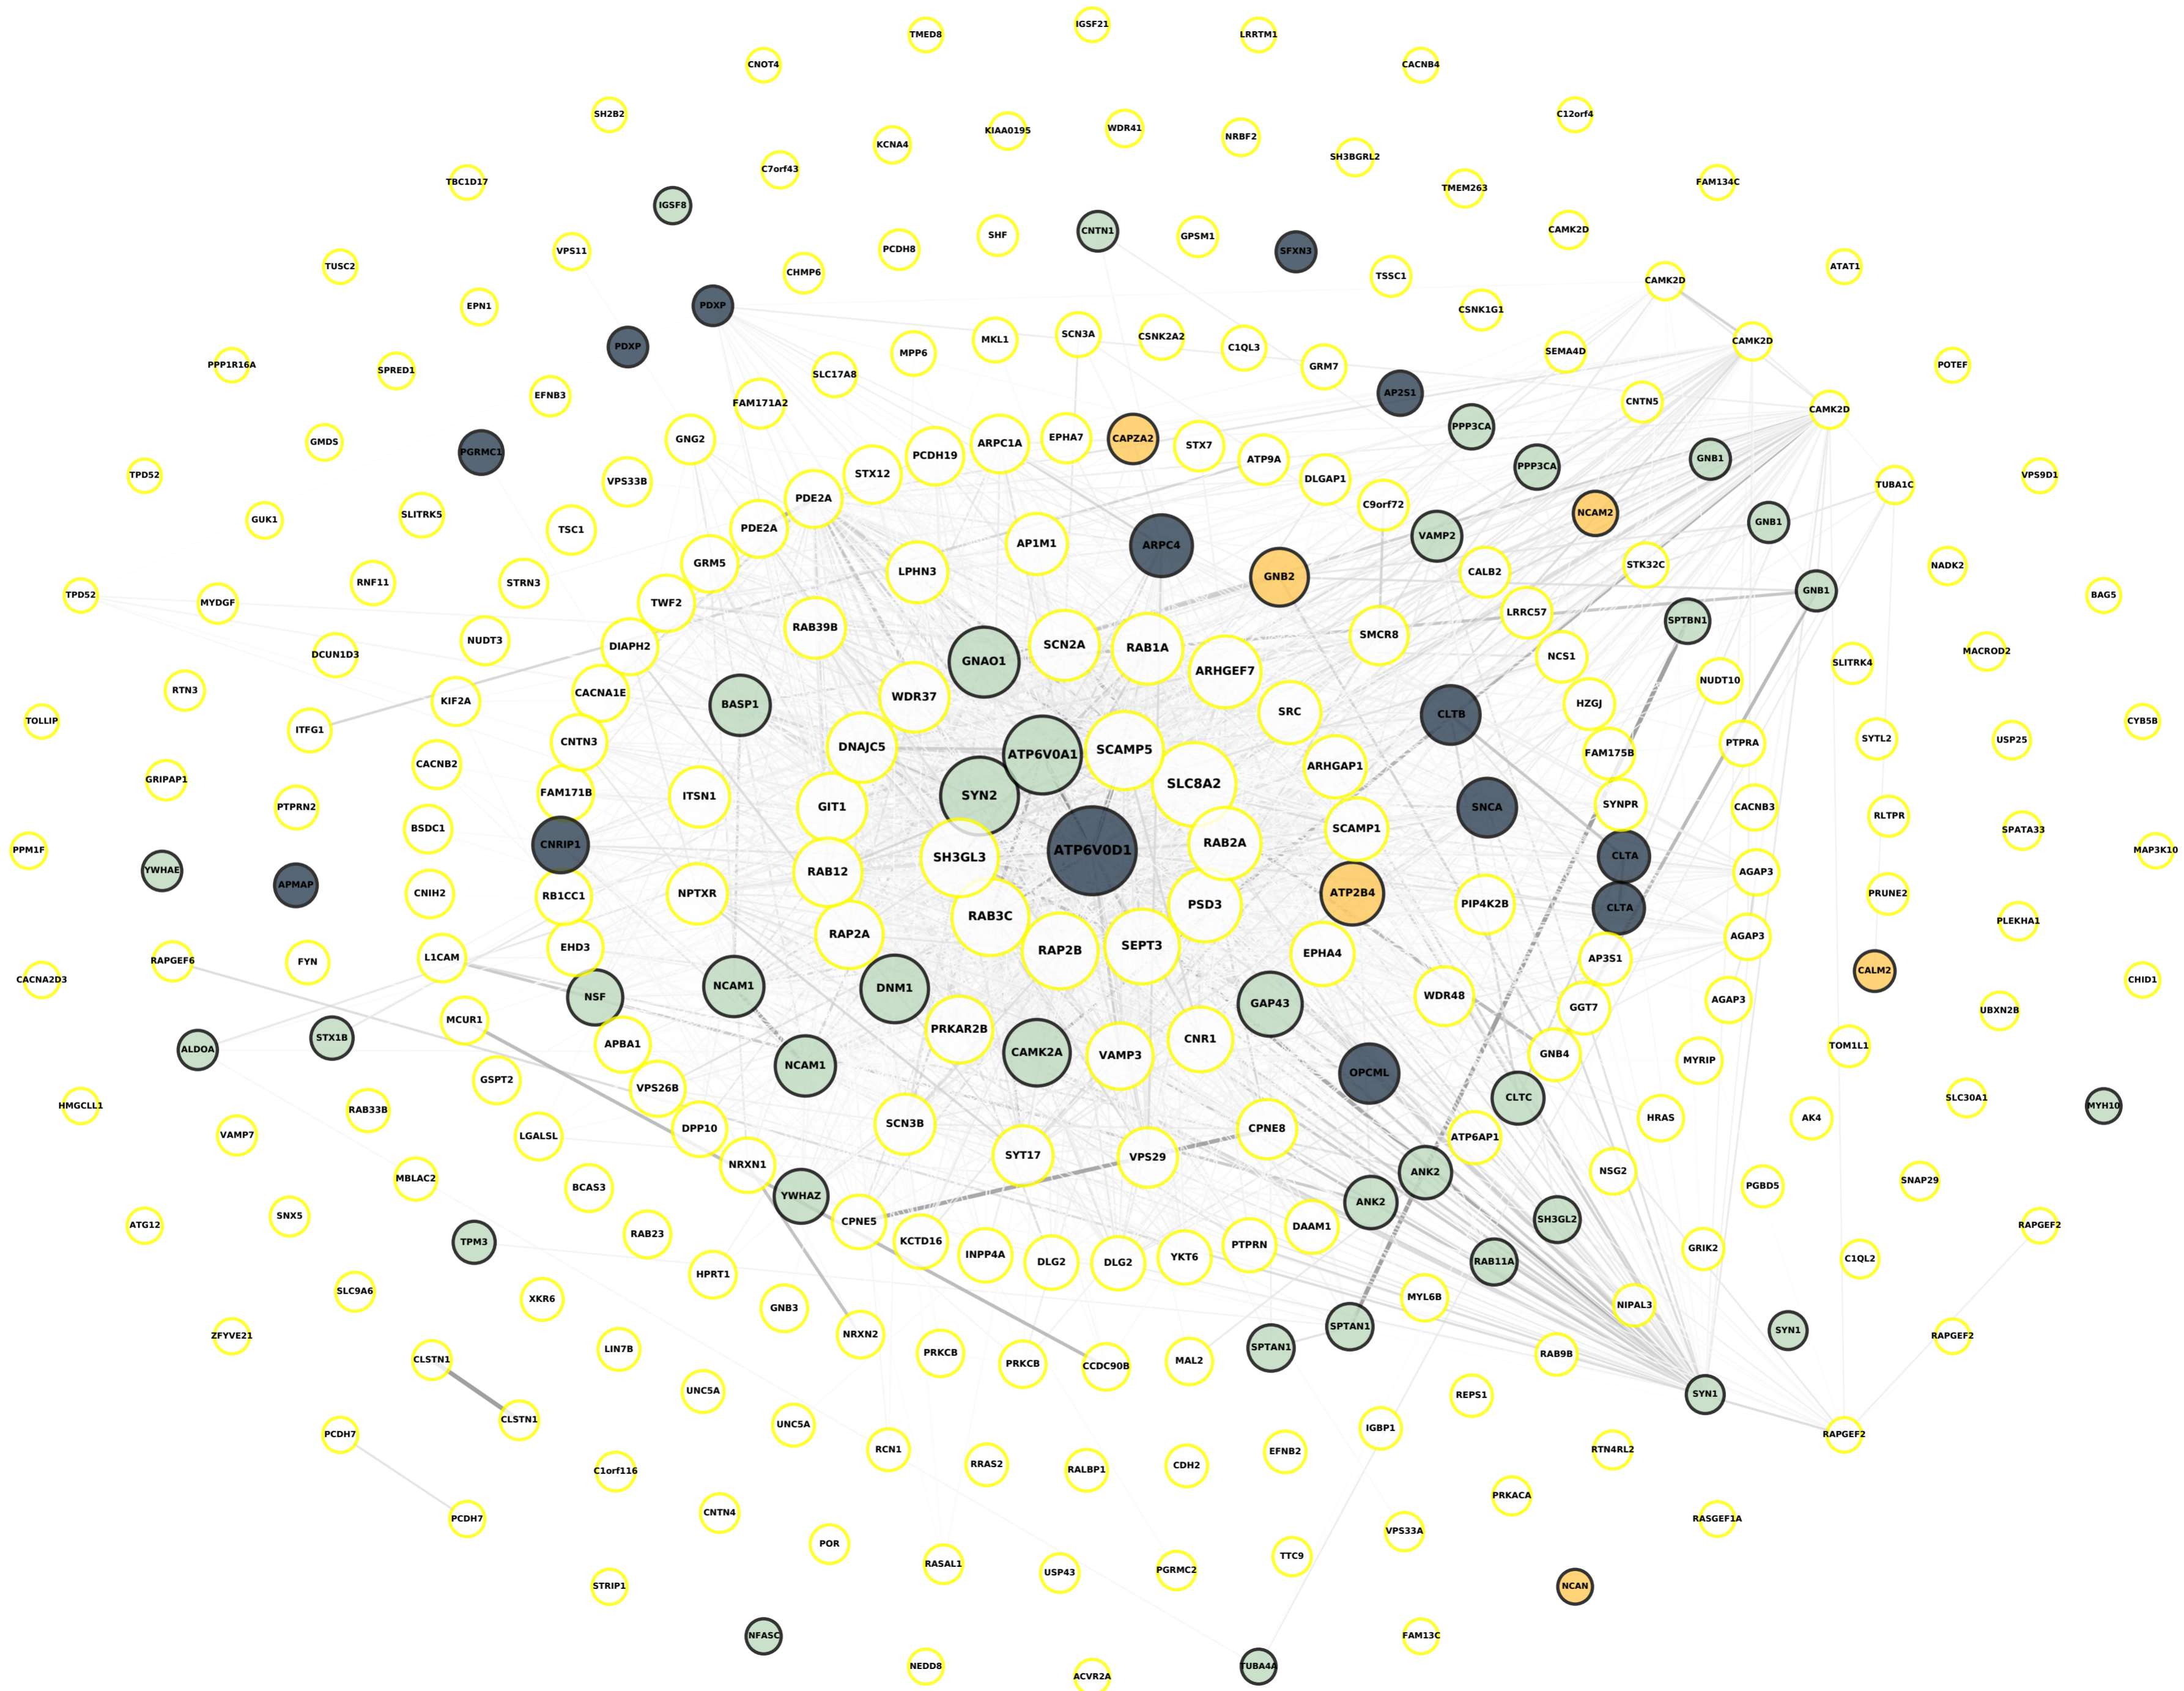



Module 5, n = 249,  
FDR Corrected pvalue 1

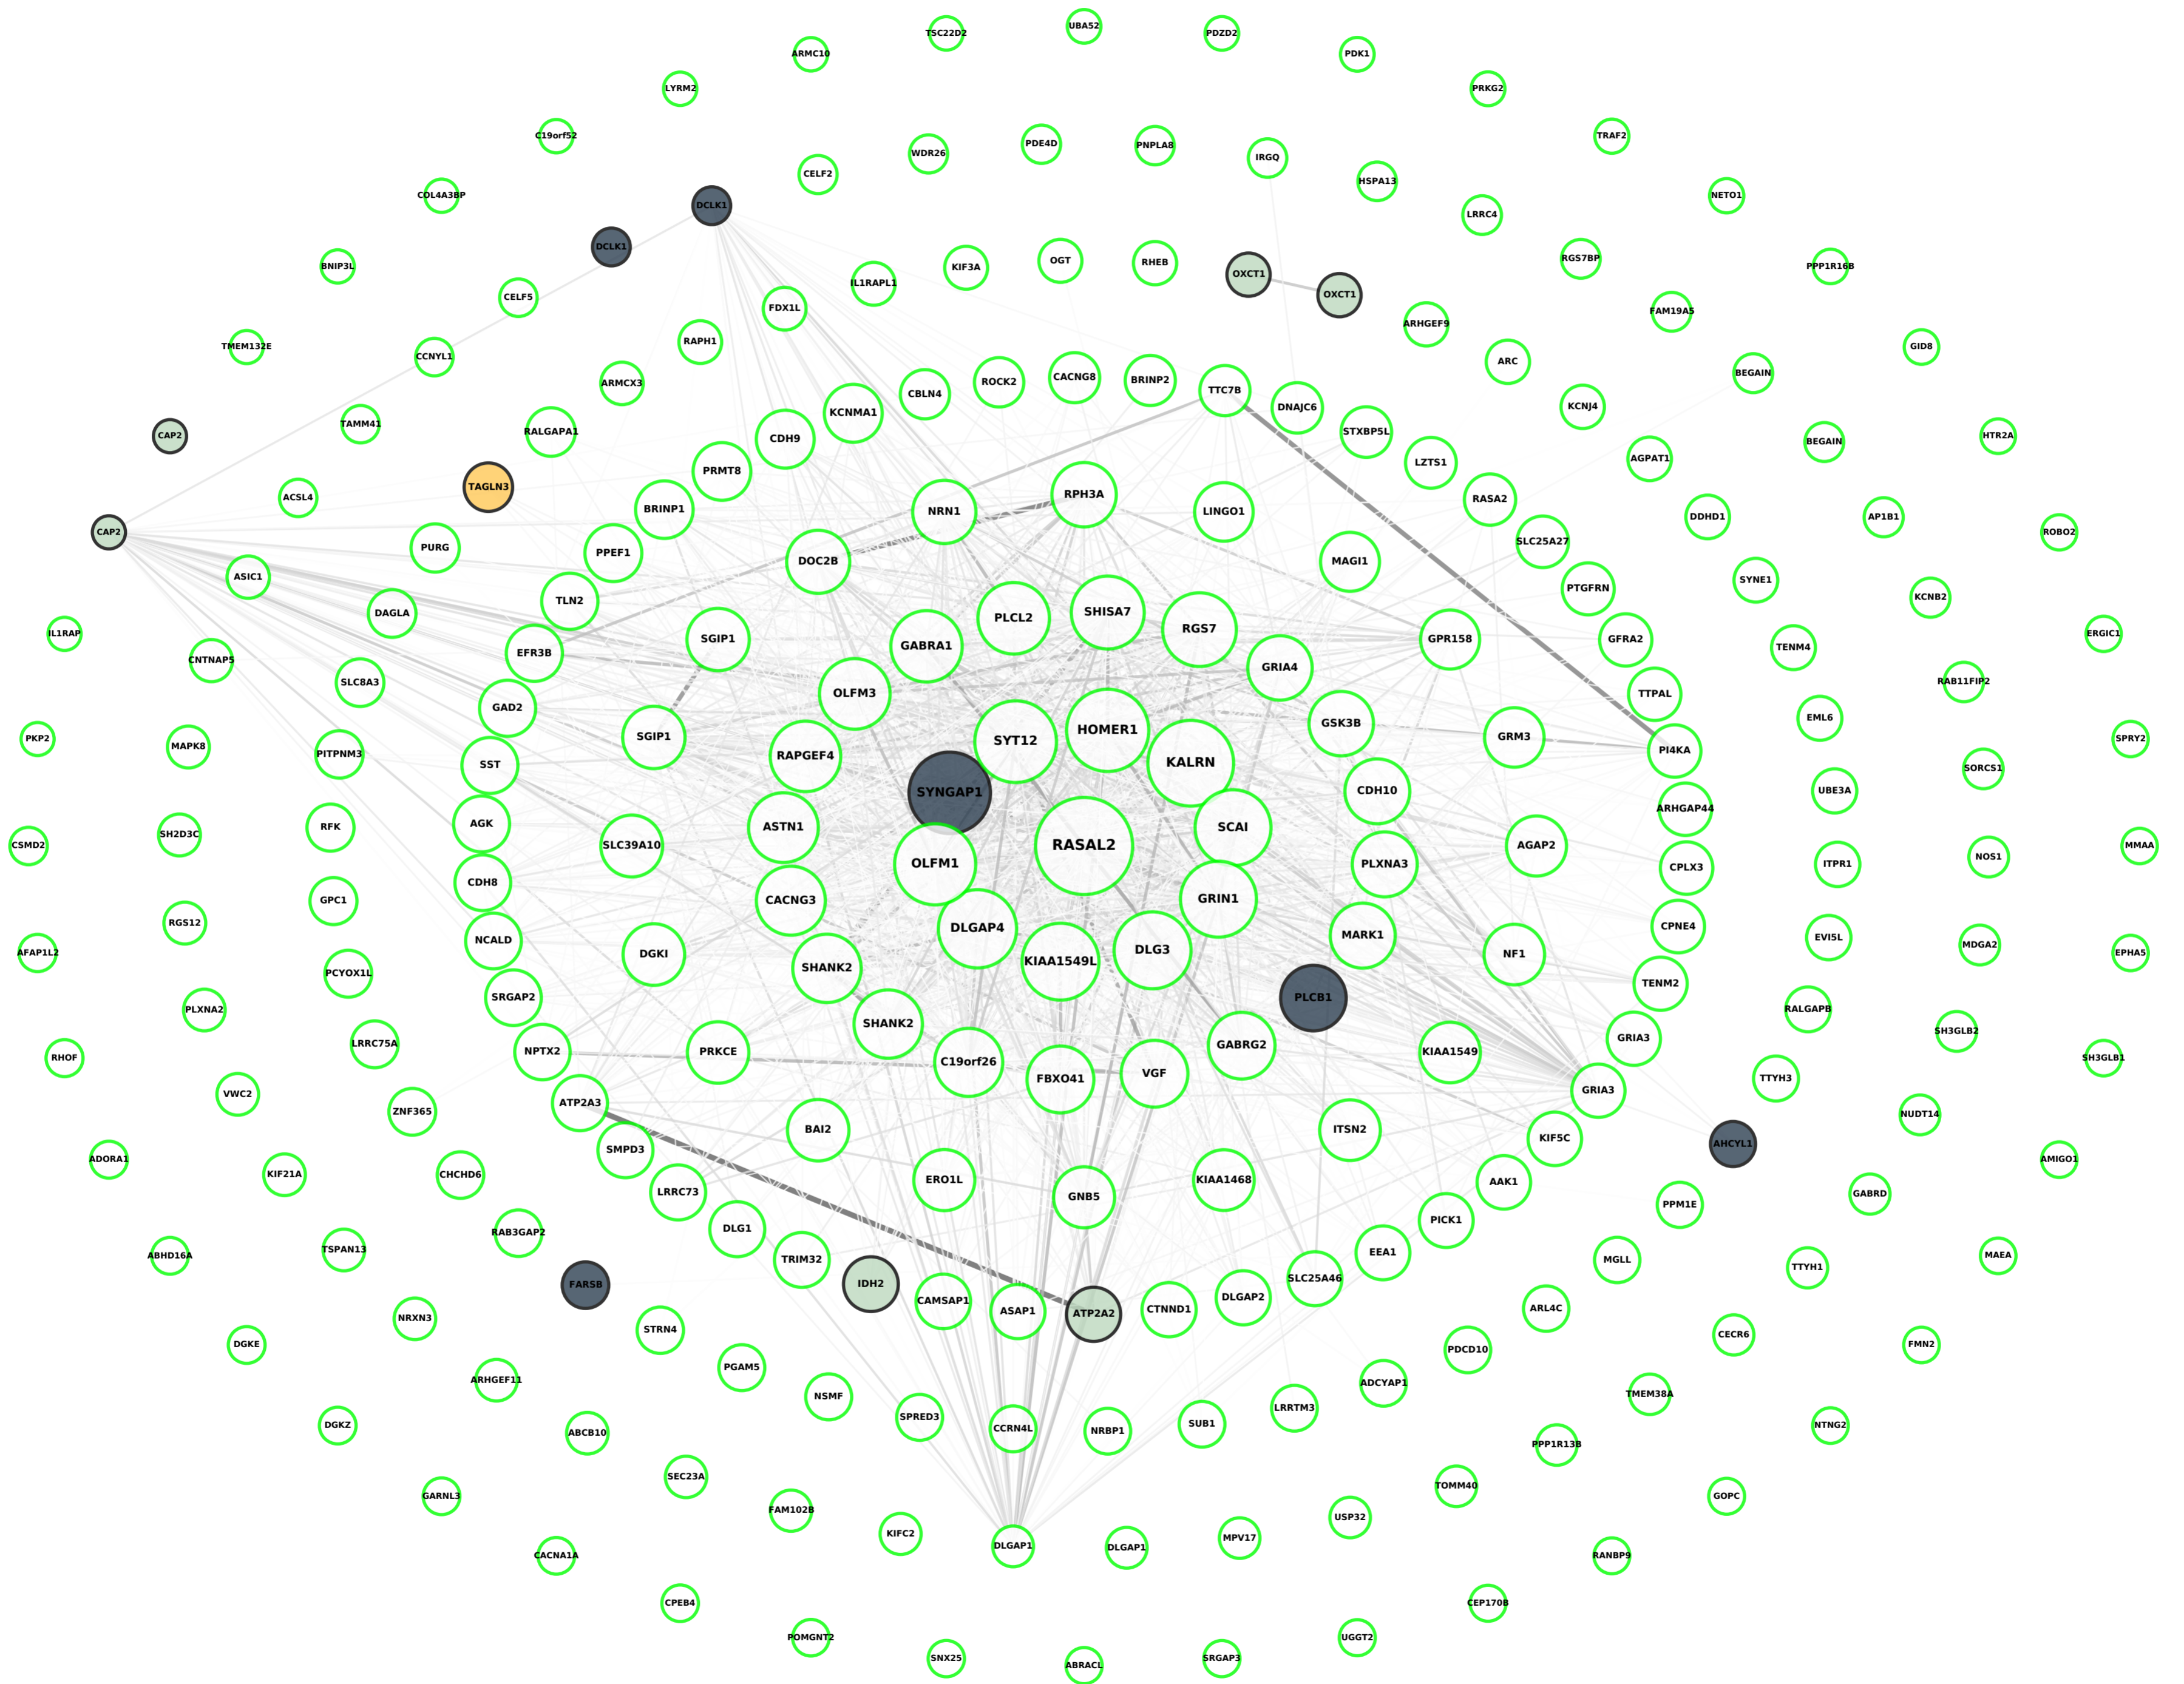



Module 6, n = 248,  
FDR Corrected pvalue 1

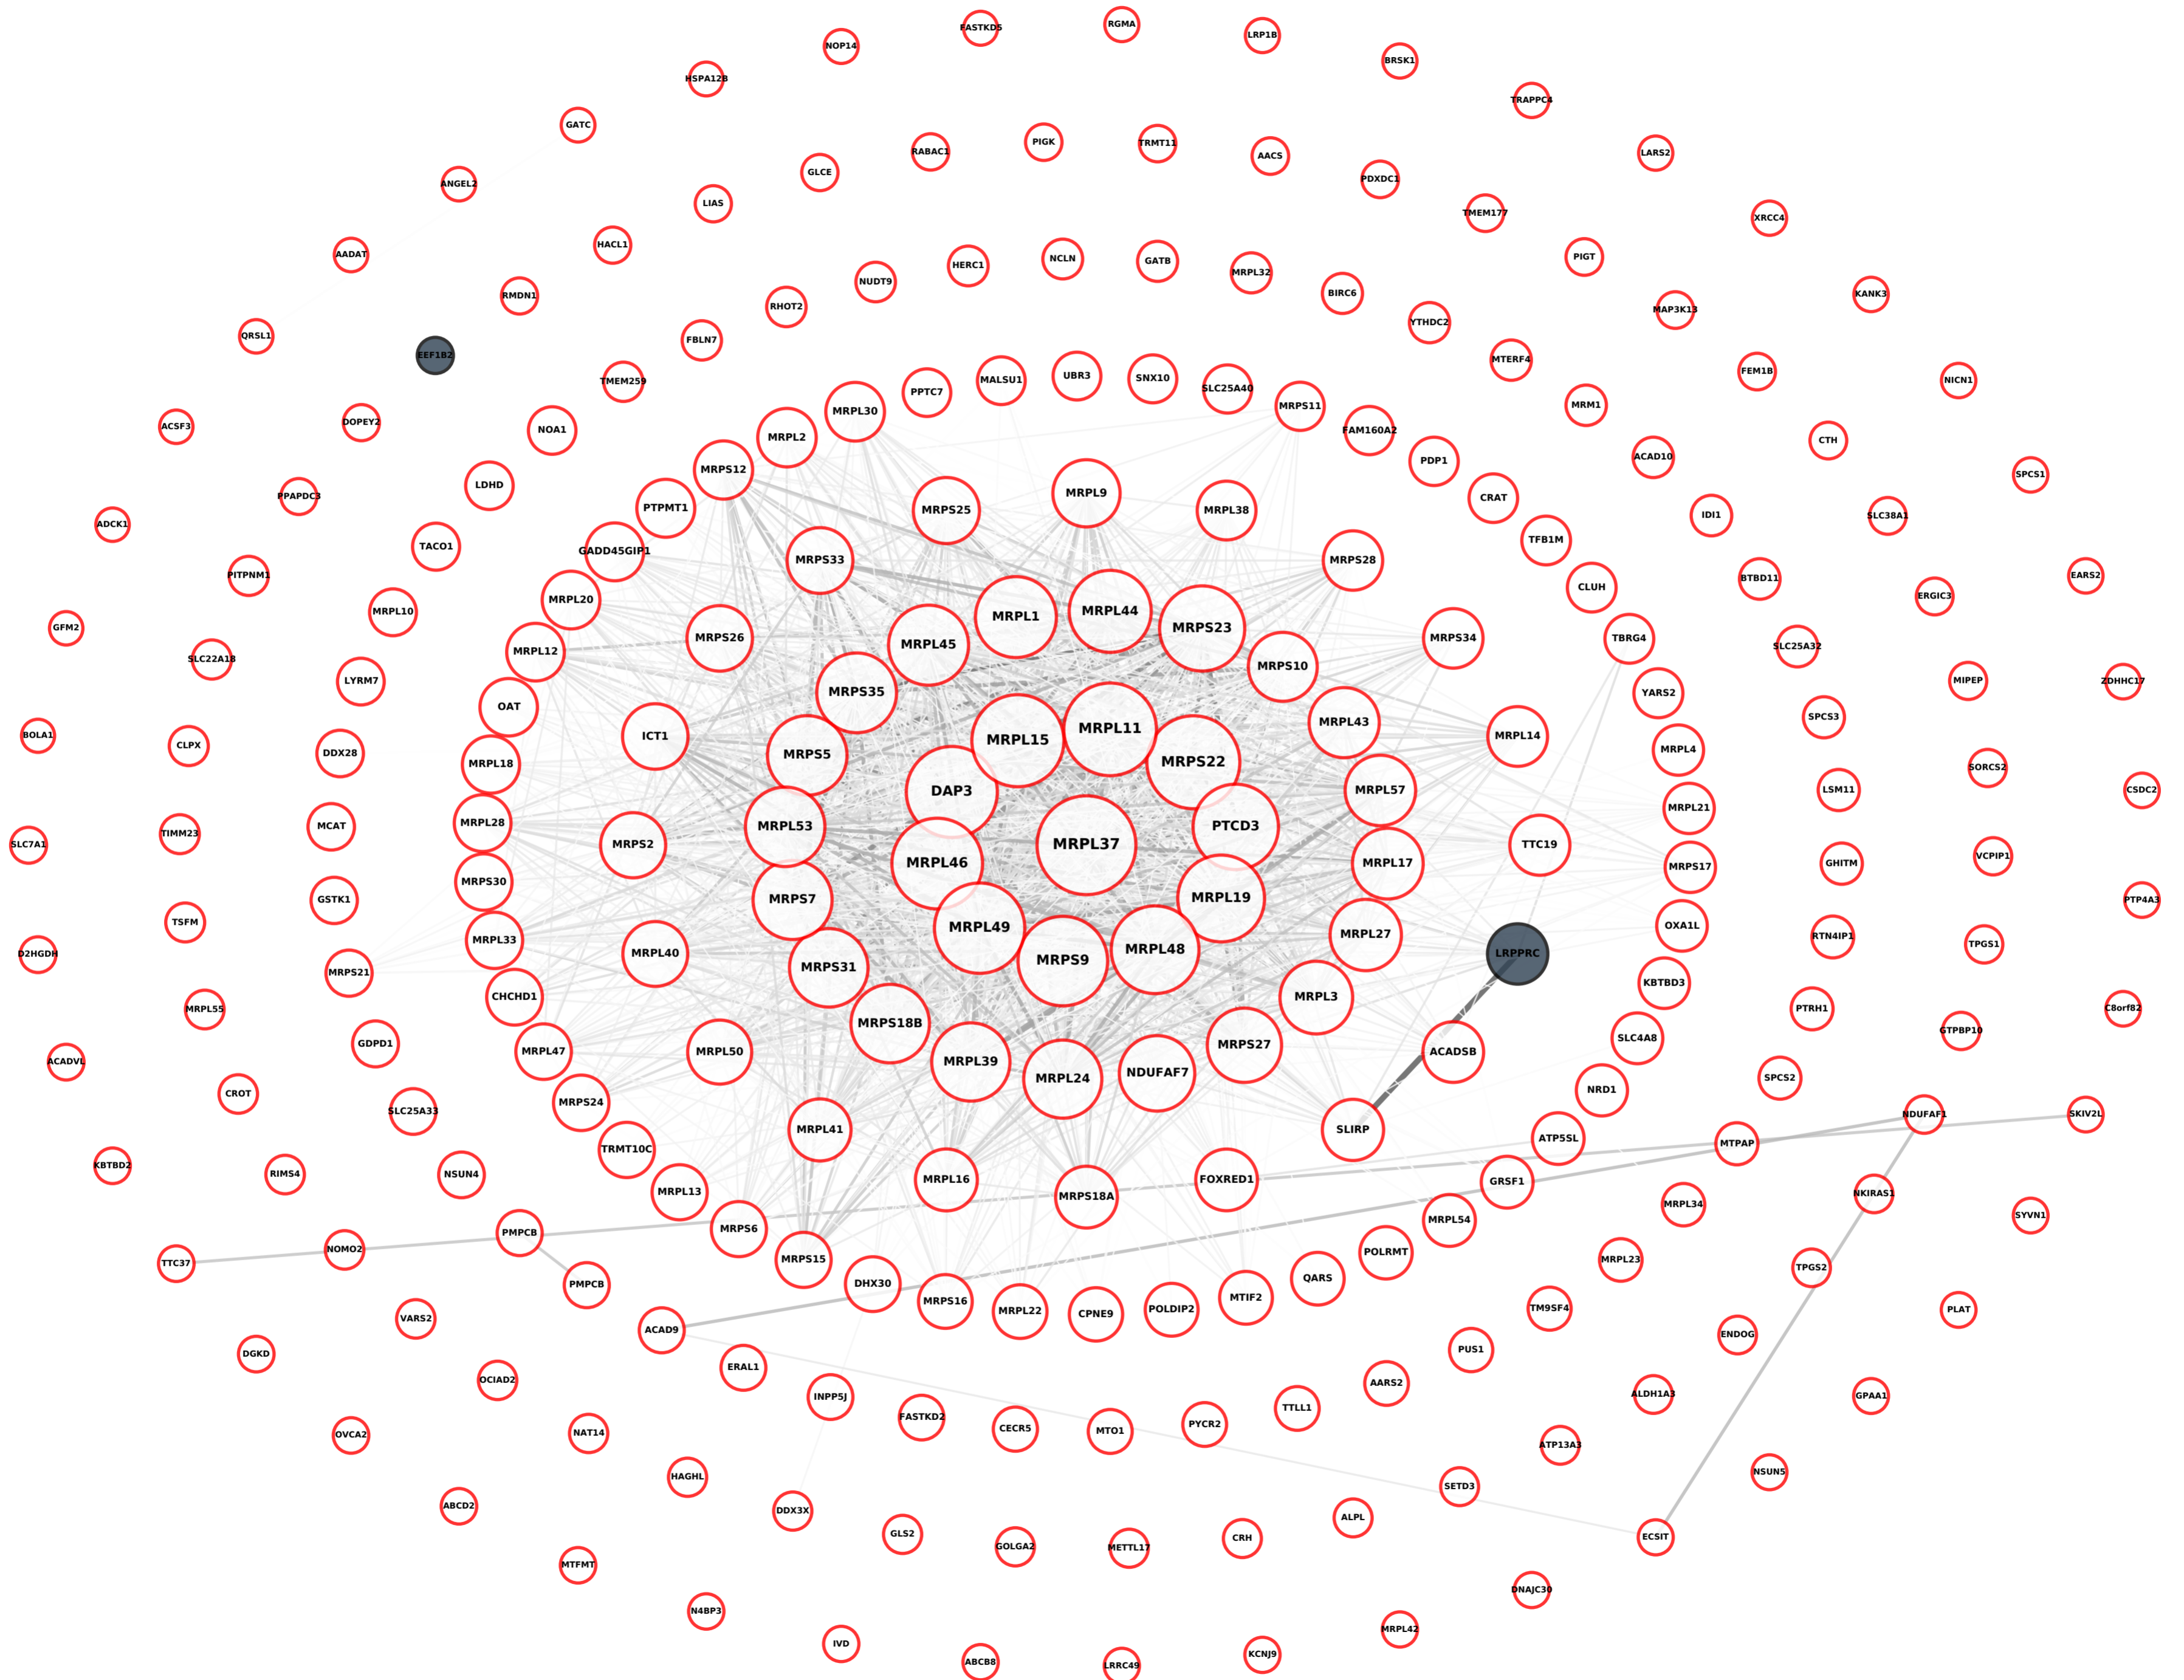



Module 7, n = 234,  
FDR Corrected pvalue 0.00044895

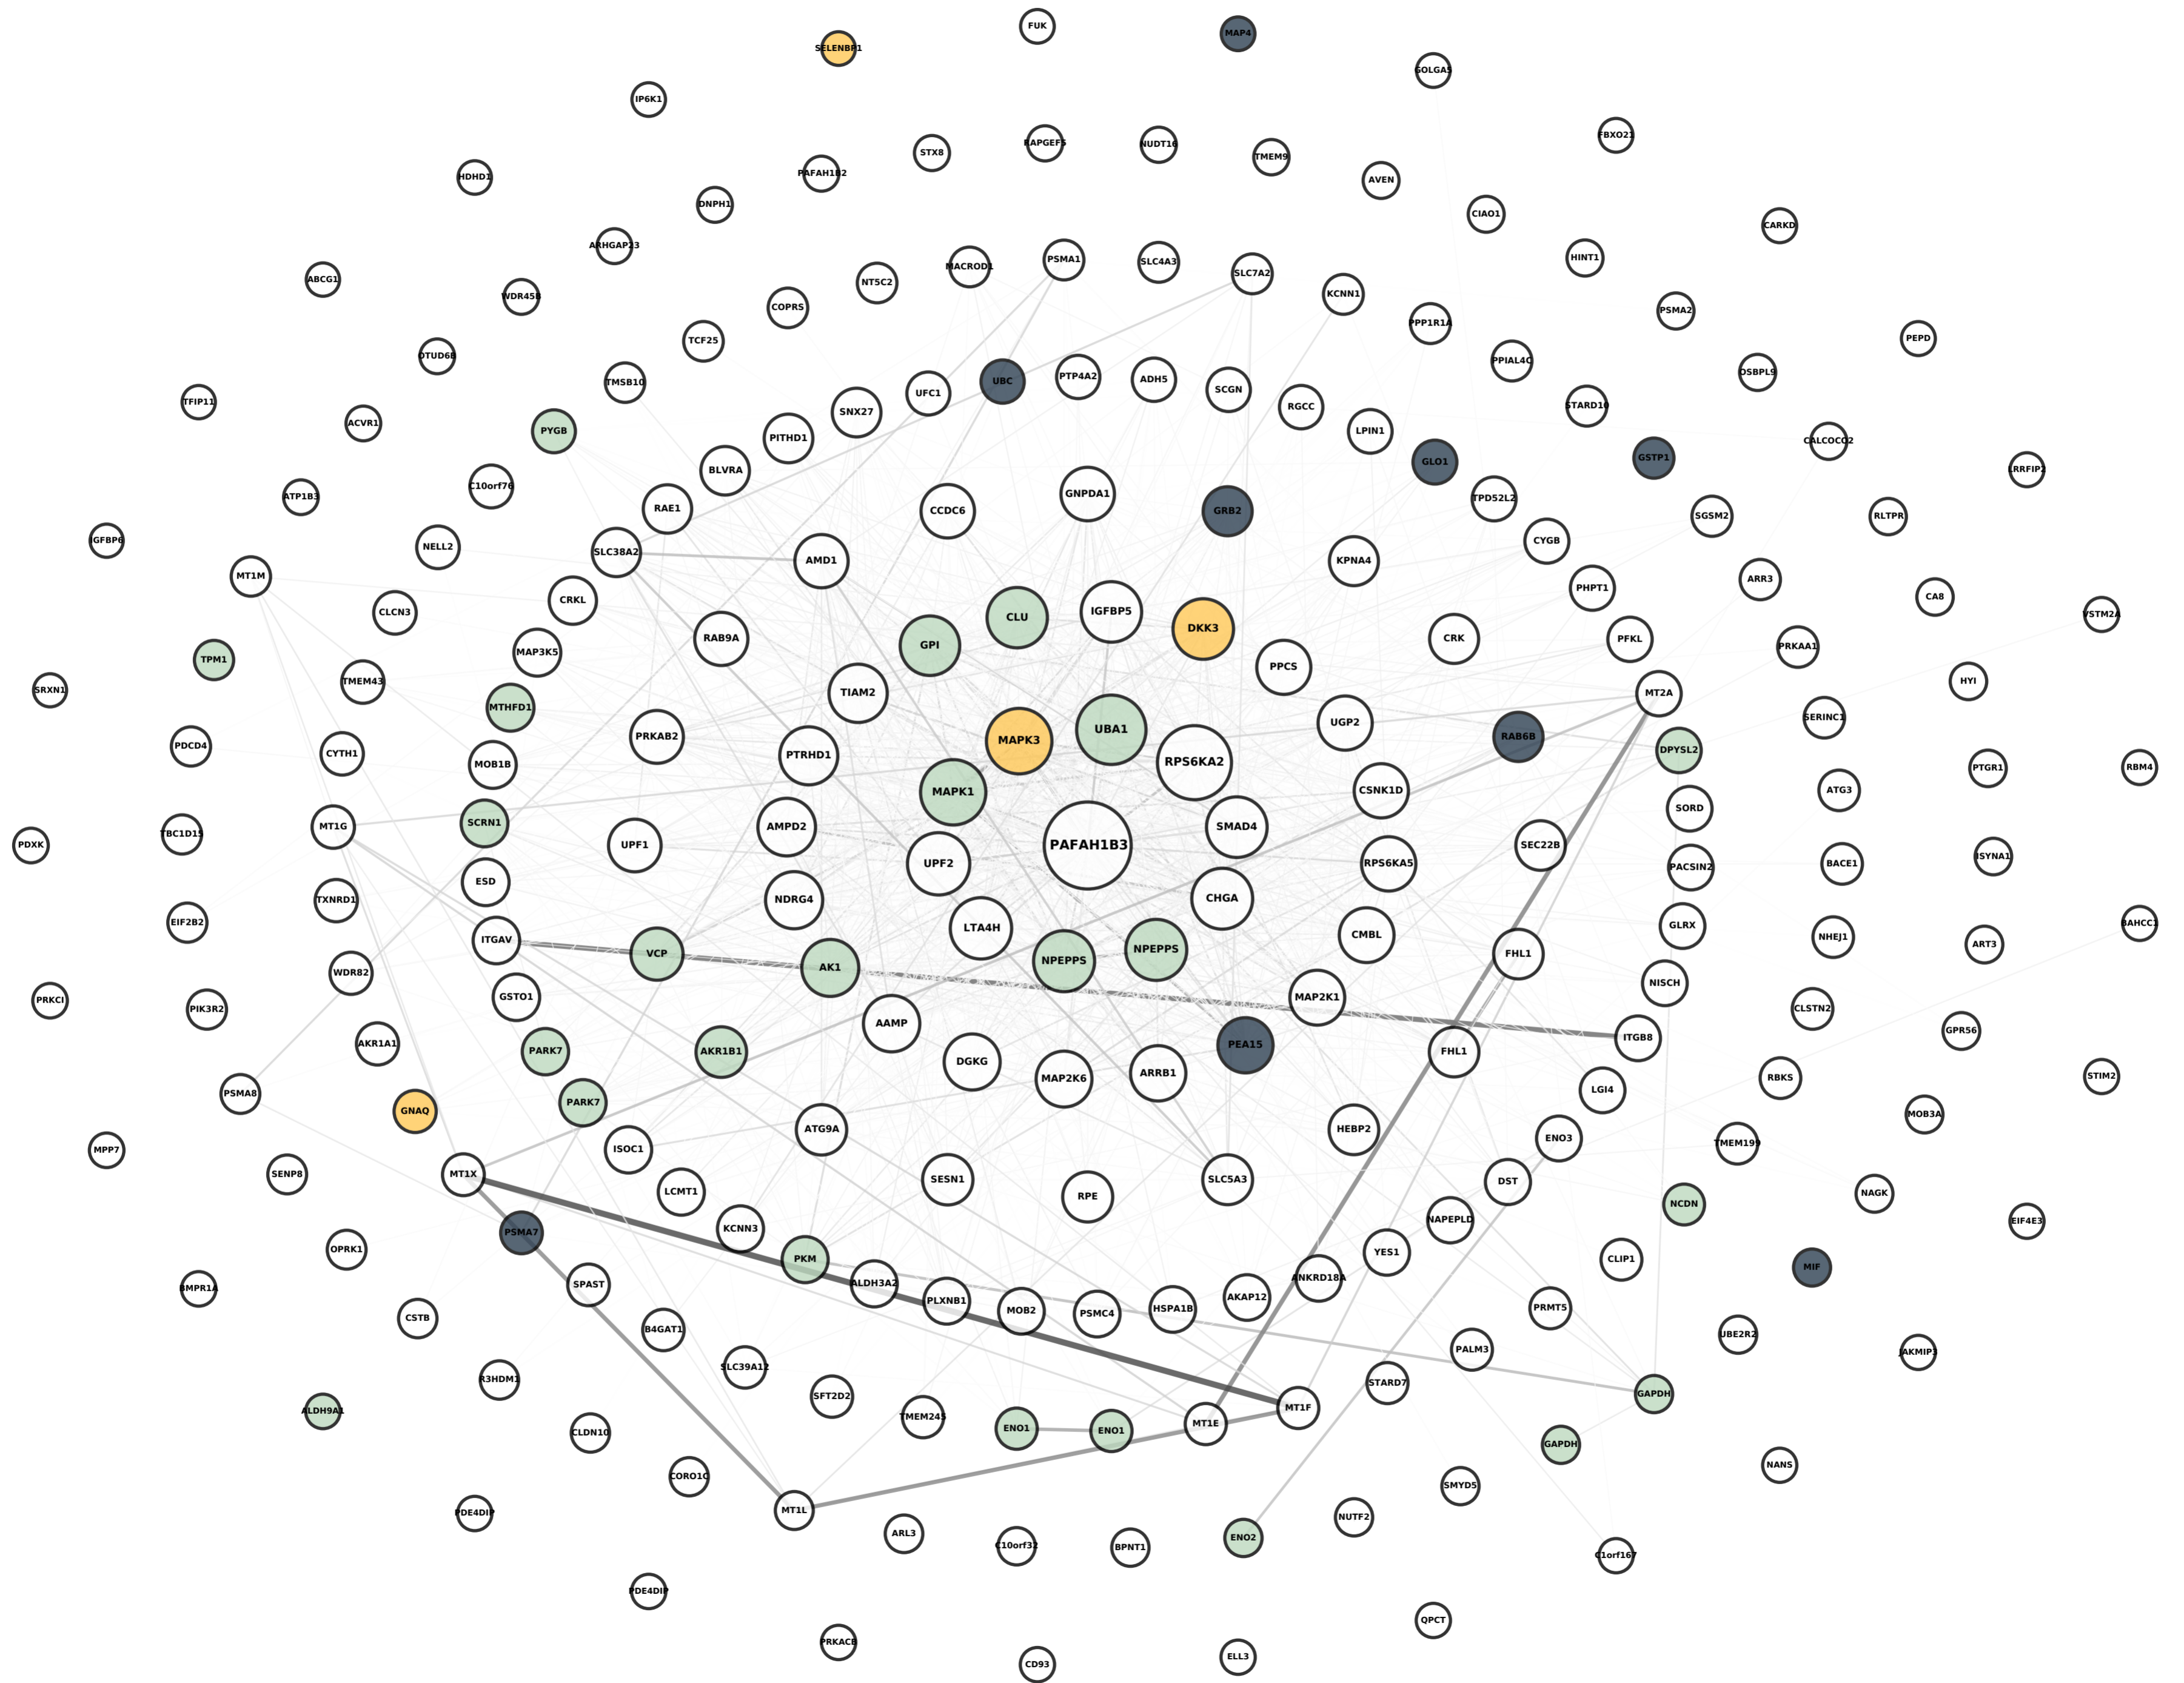







Module 9, n = 227,  
FDR Corrected pvalue 1

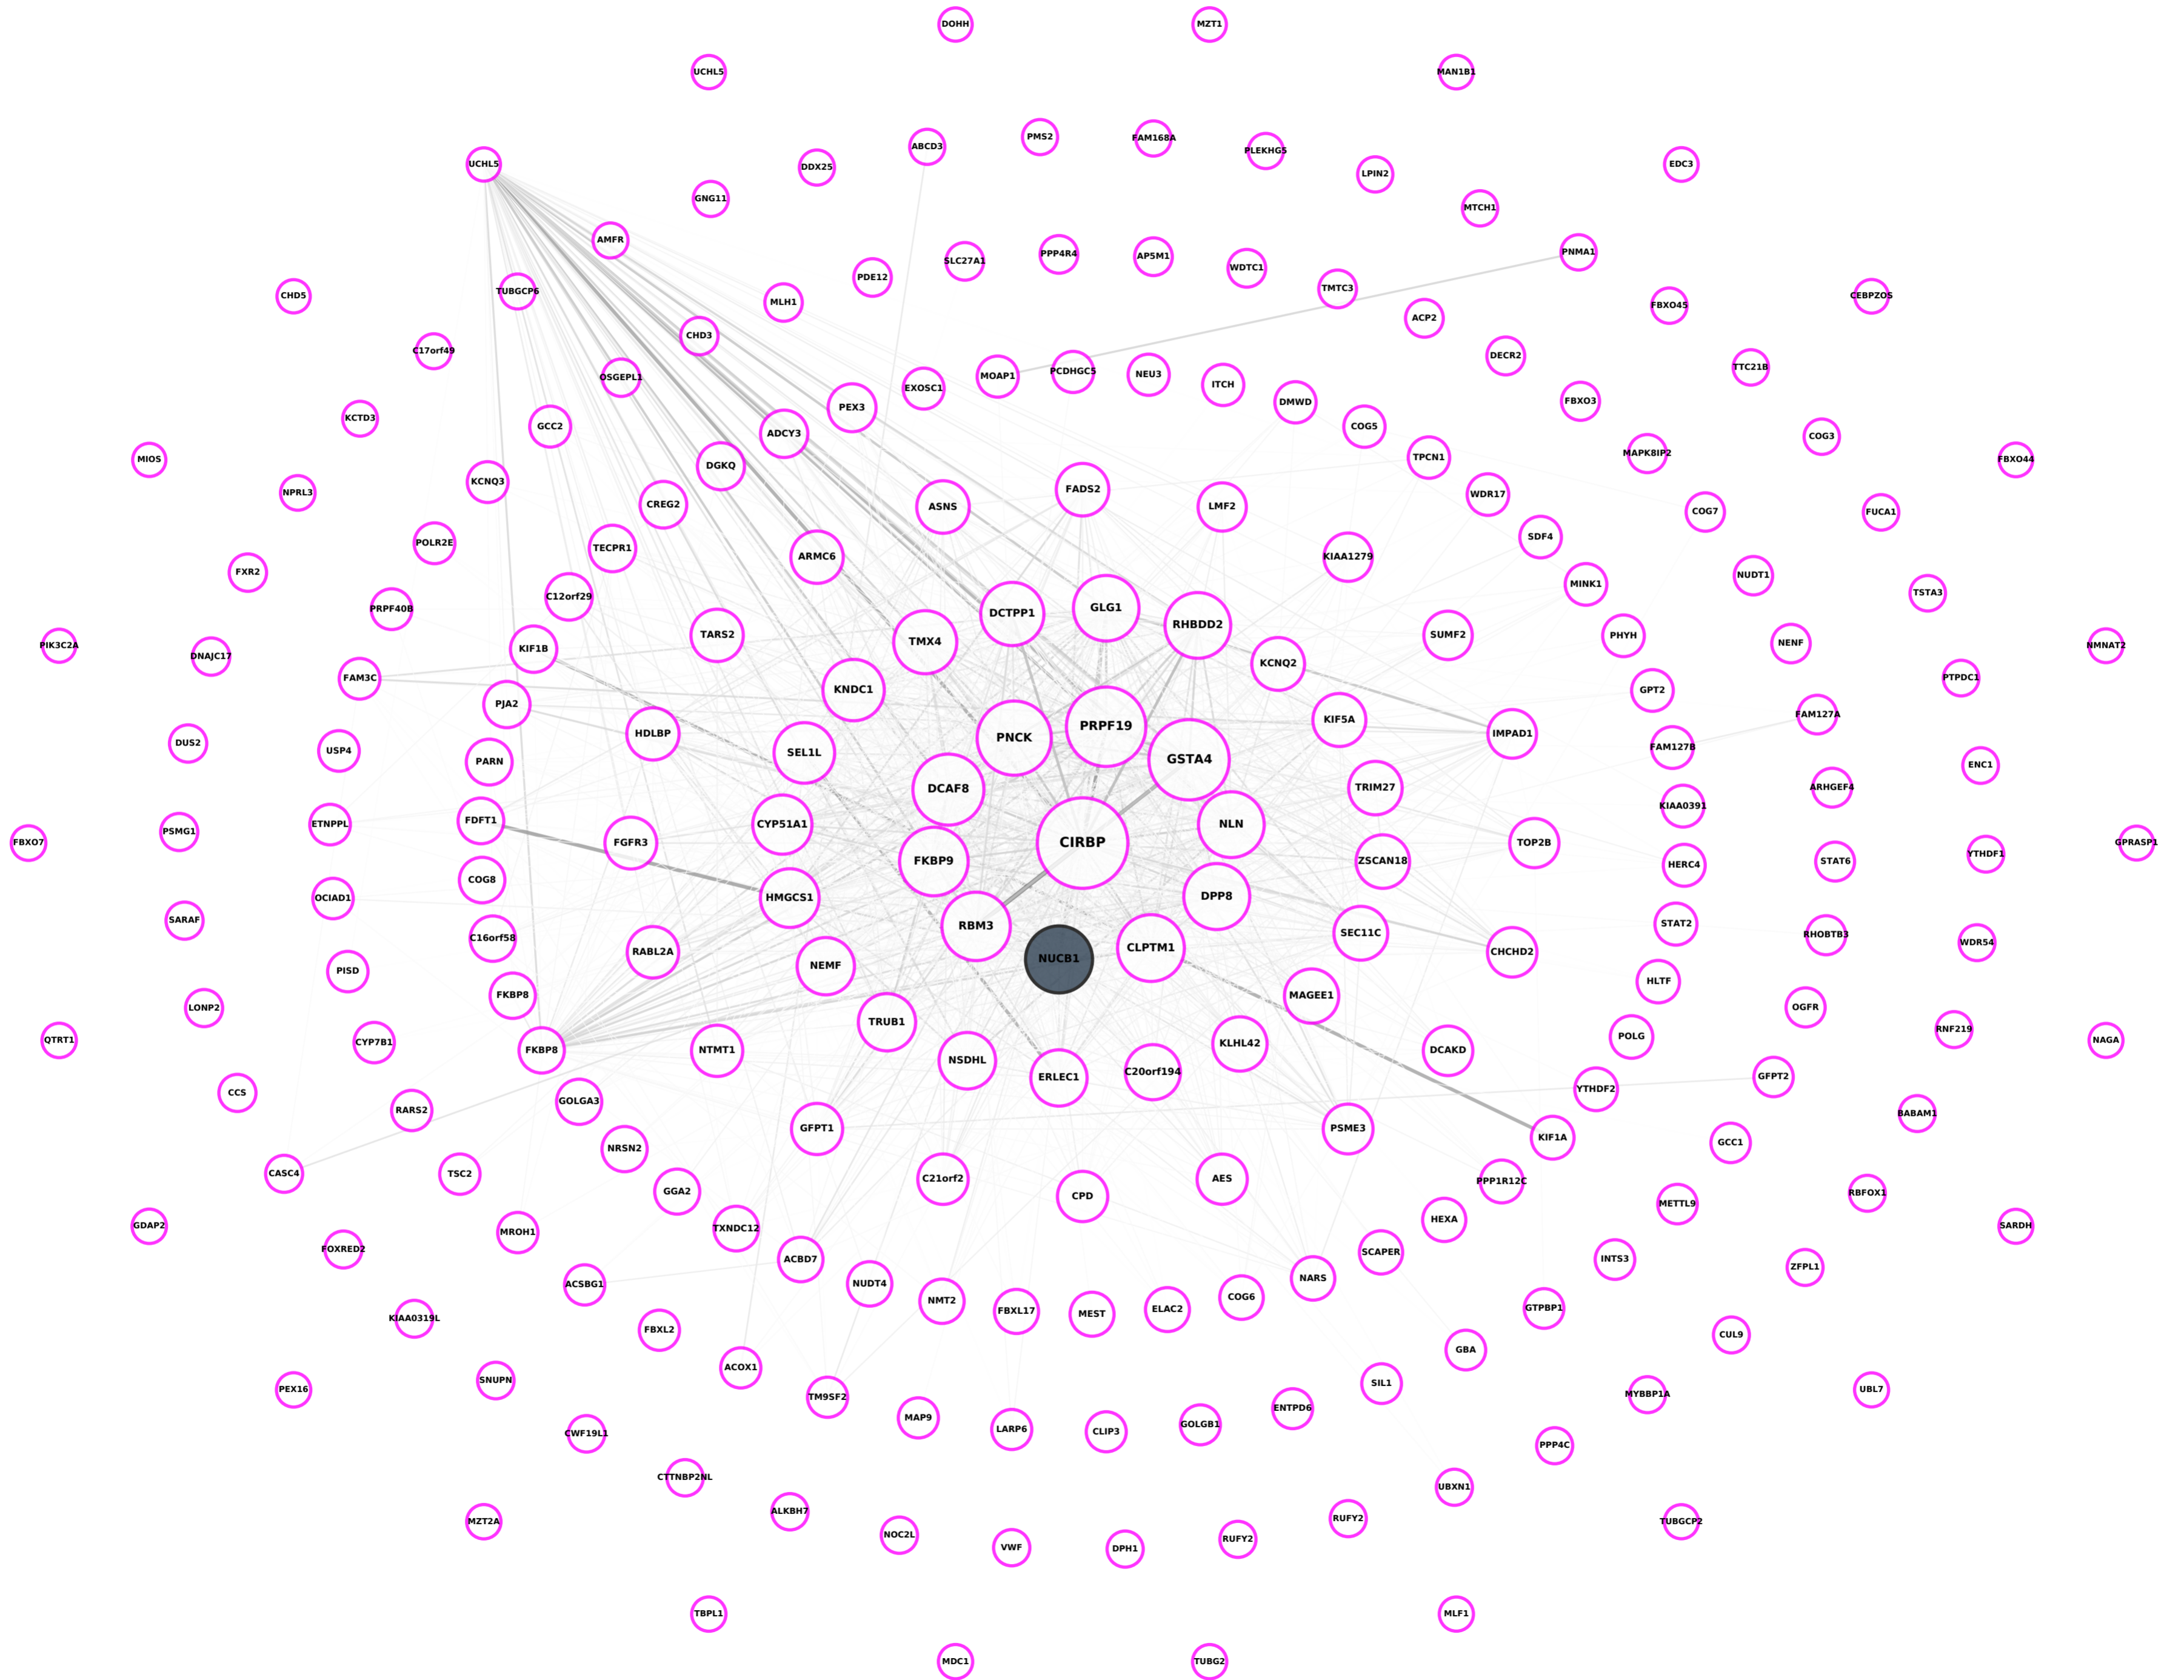



Module 10, n = 200,  
FDR Corrected pvalue 1

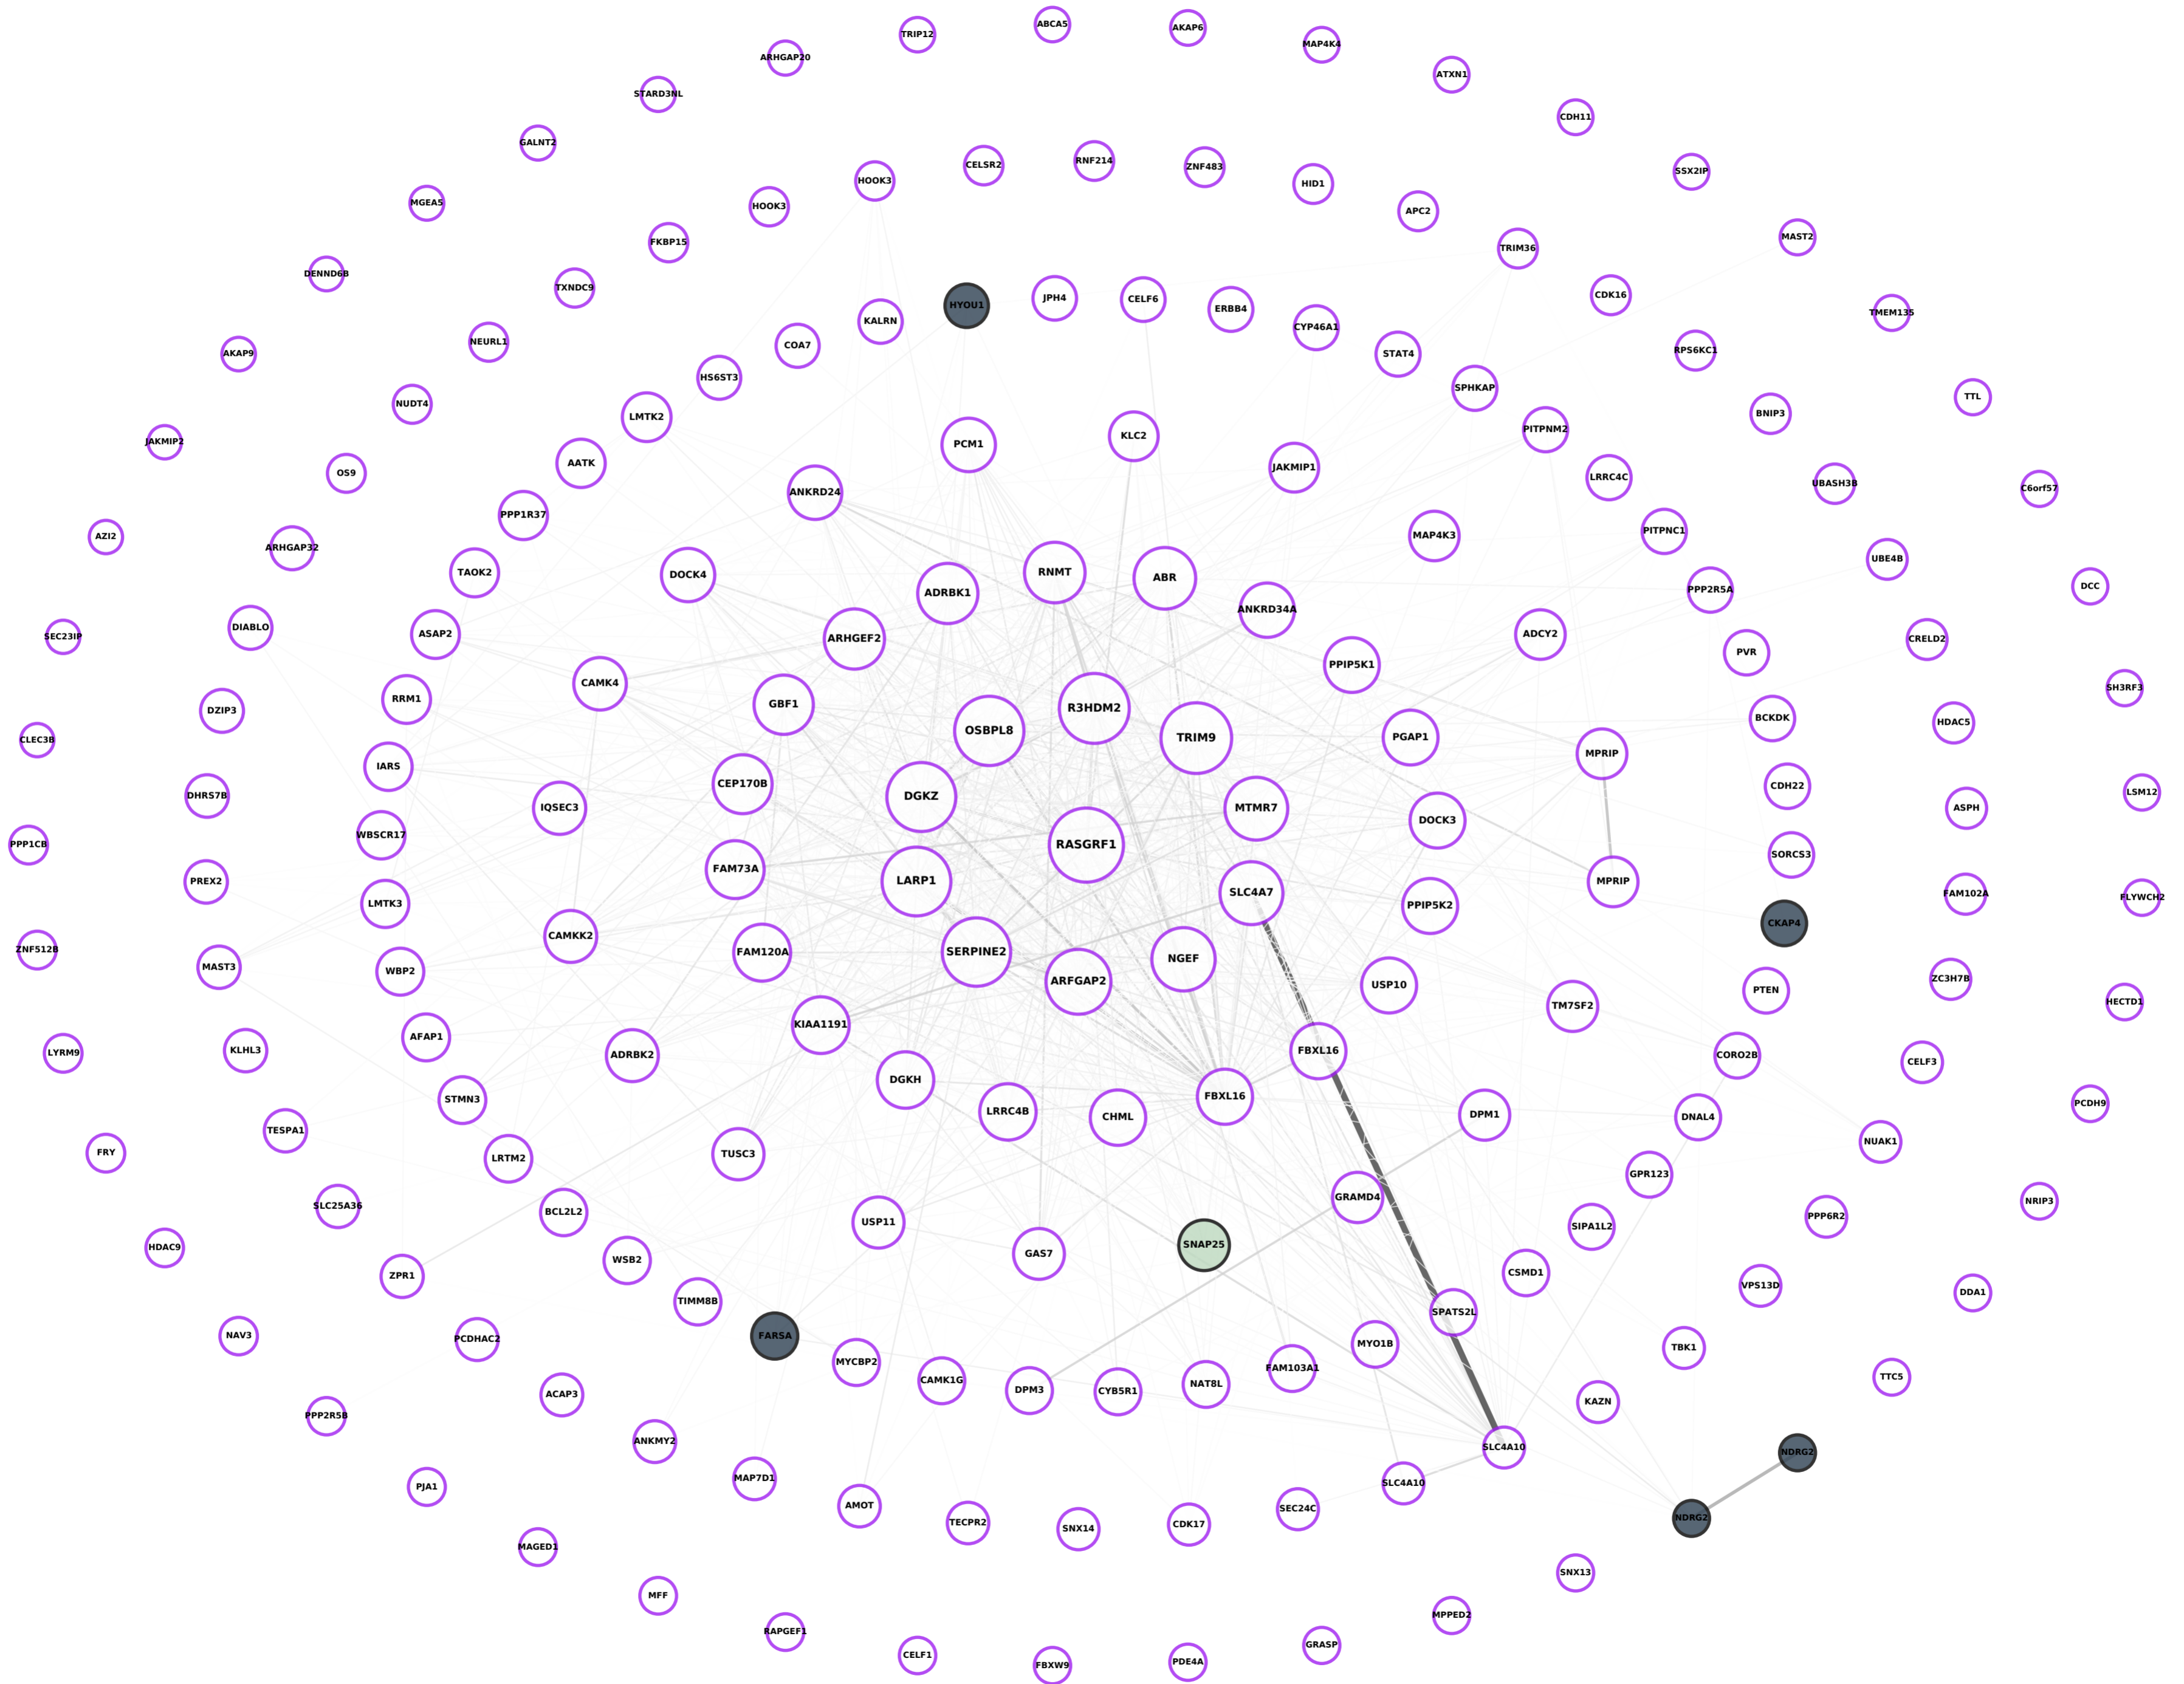



Module 11, n = 198,  
FDR Corrected pvalue 0.094128

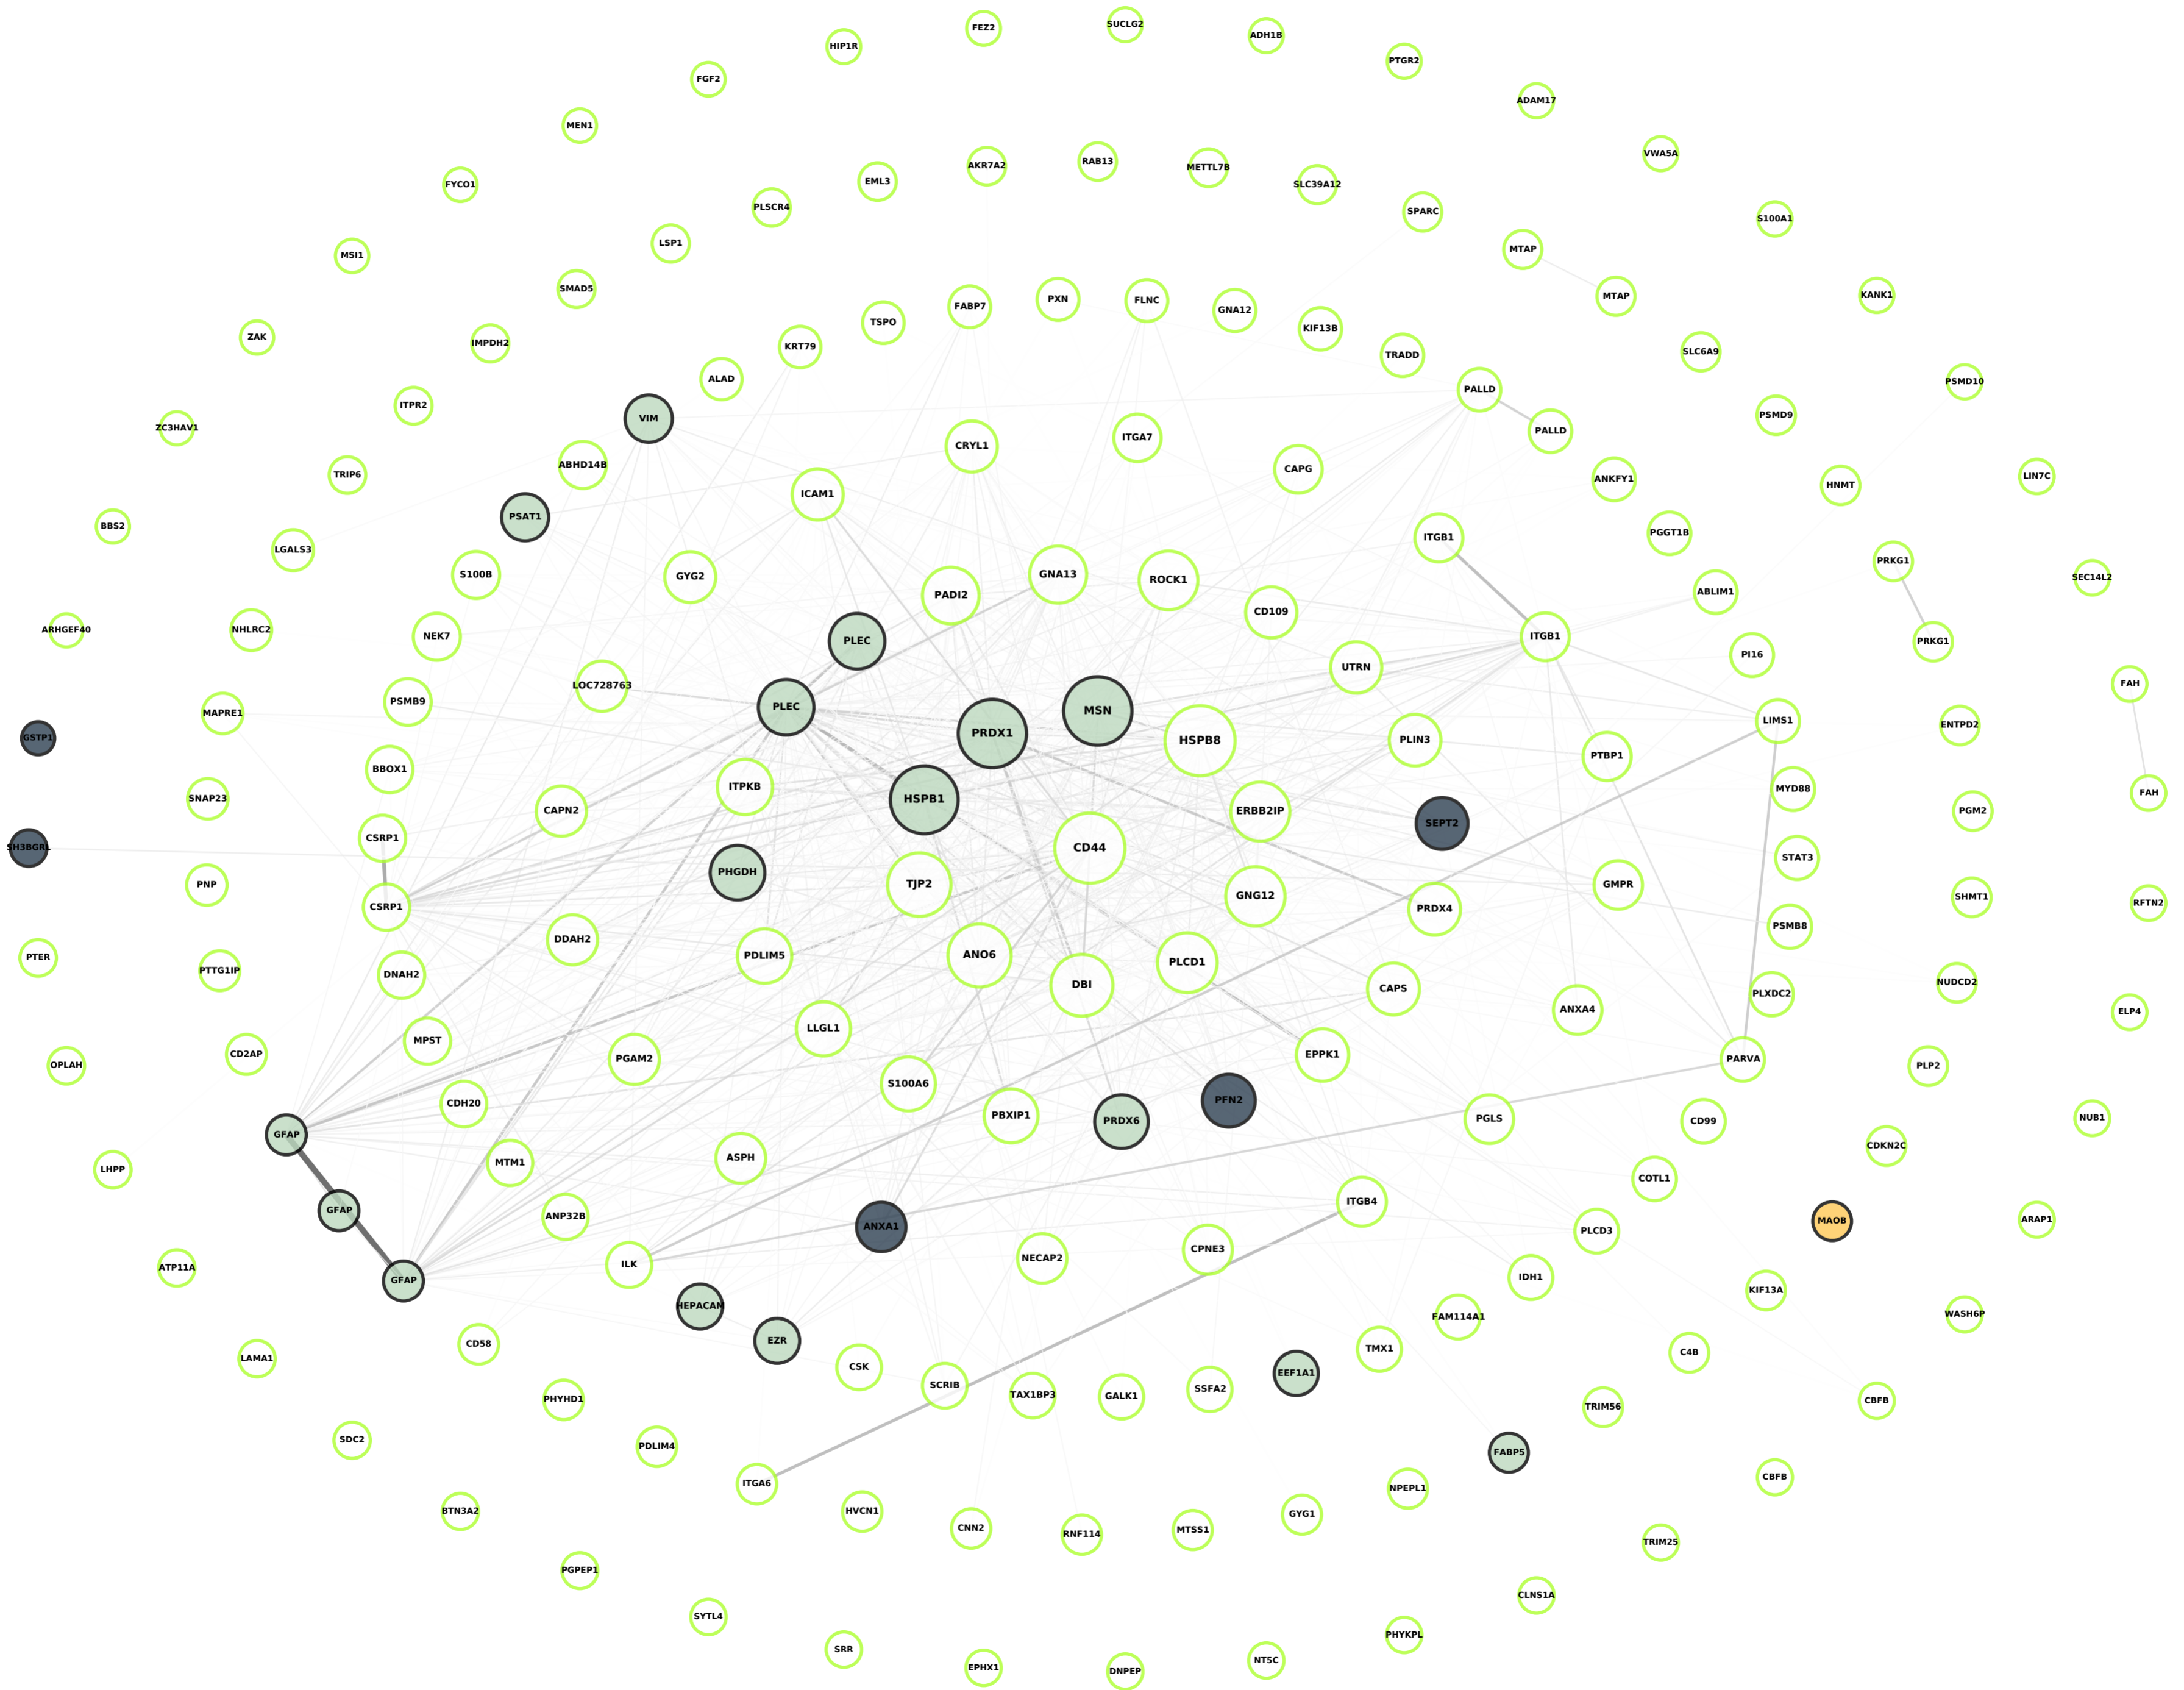



Module 12, n = 164,  
FDR Corrected pvalue 1

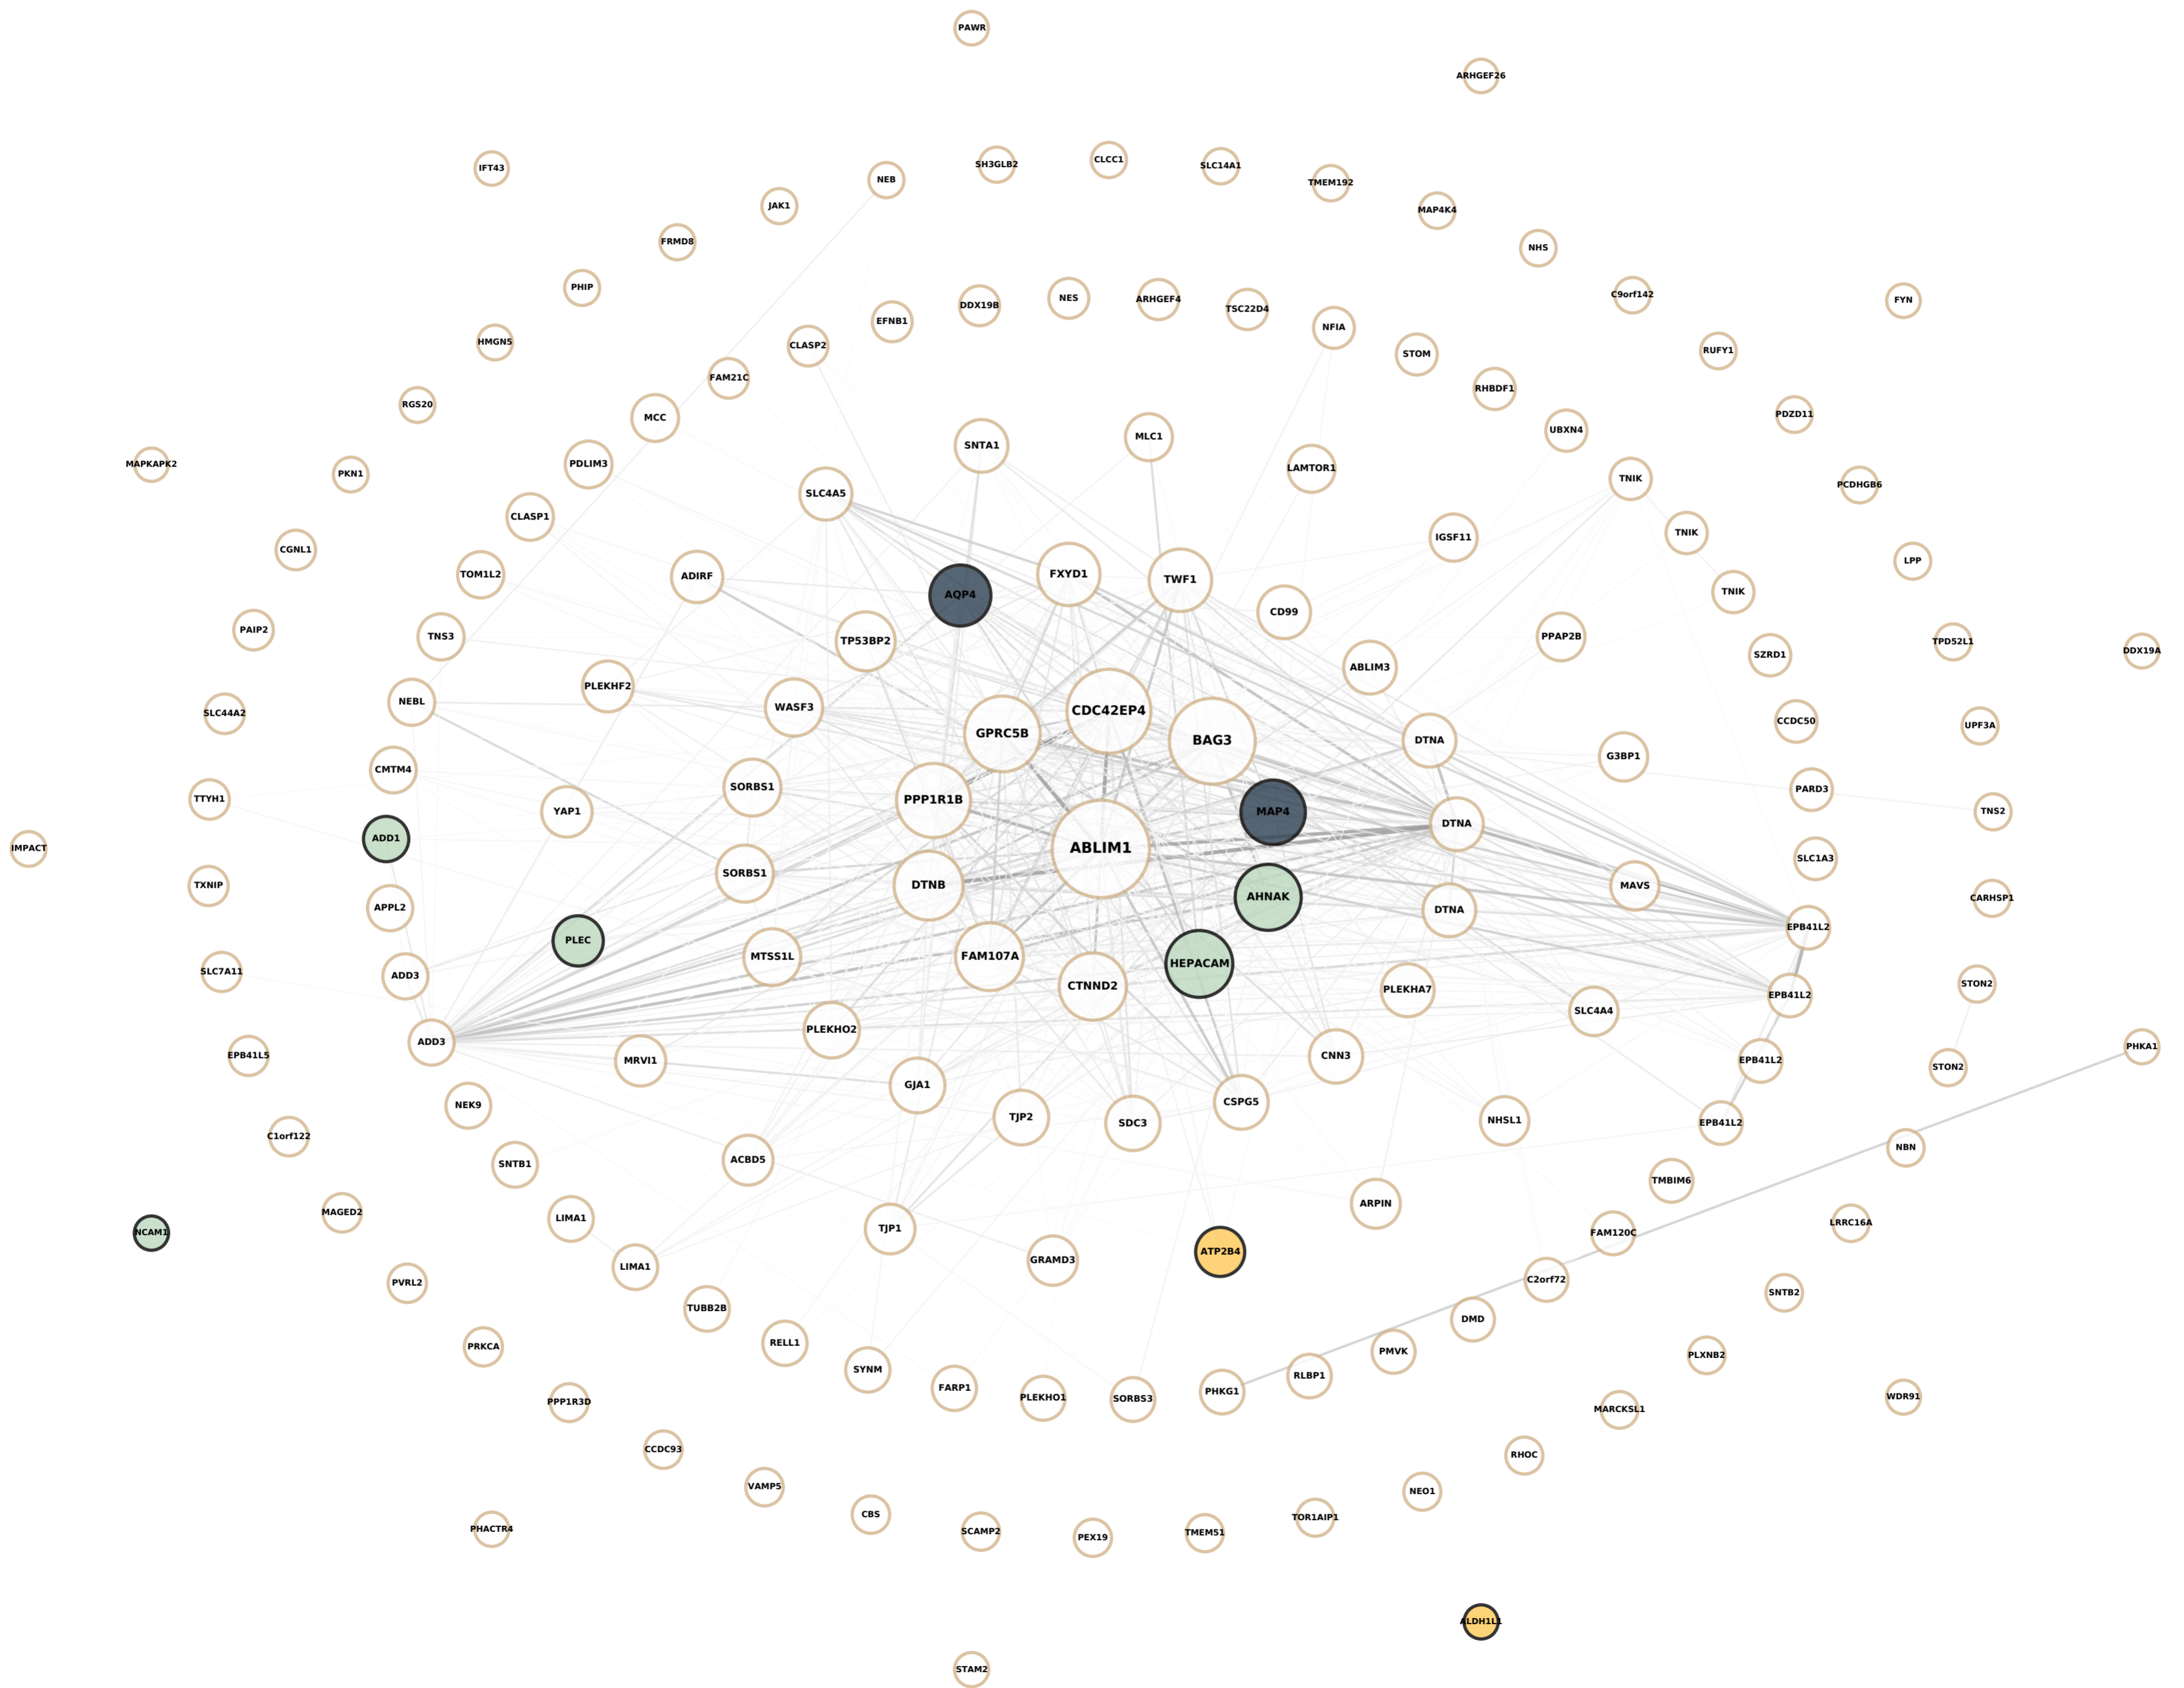

Module 13, n = 162,  
FDR Corrected pvalue 1.1211e-05

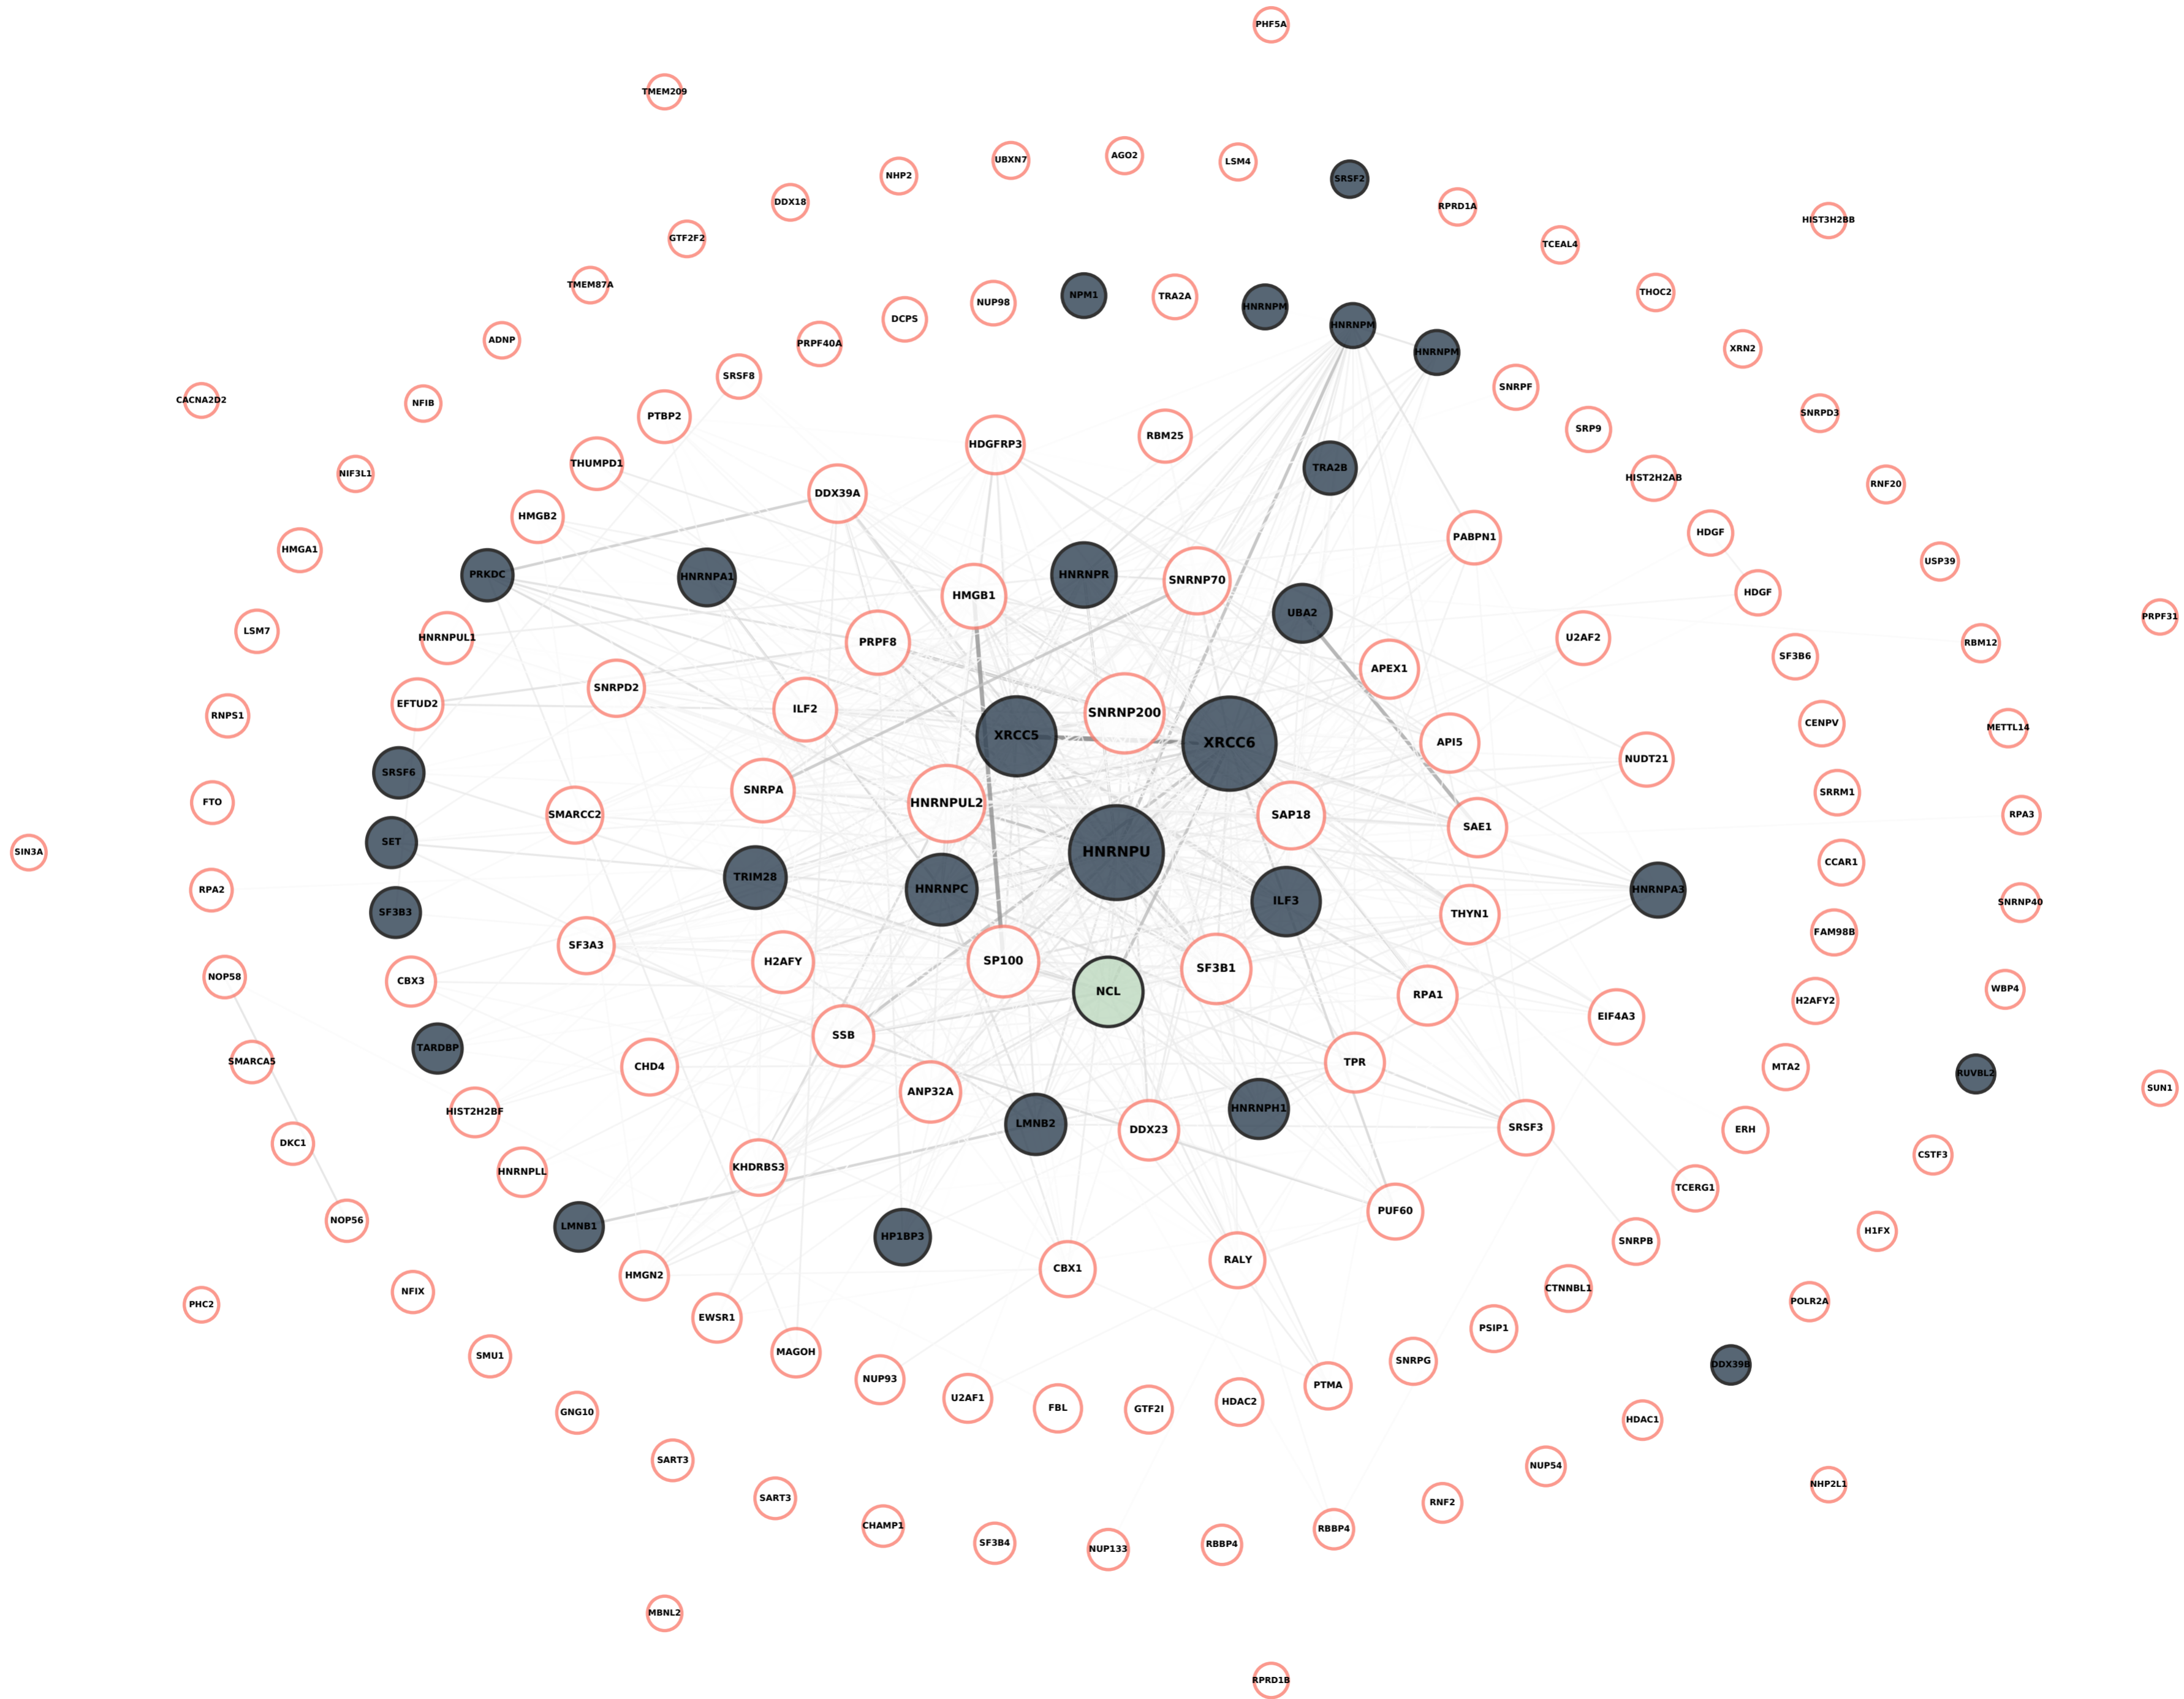



Module 14, n = 162,  
FDR Corrected pvalue 4.448e-14

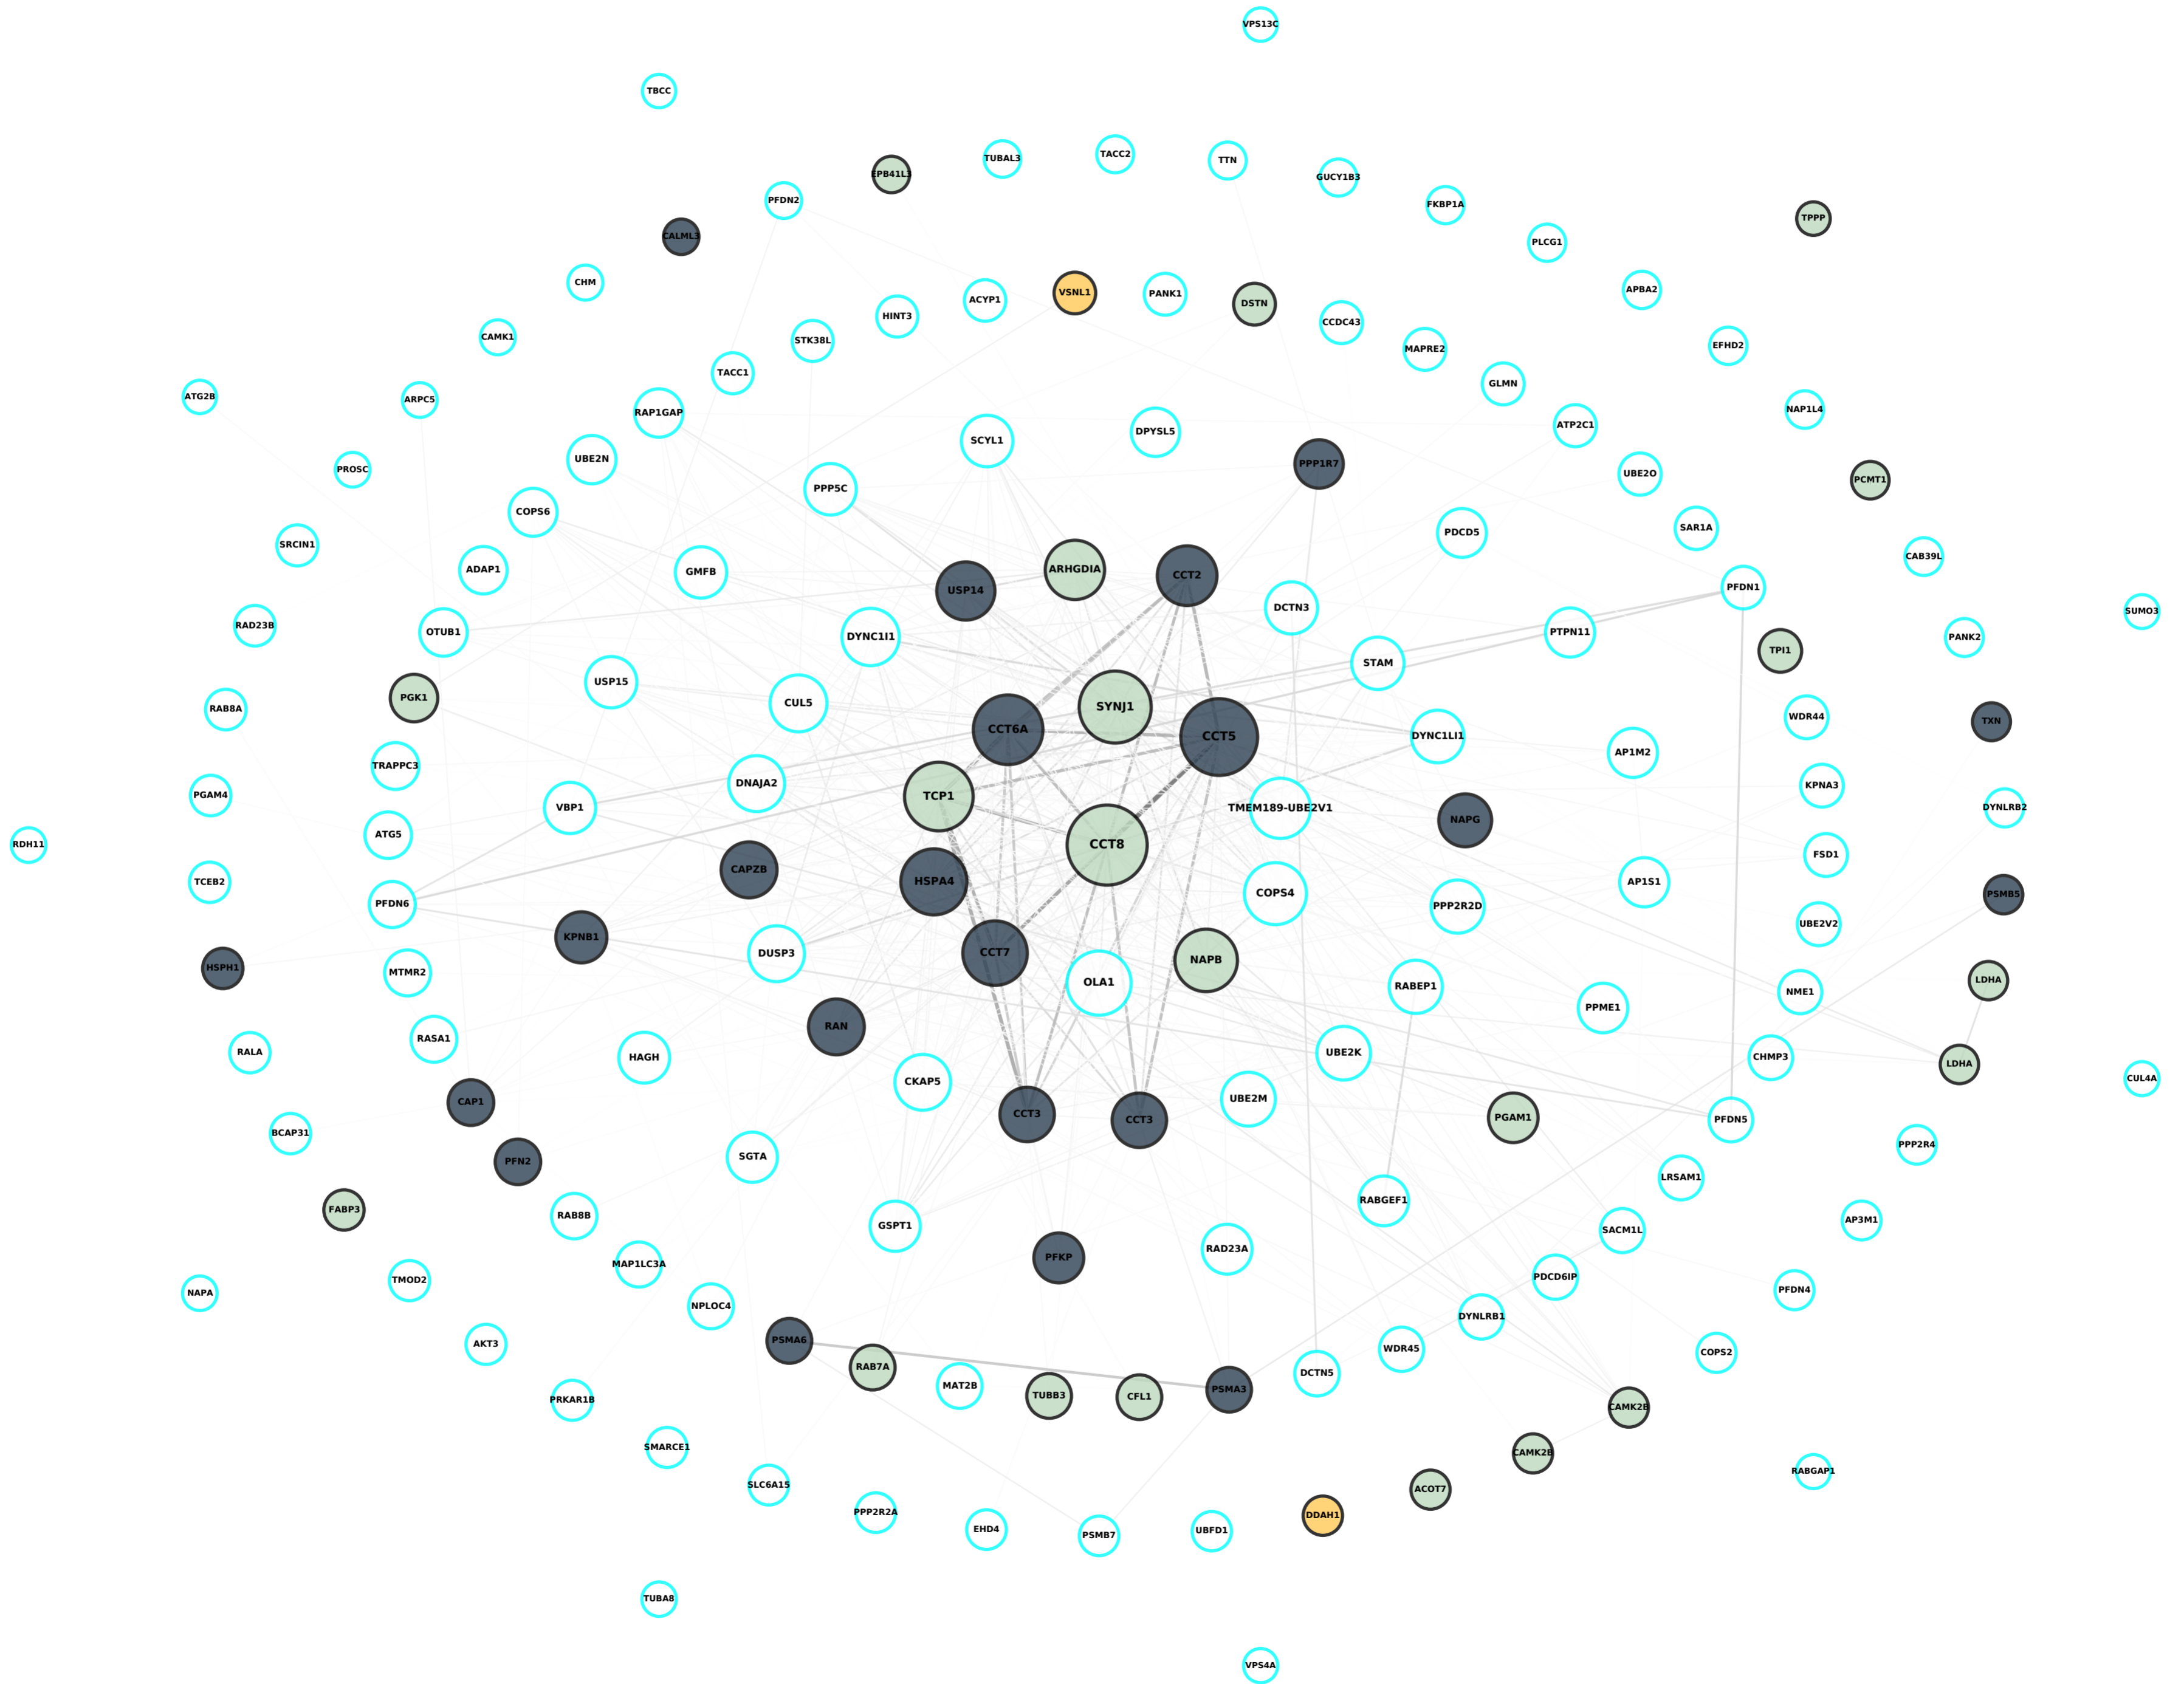

Module 15, n = 158,  
FDR Corrected pvalue 0.15687

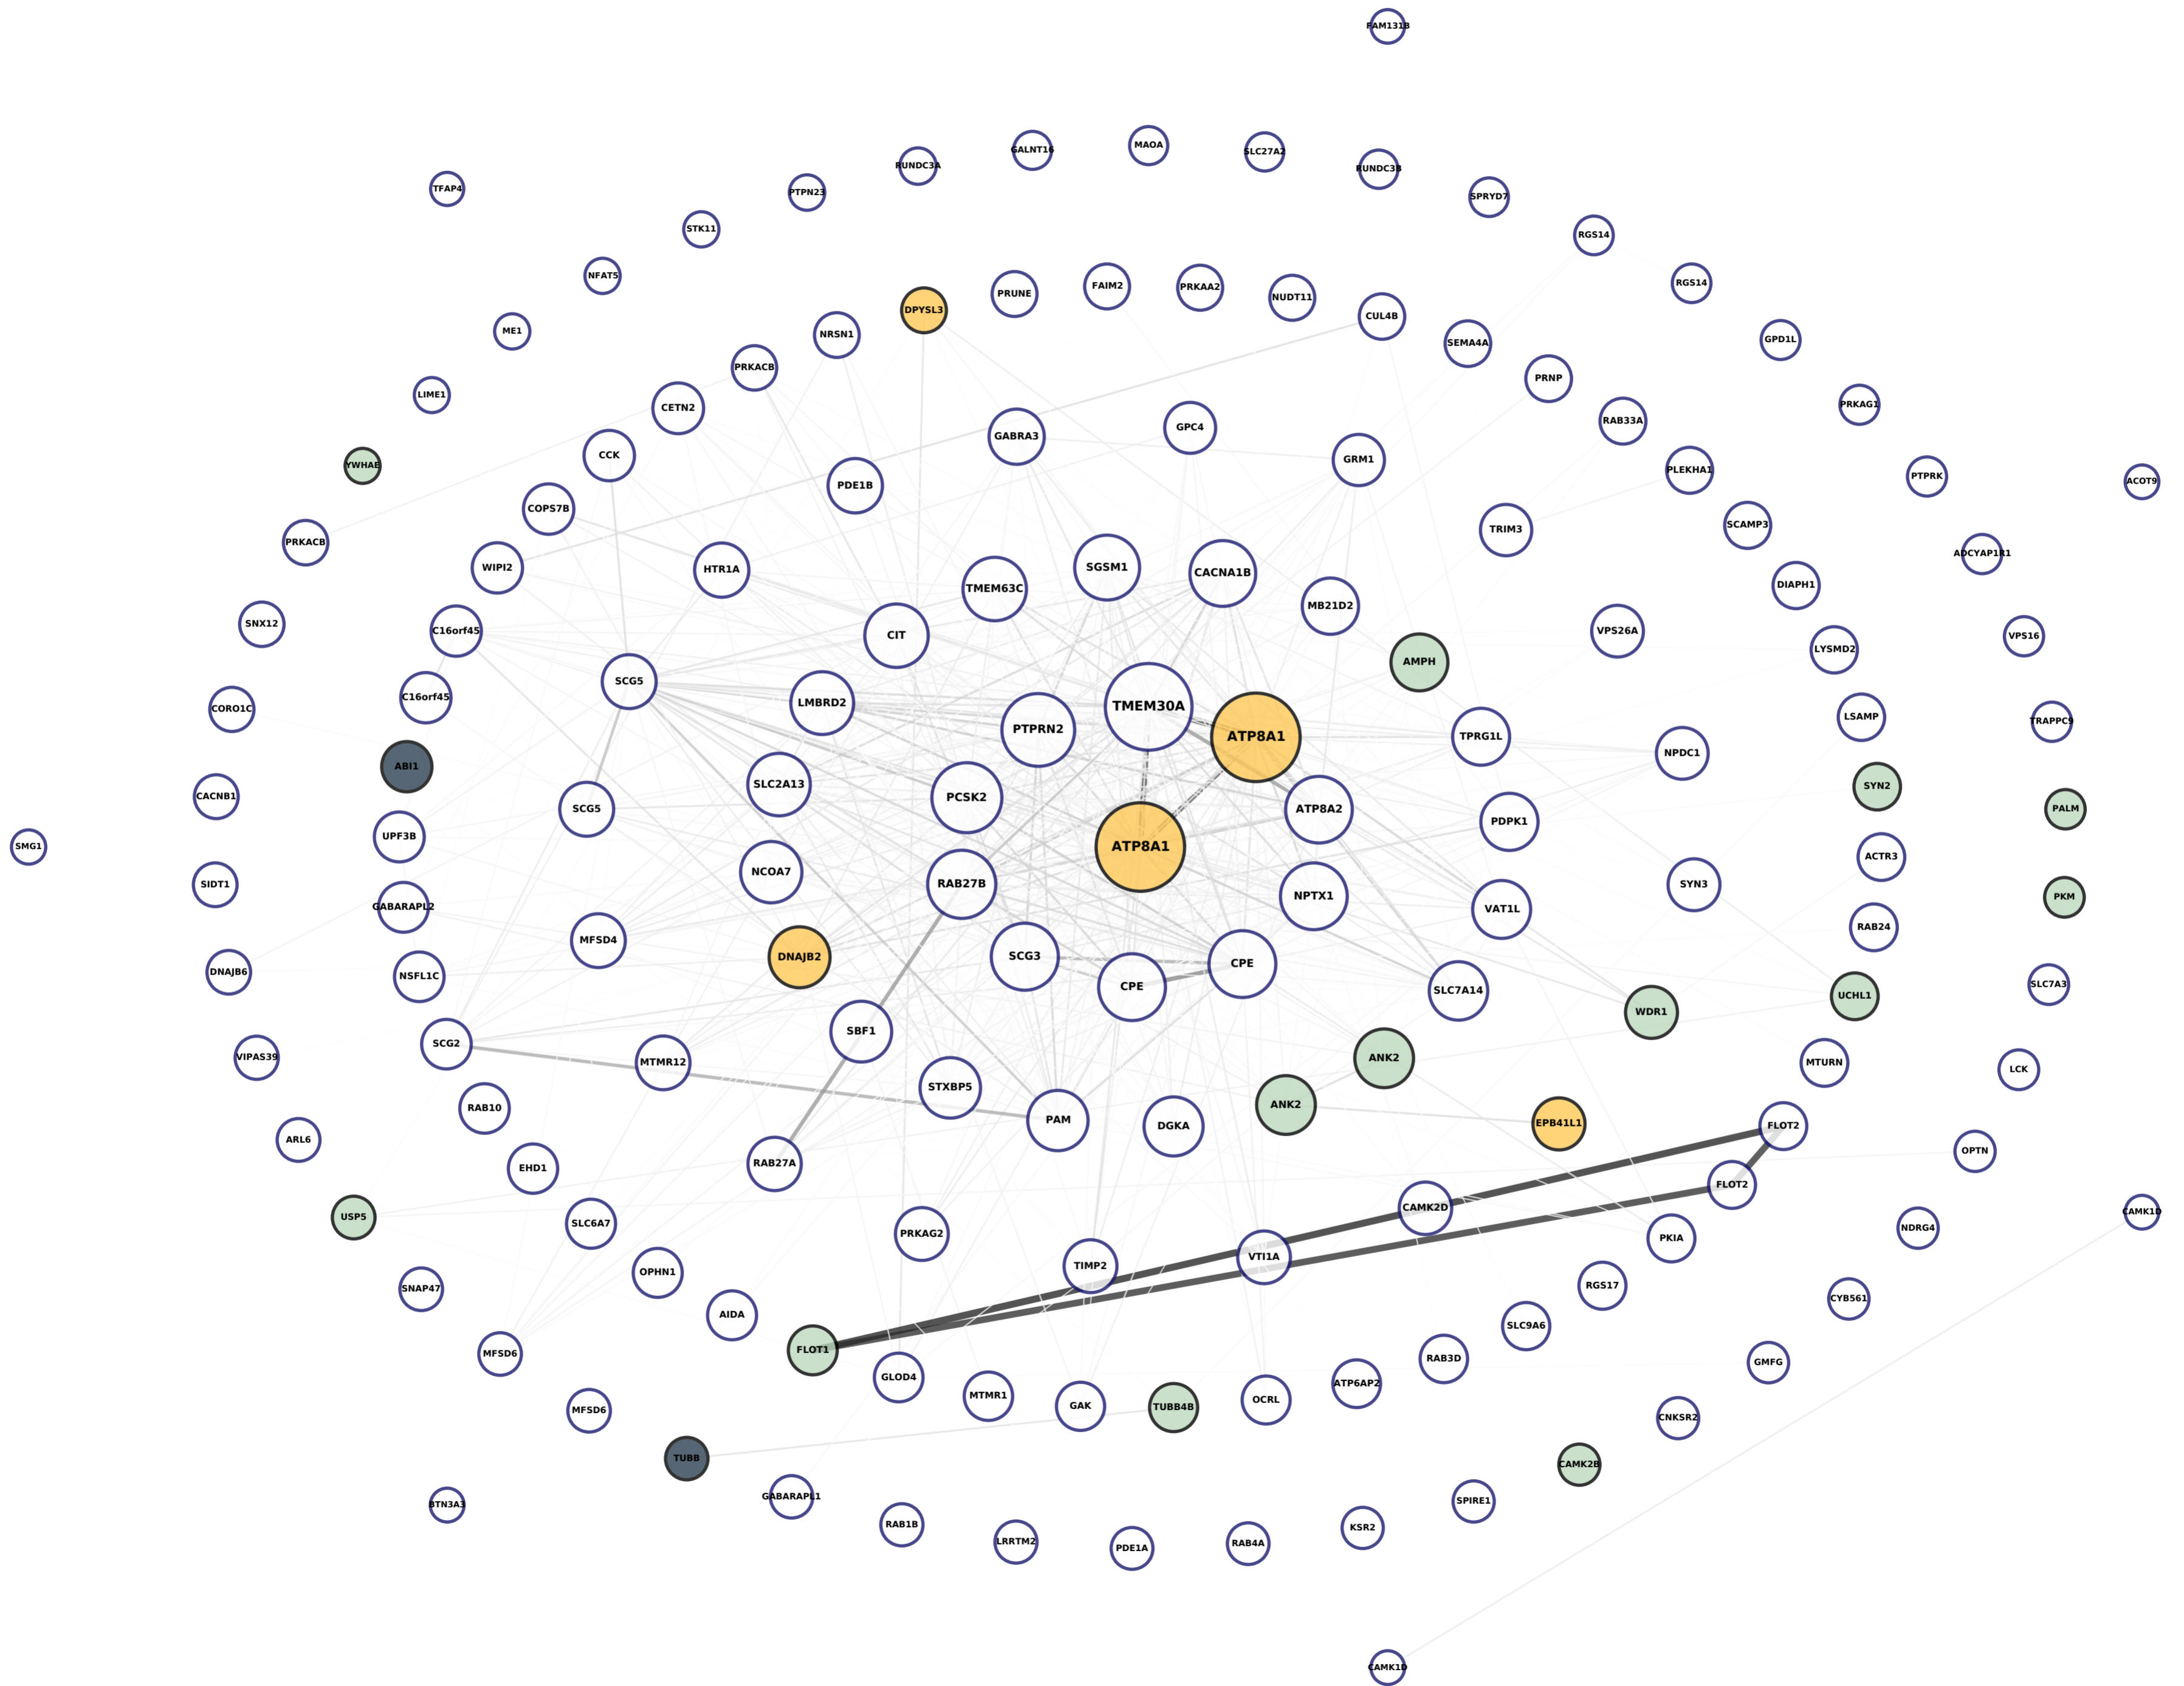



Module 16, n = 154,  
FDR Corrected pvalue 1

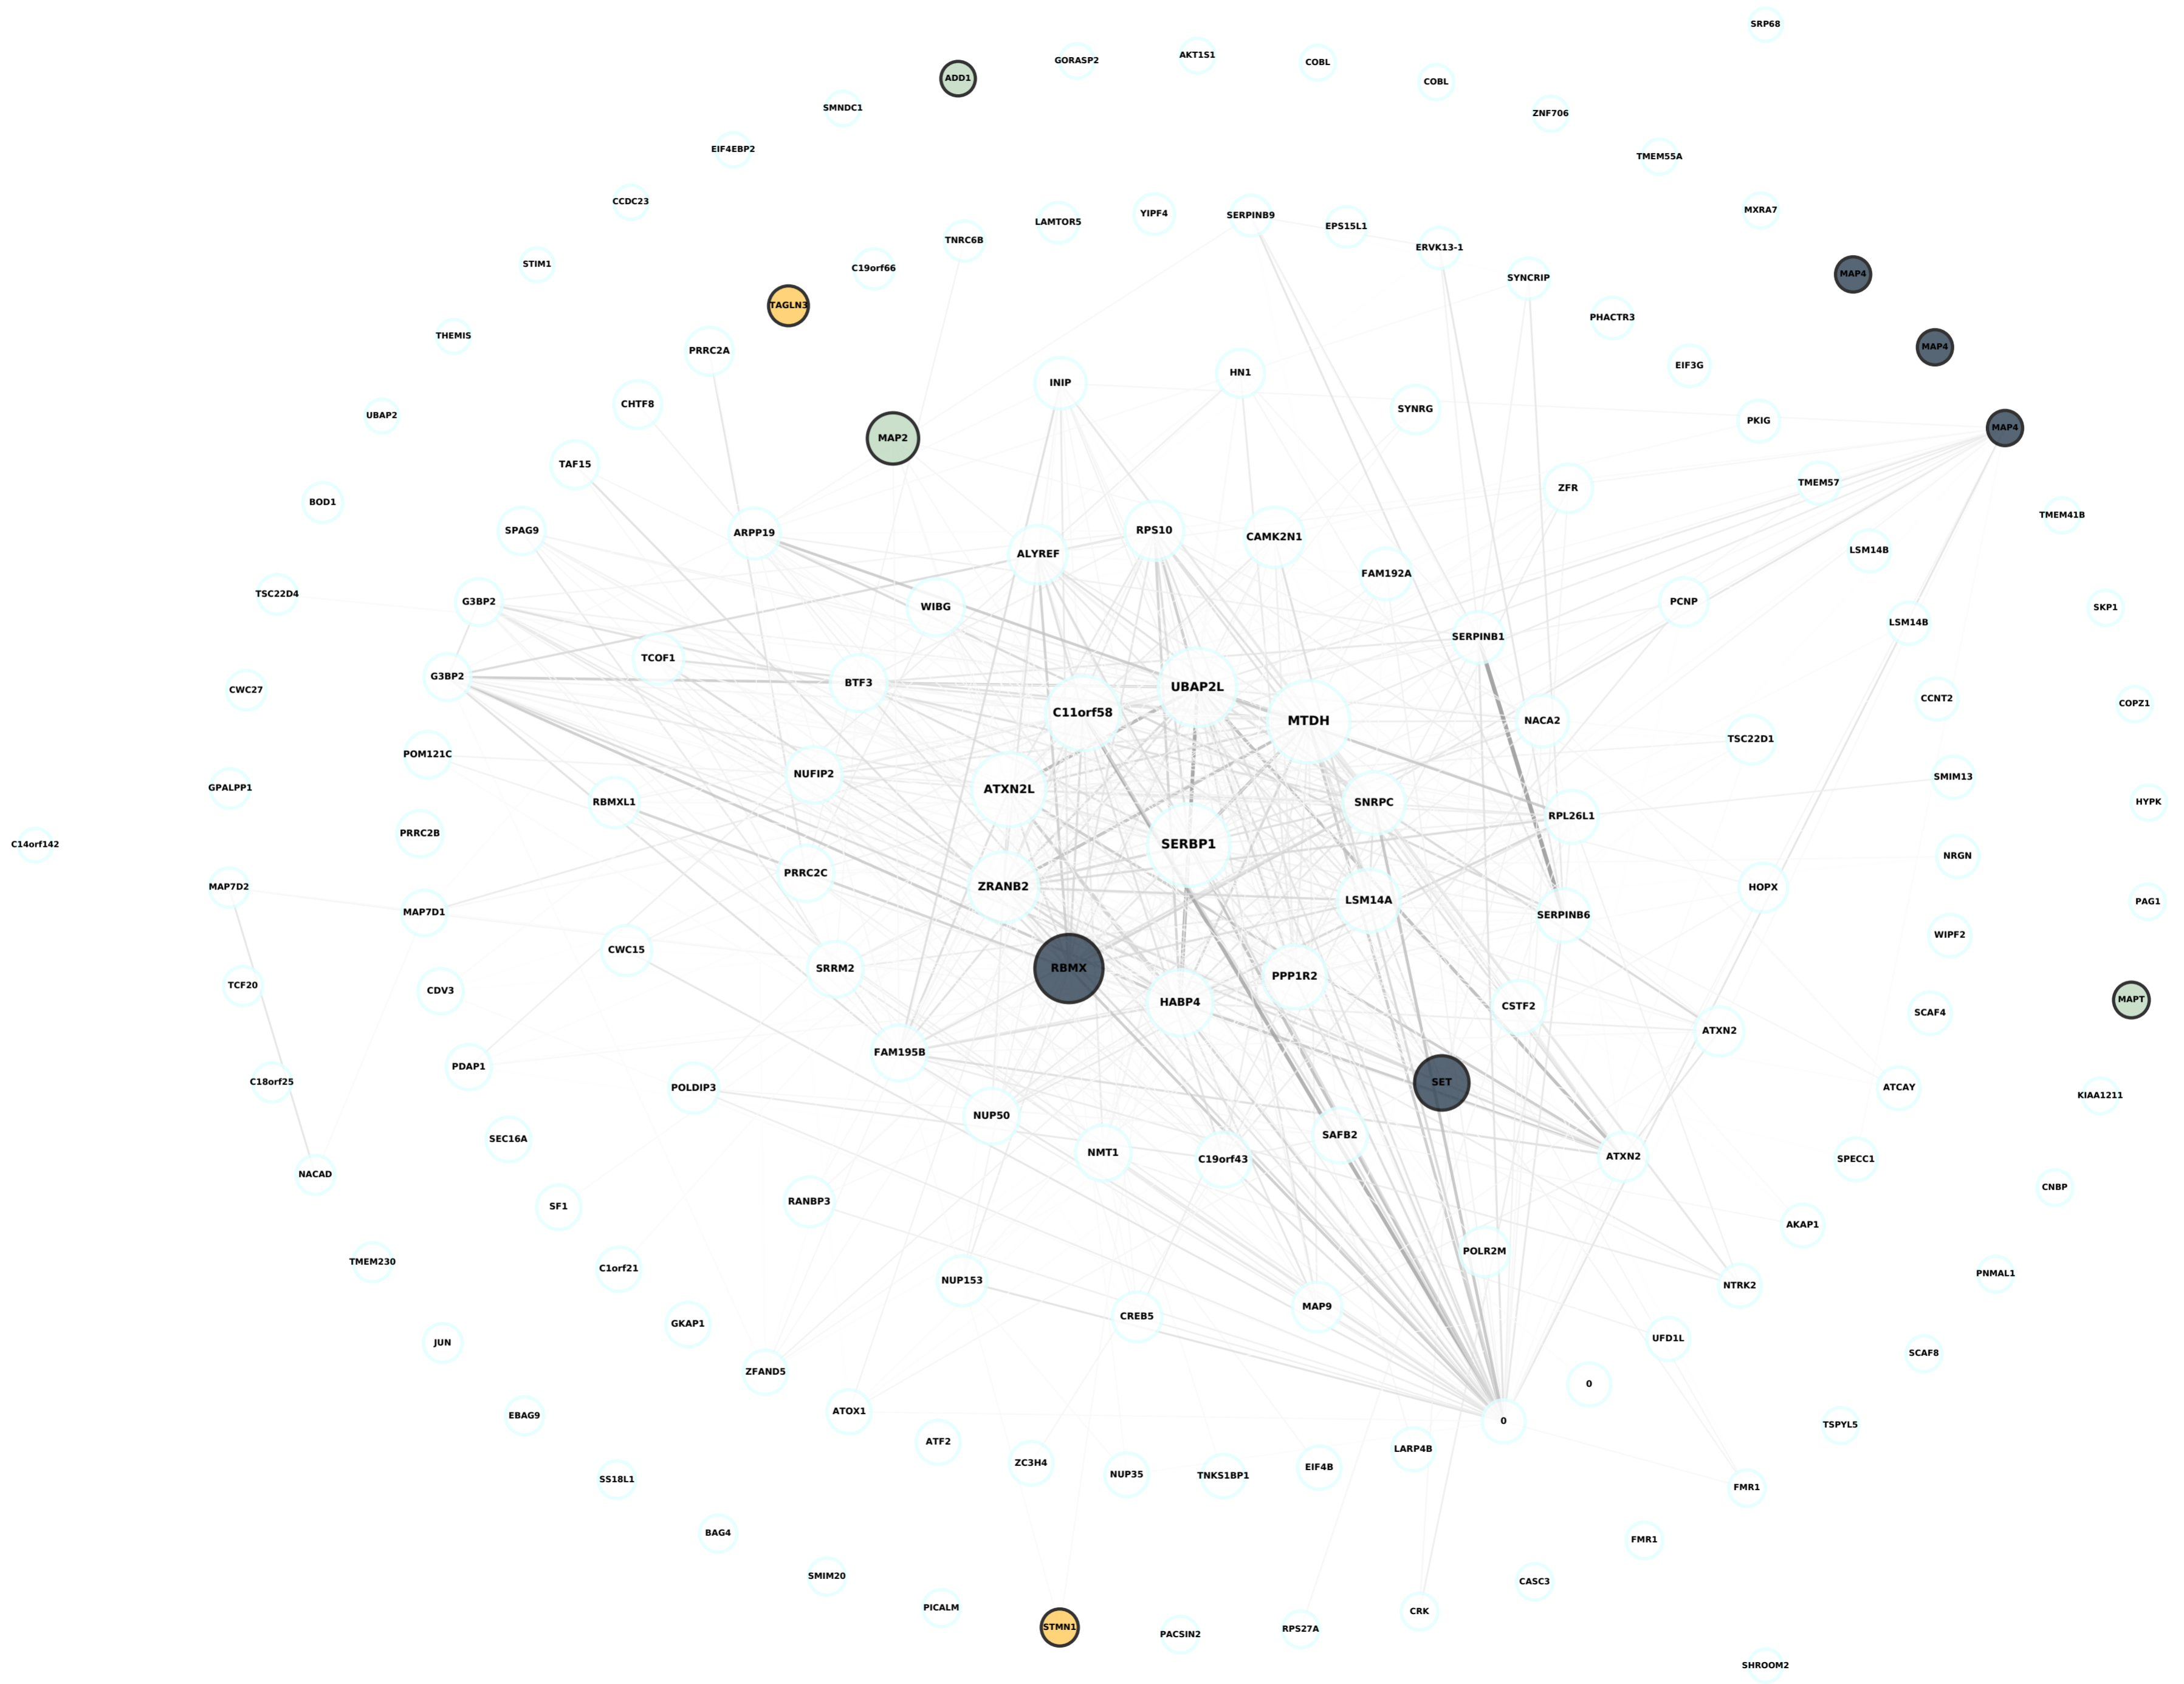

Module 17, n = 153,  
FDR Corrected pvalue 1

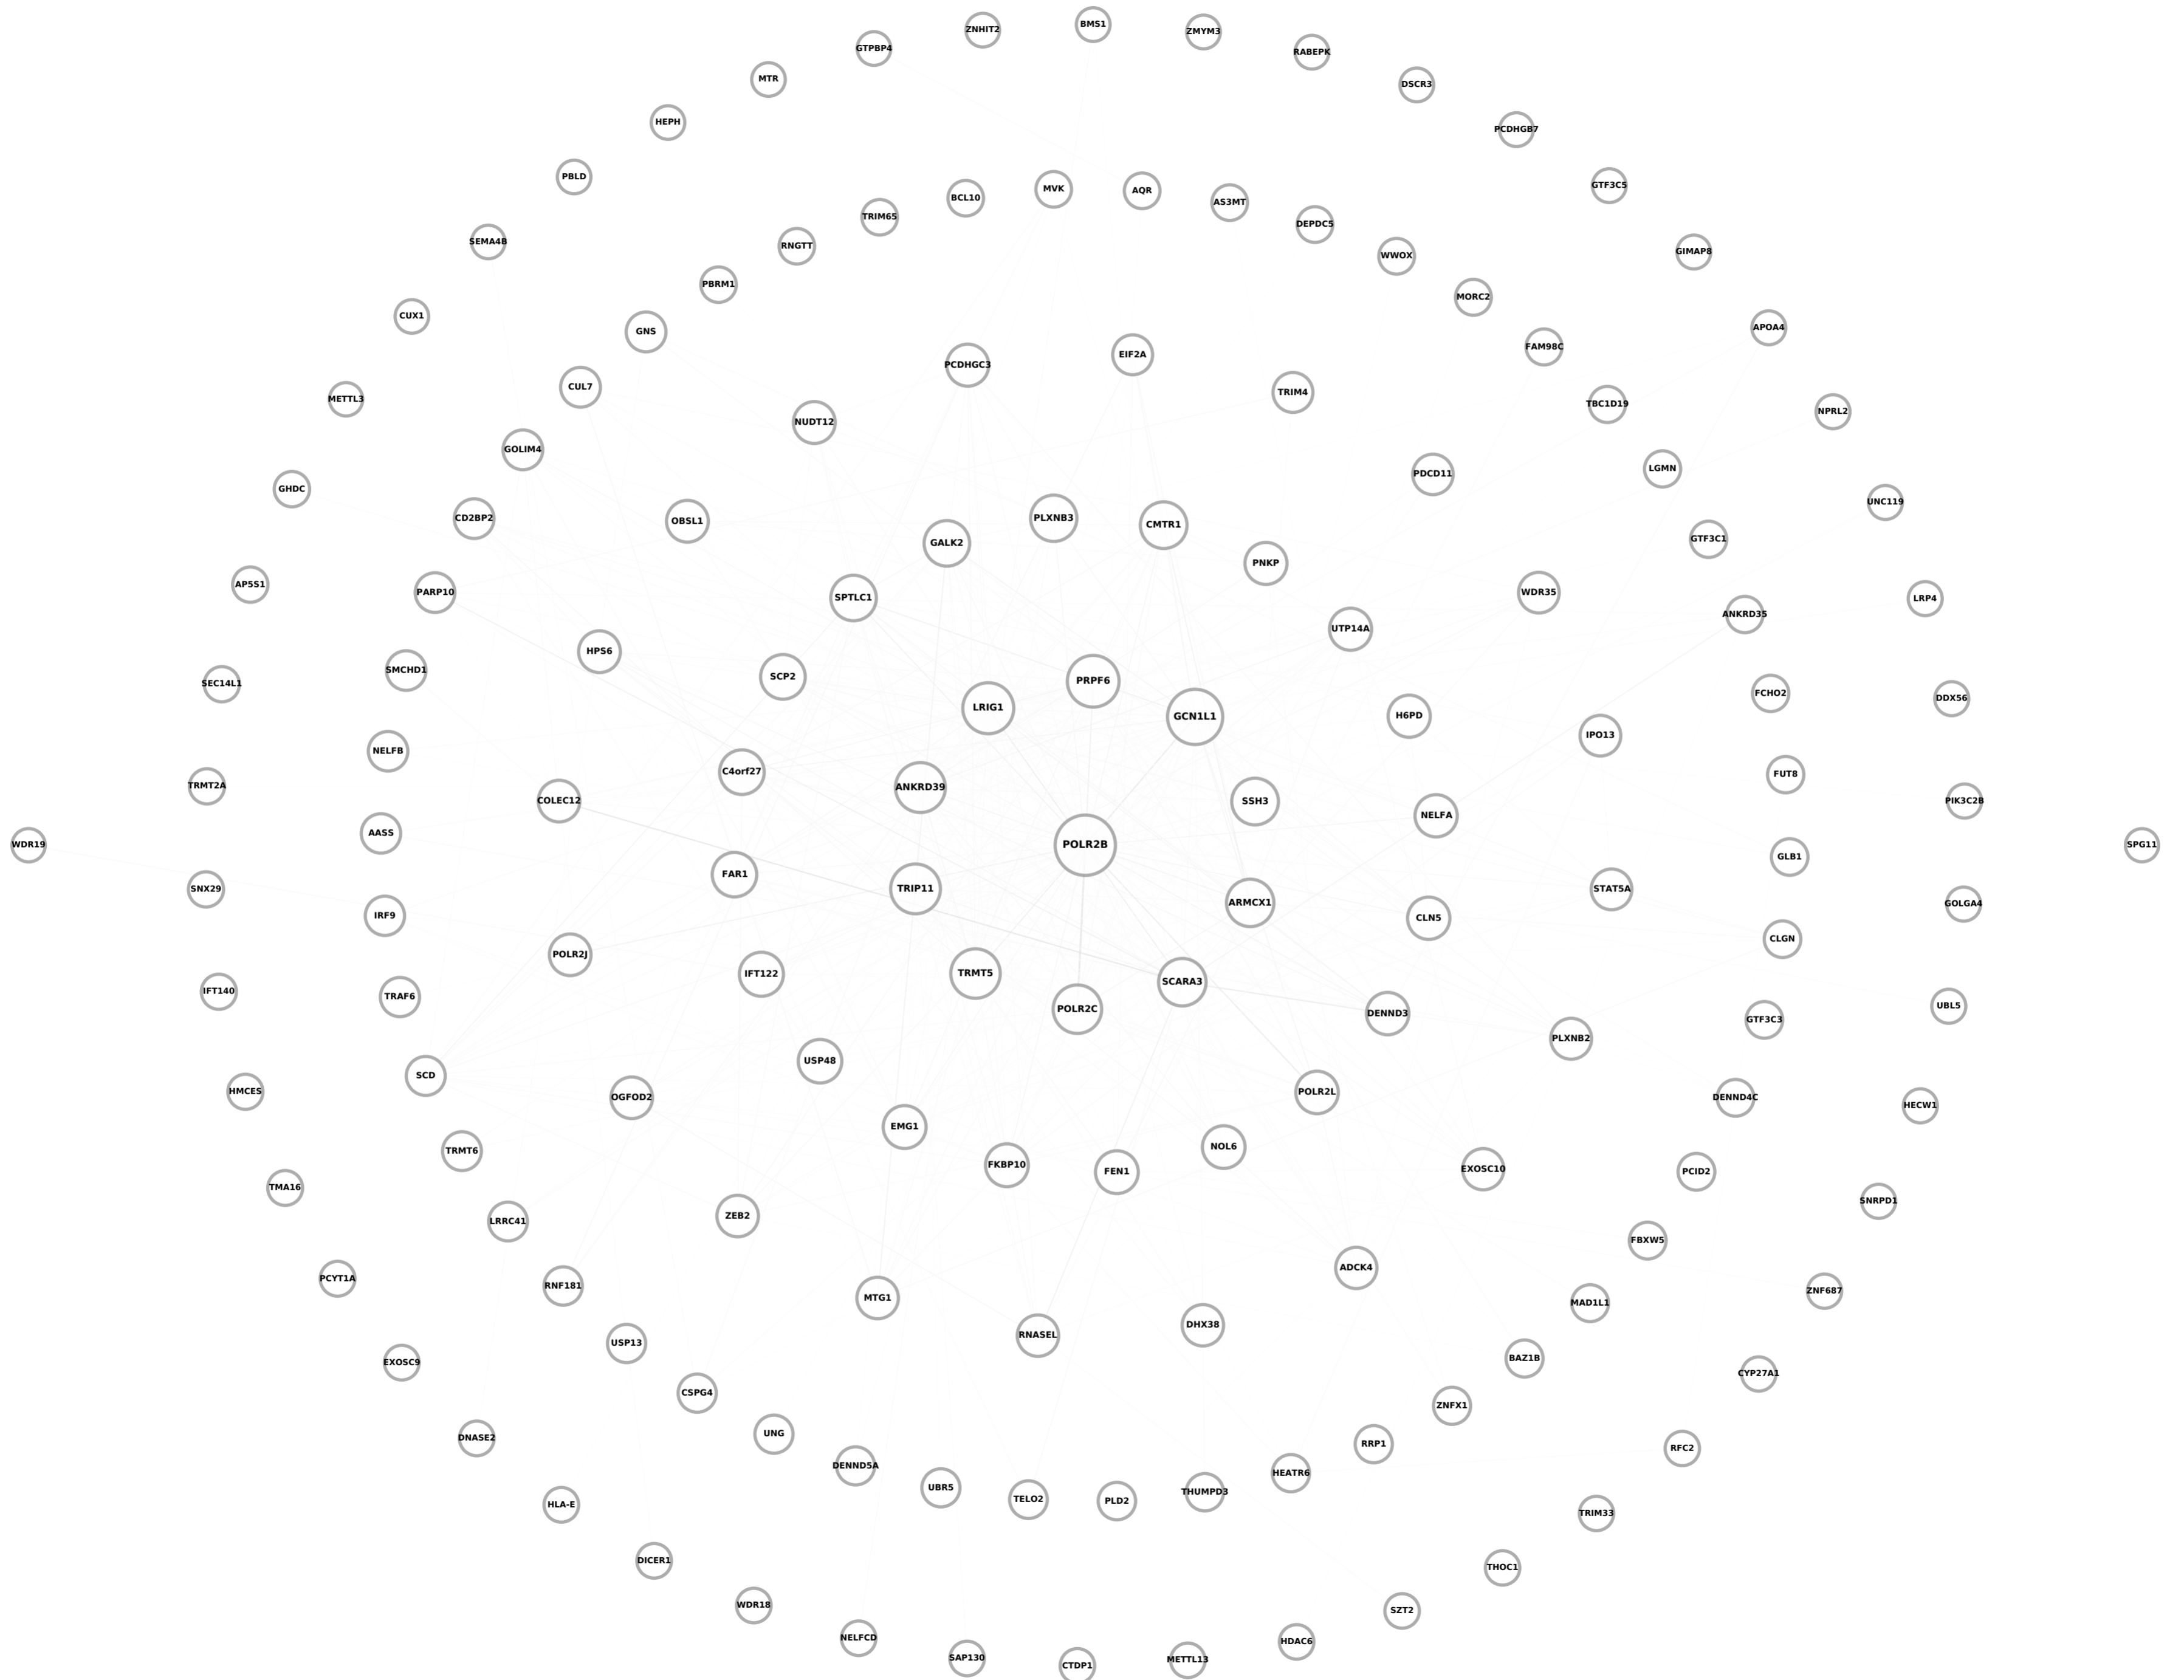



Module 18, n = 148,  
FDR Corrected pvalue 0.074783

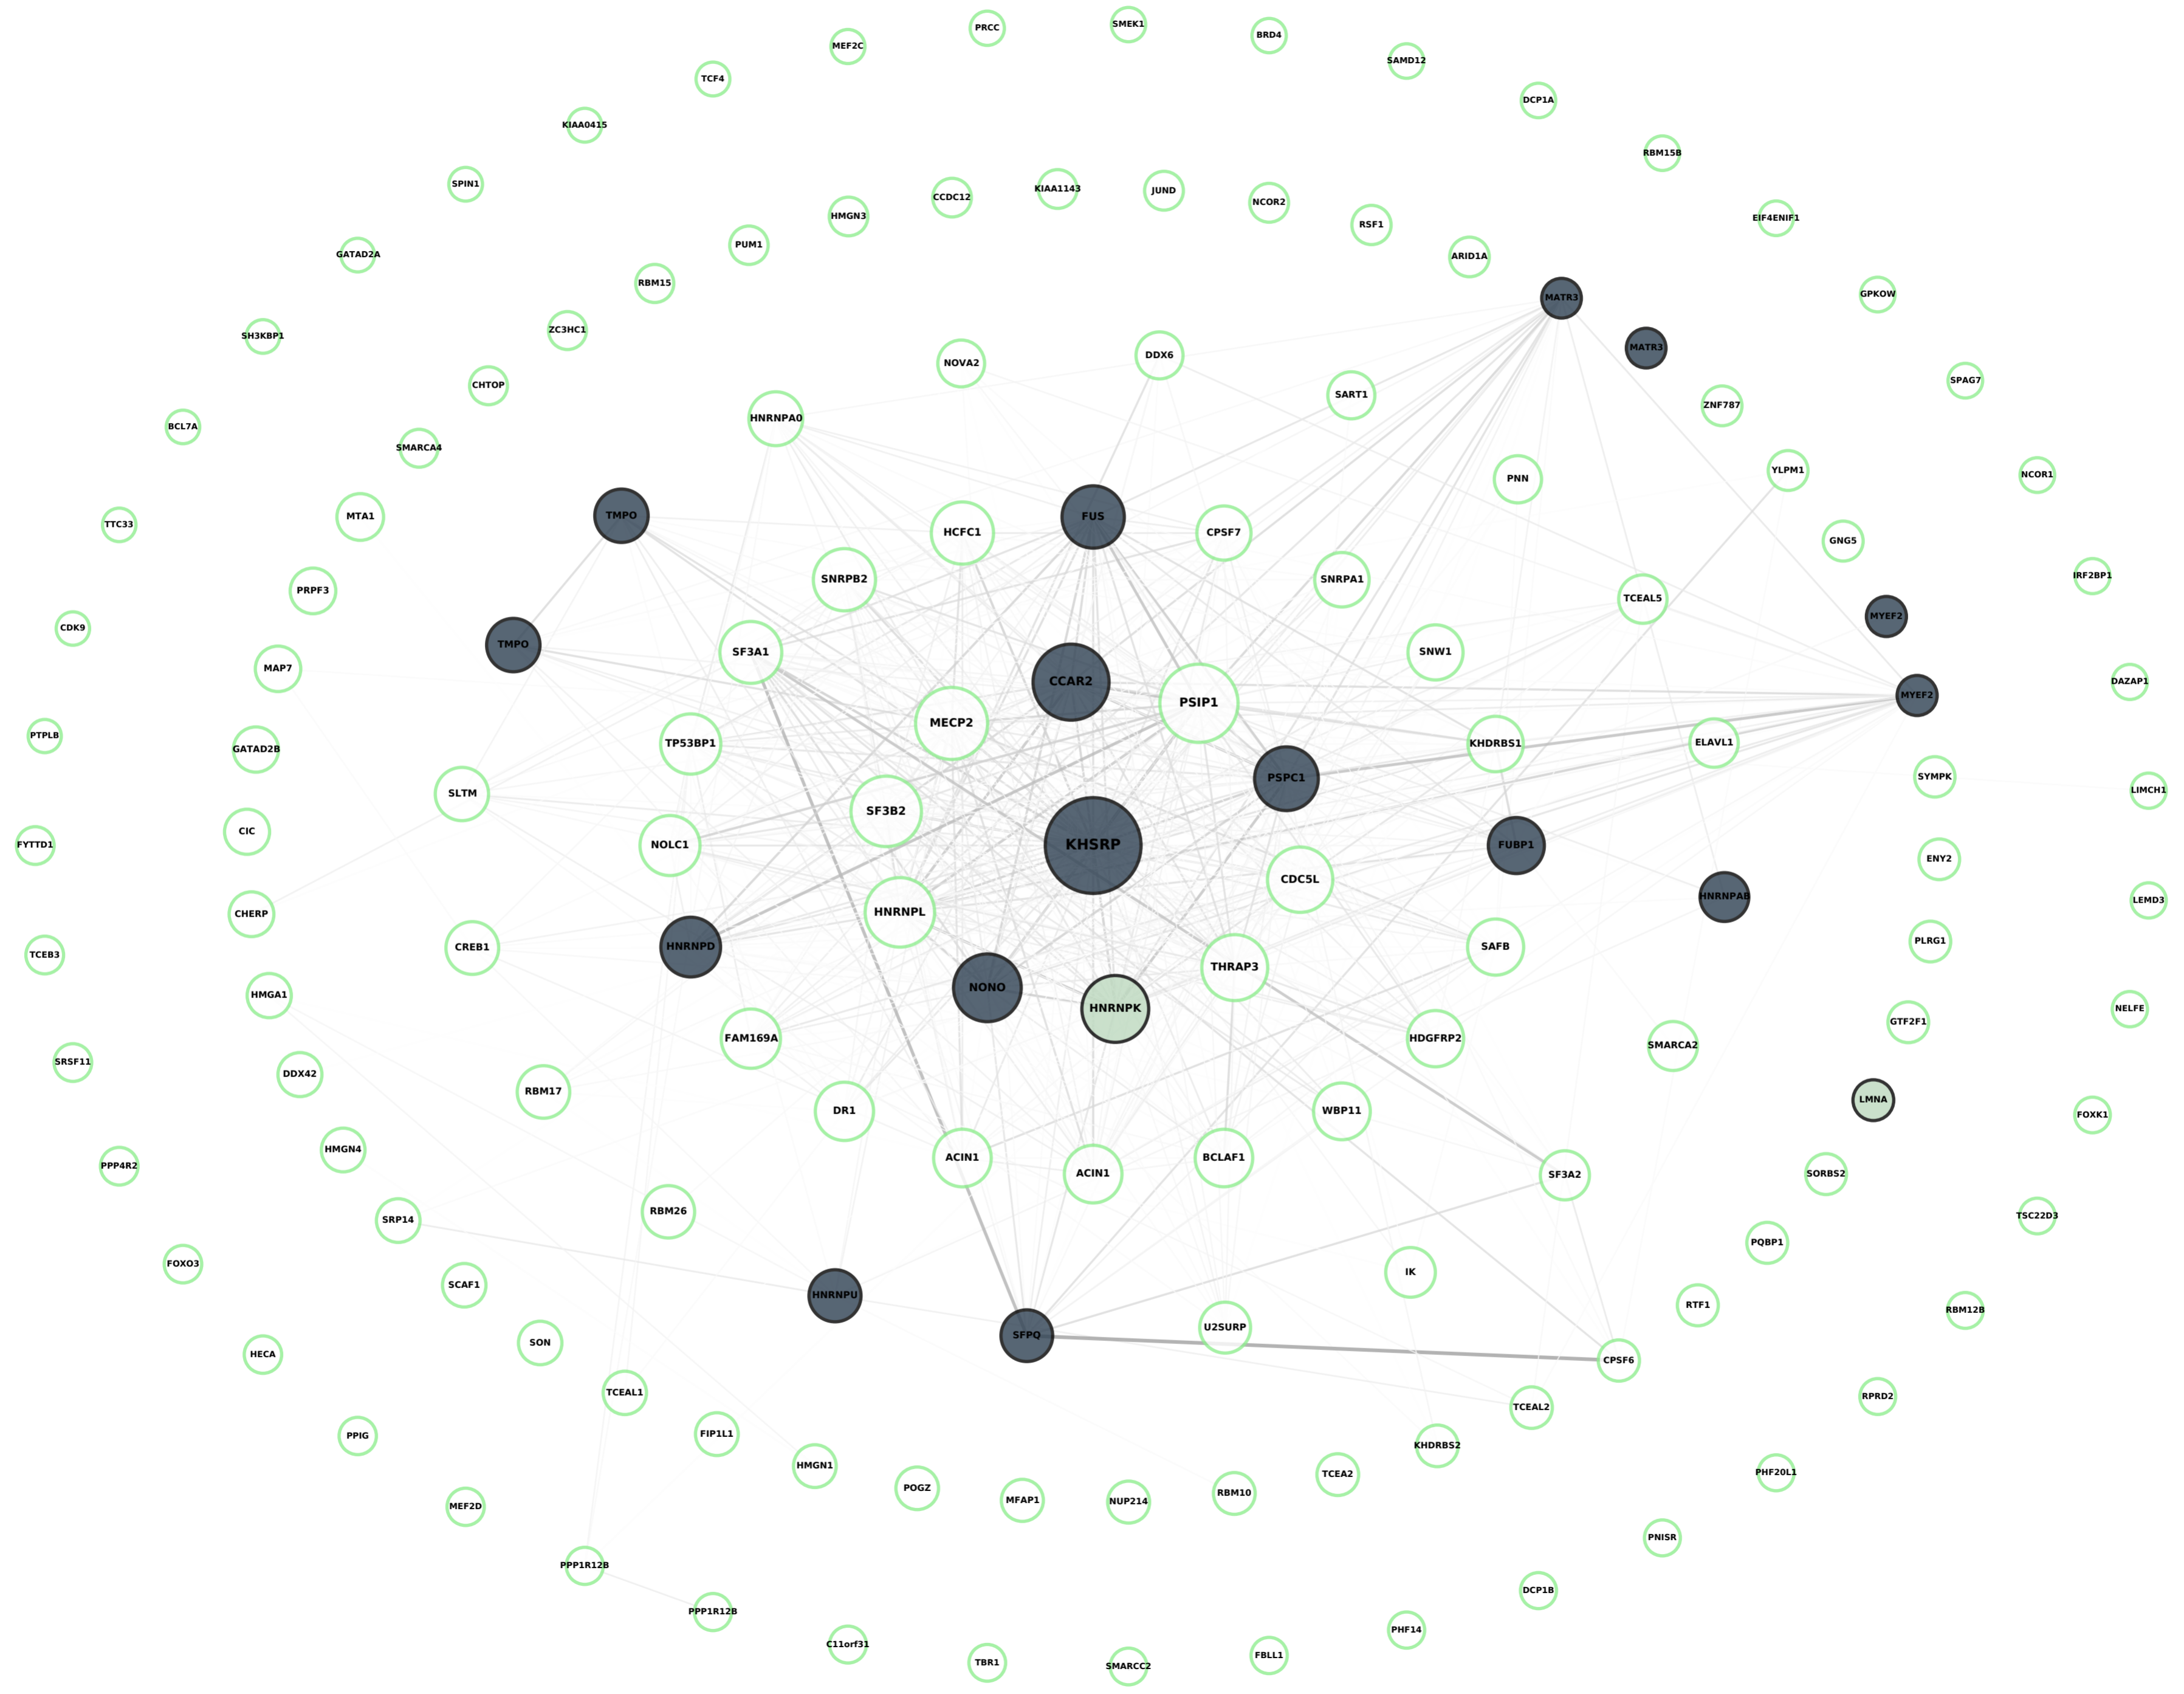

# Module 19, n = 142, FDR Corrected pvalue 1

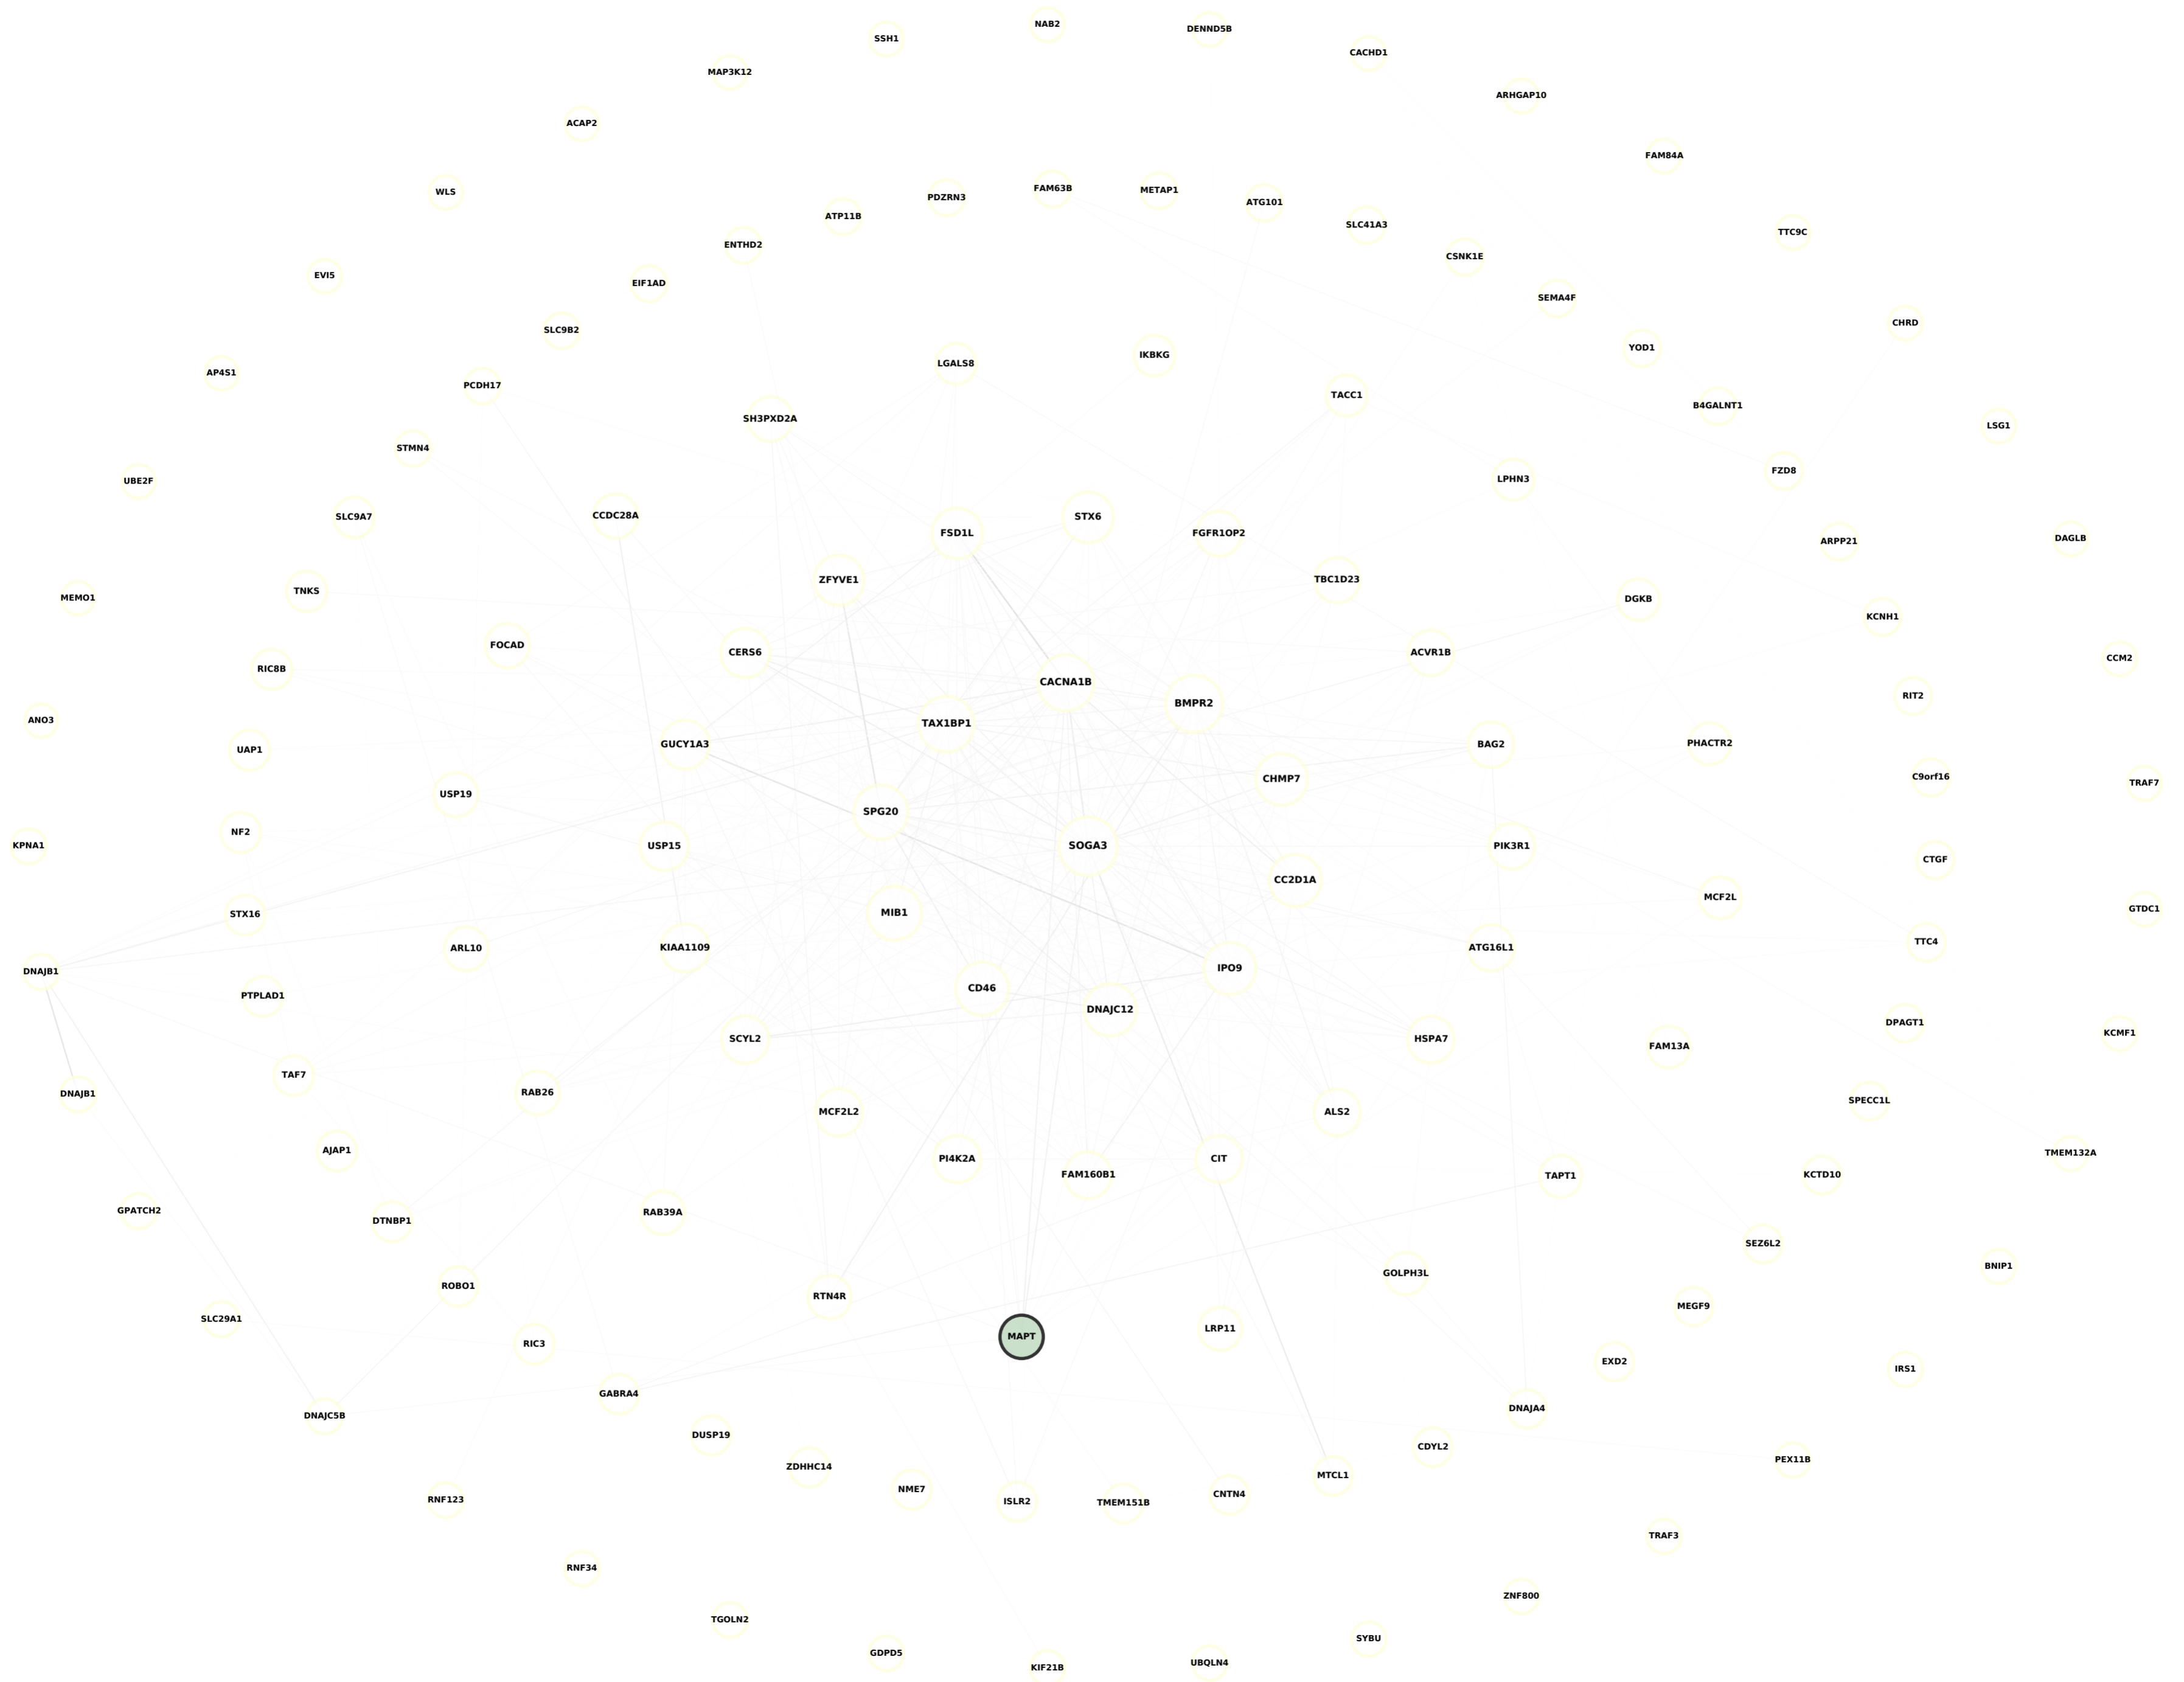





Module 21, n = 126,  
FDR Corrected pvalue 1

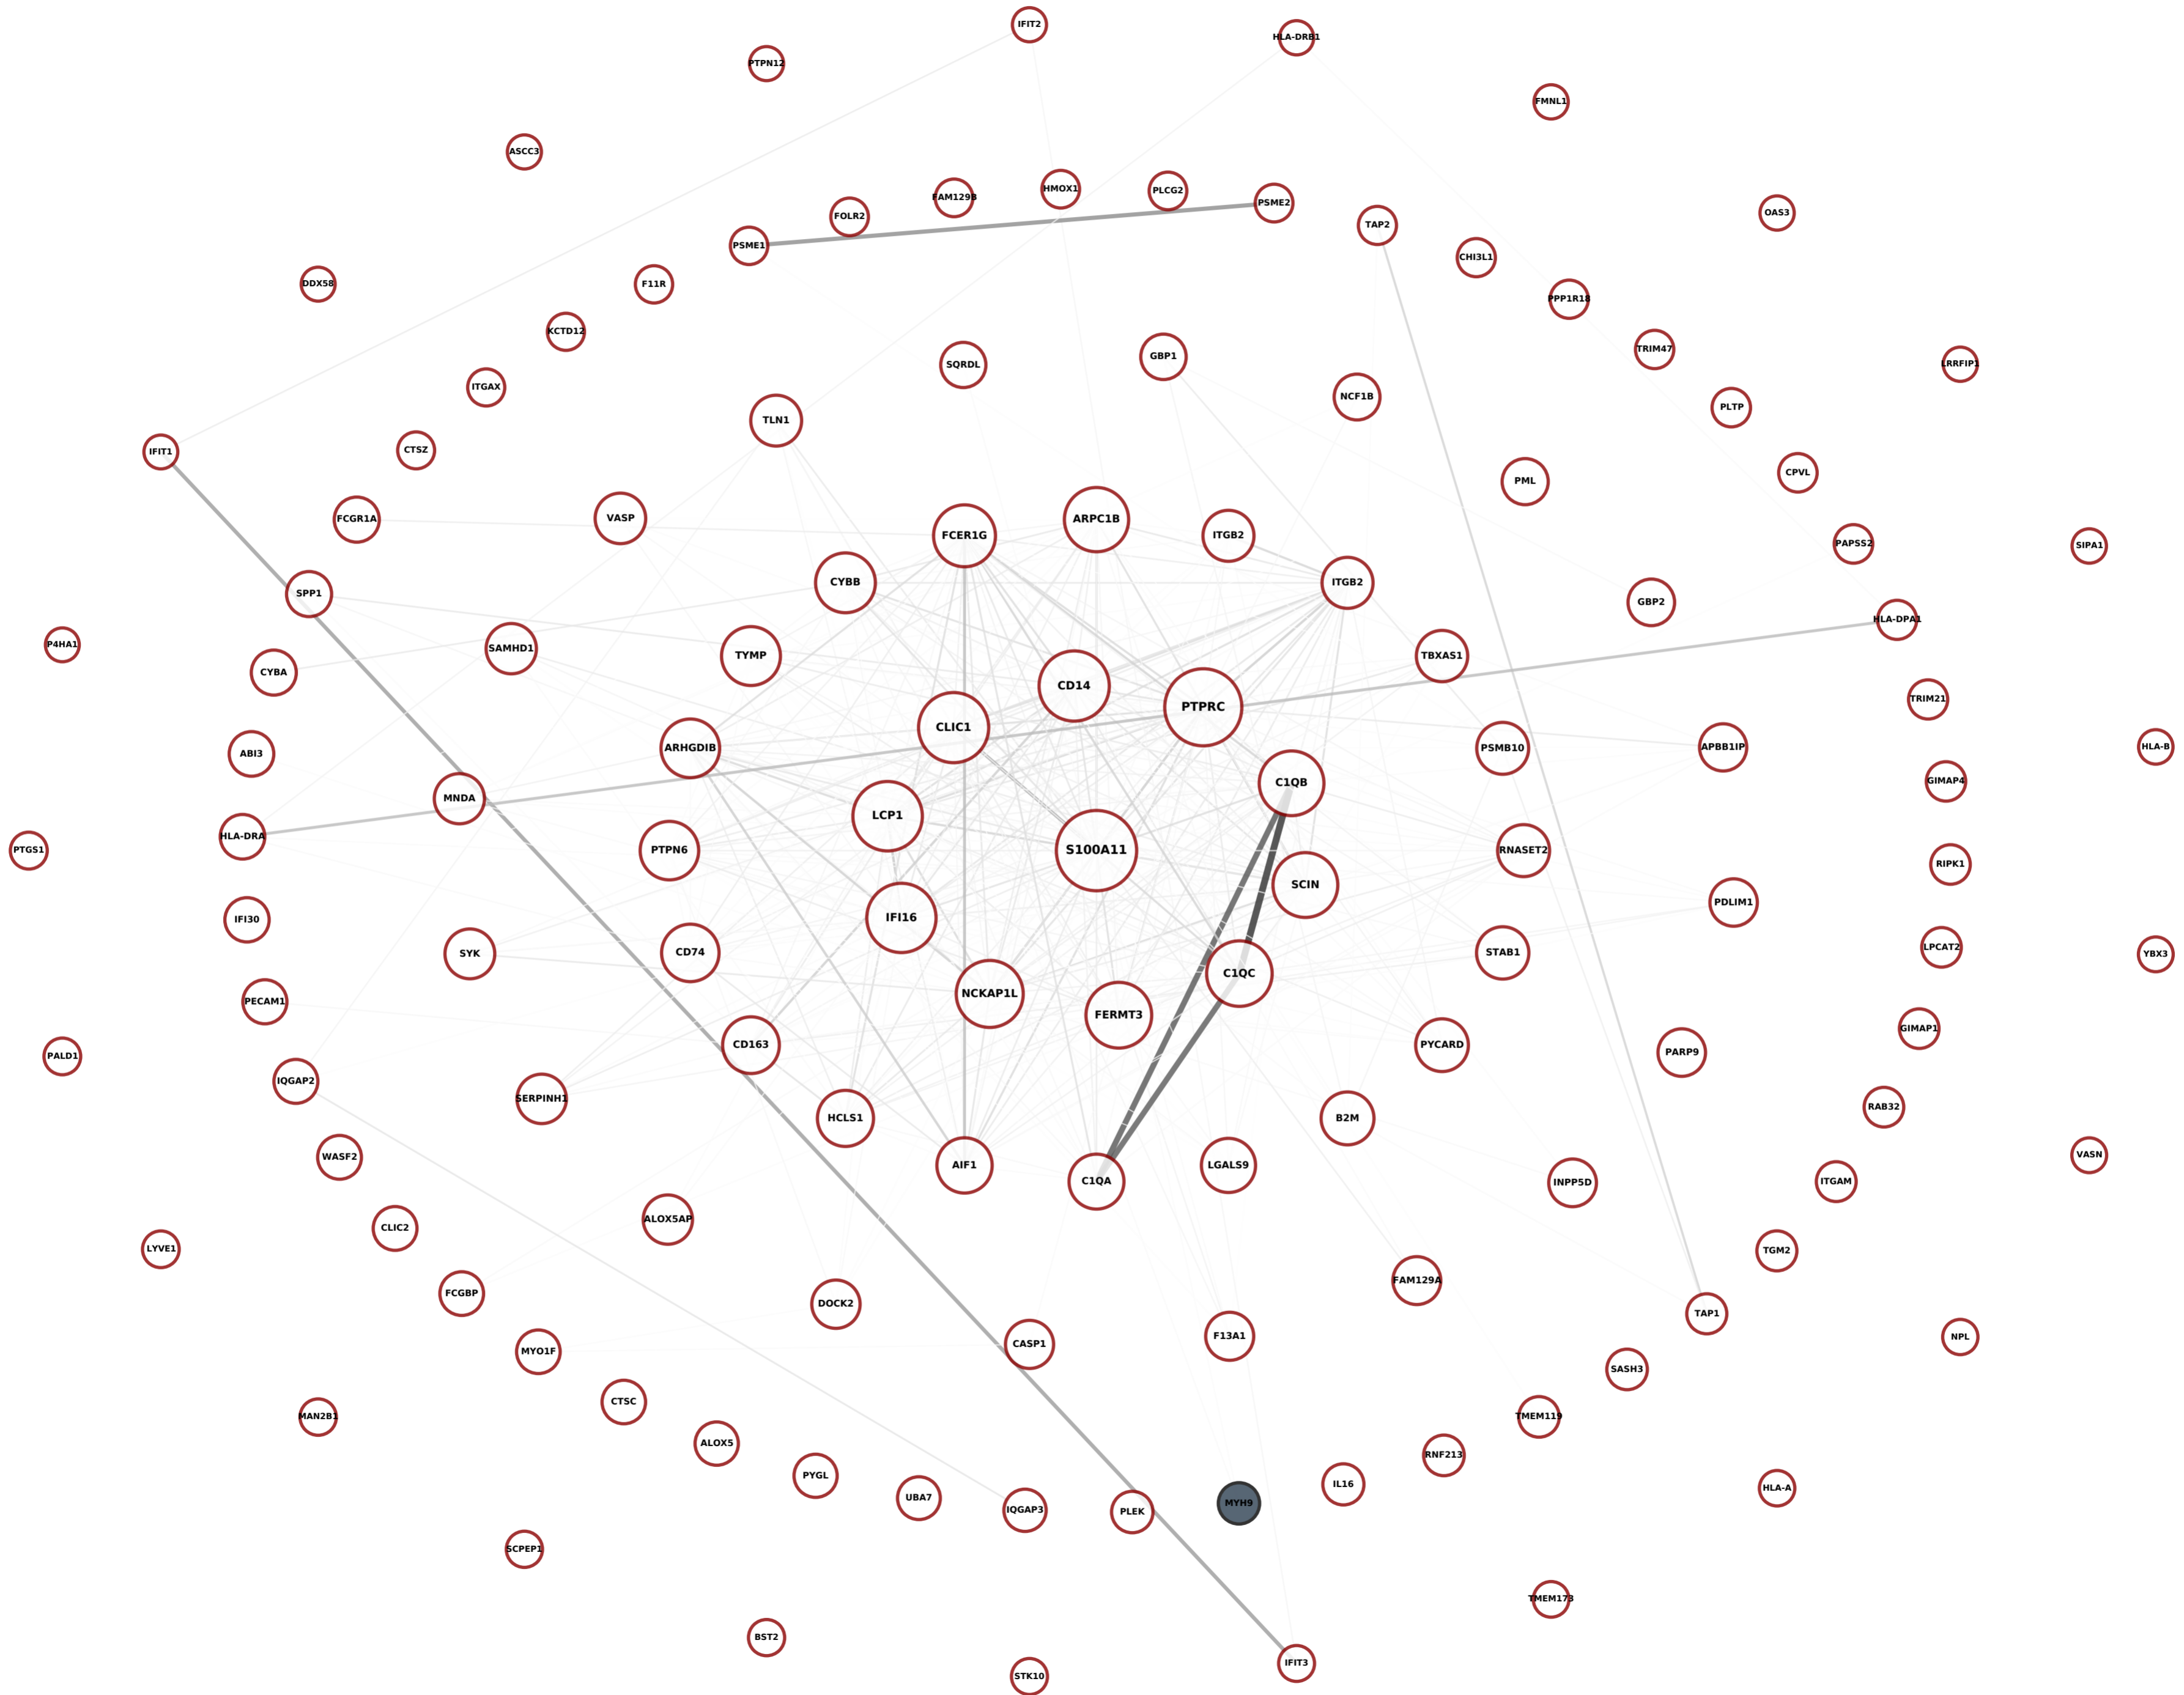



Module 22, n = 118,  
FDR Corrected pvalue 1

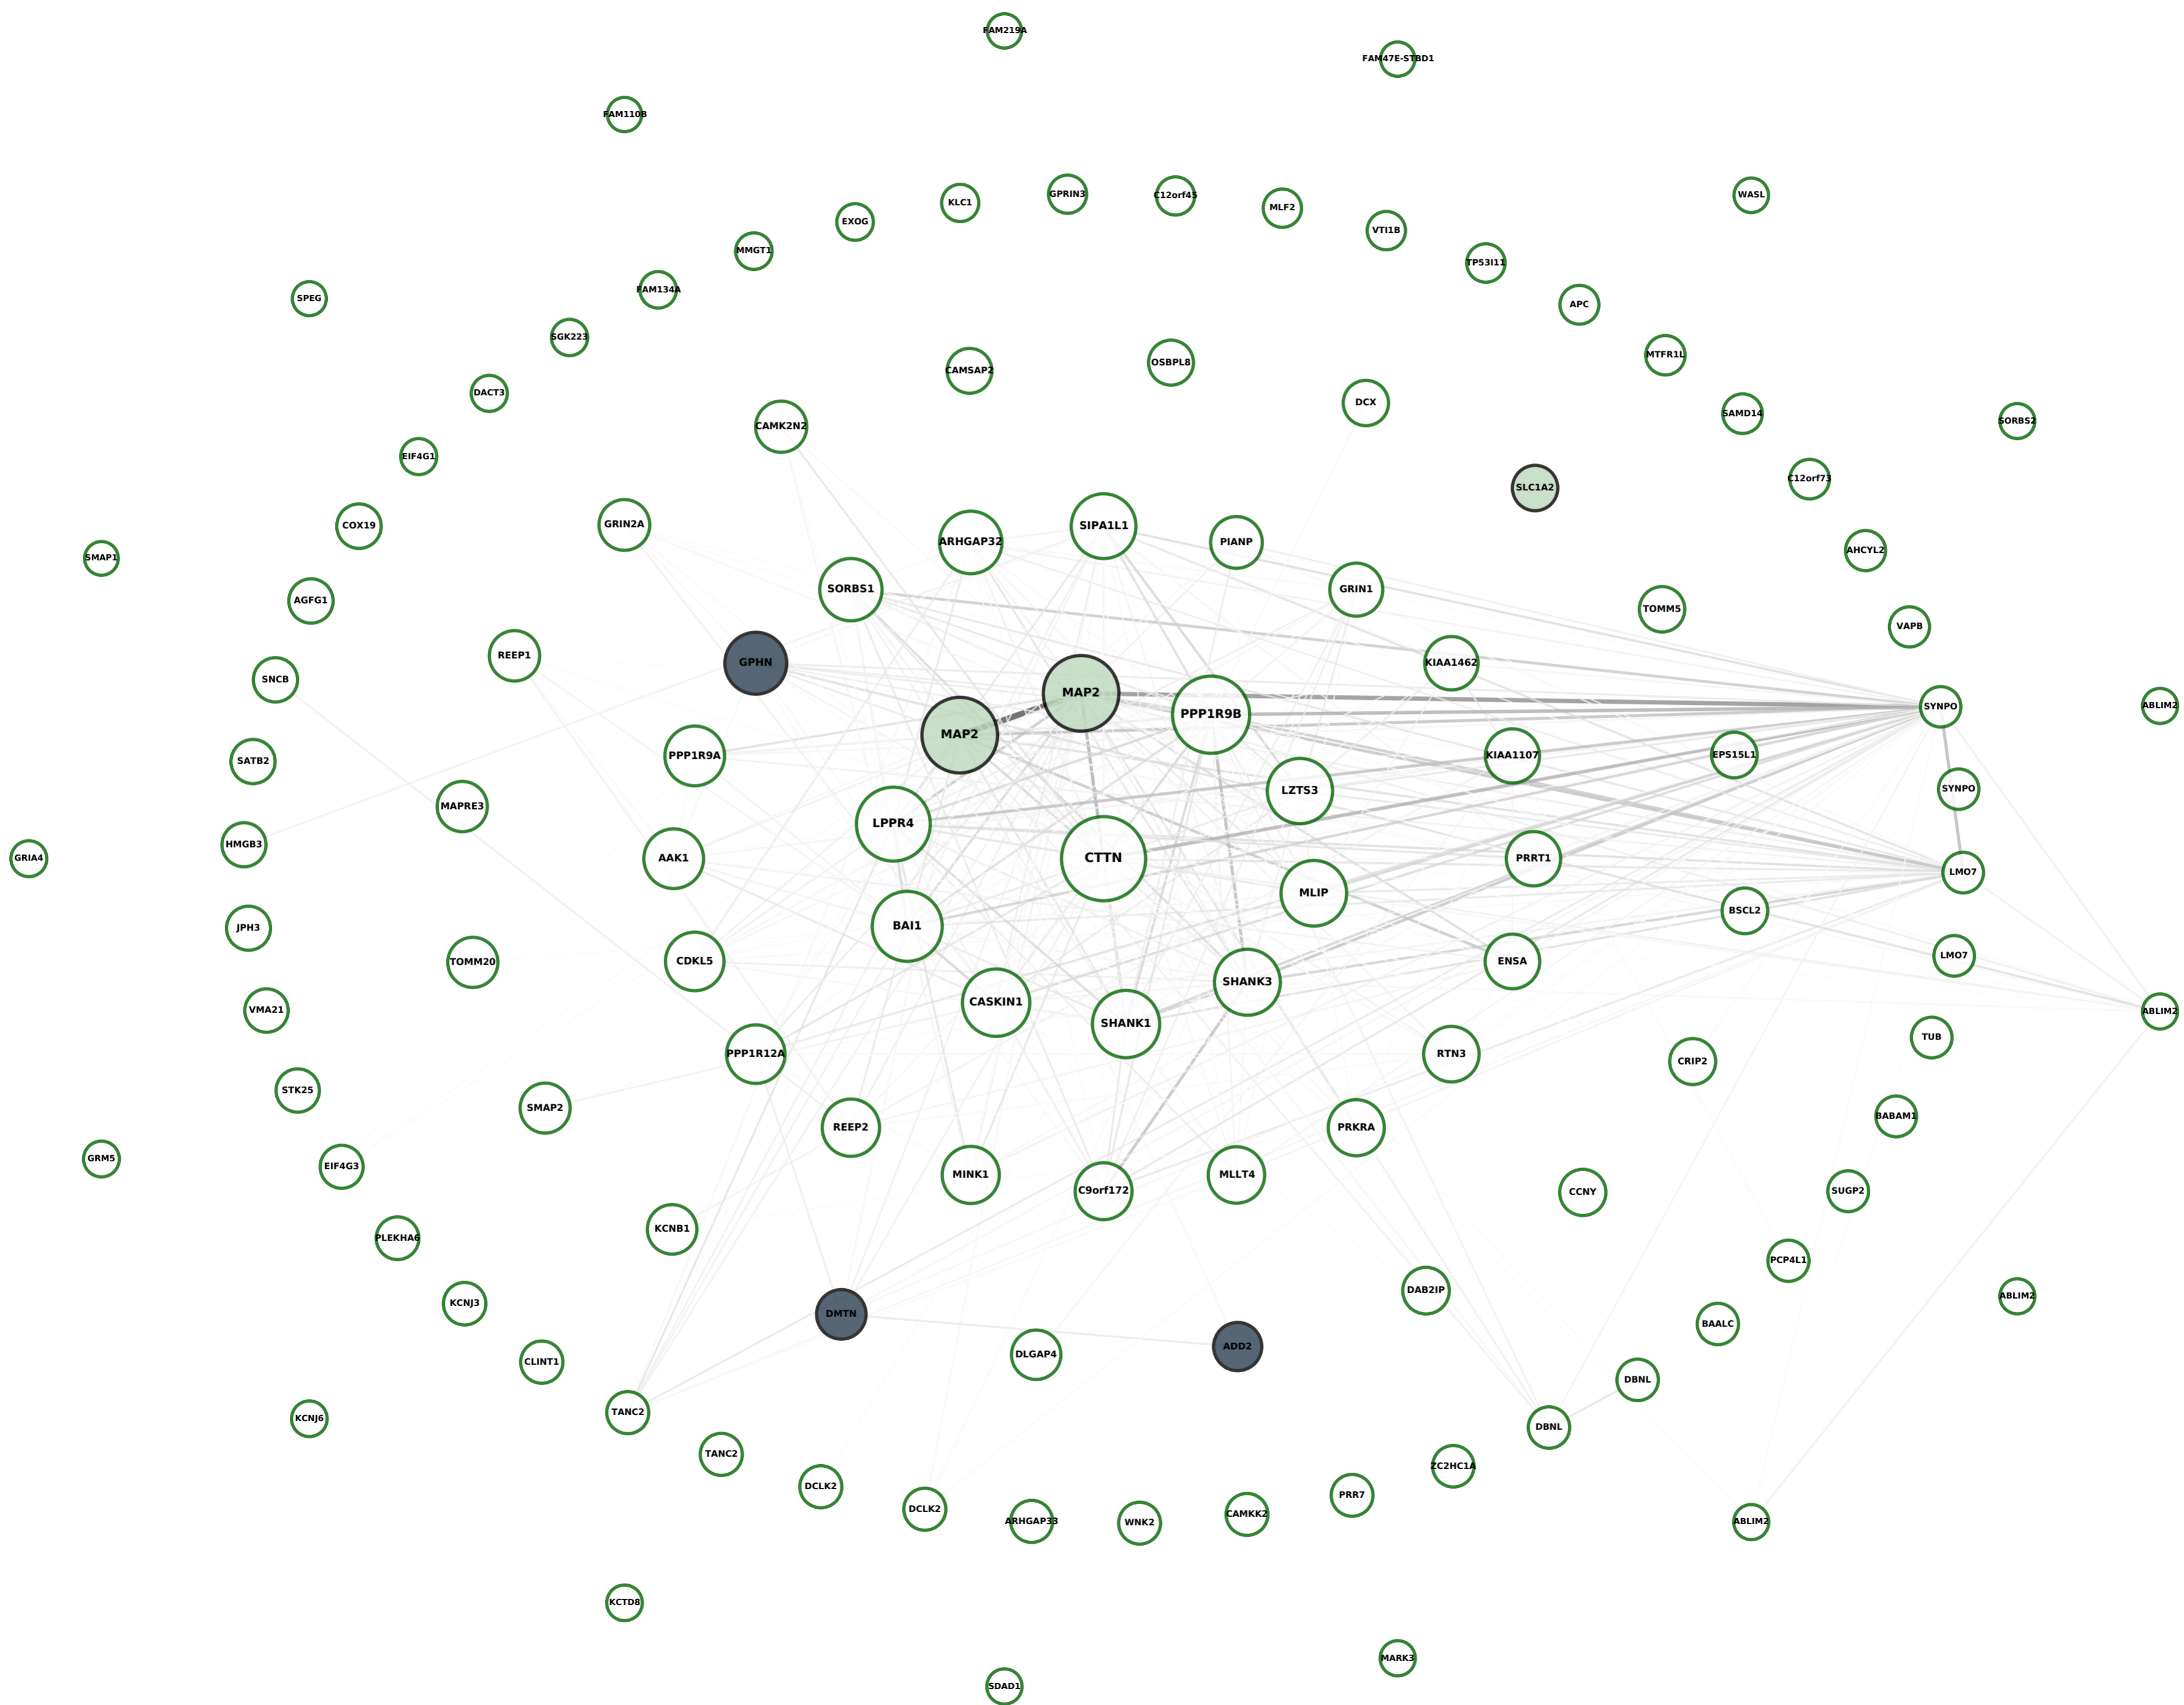

Module 23, n = 111,  
FDR Corrected pvalue 1

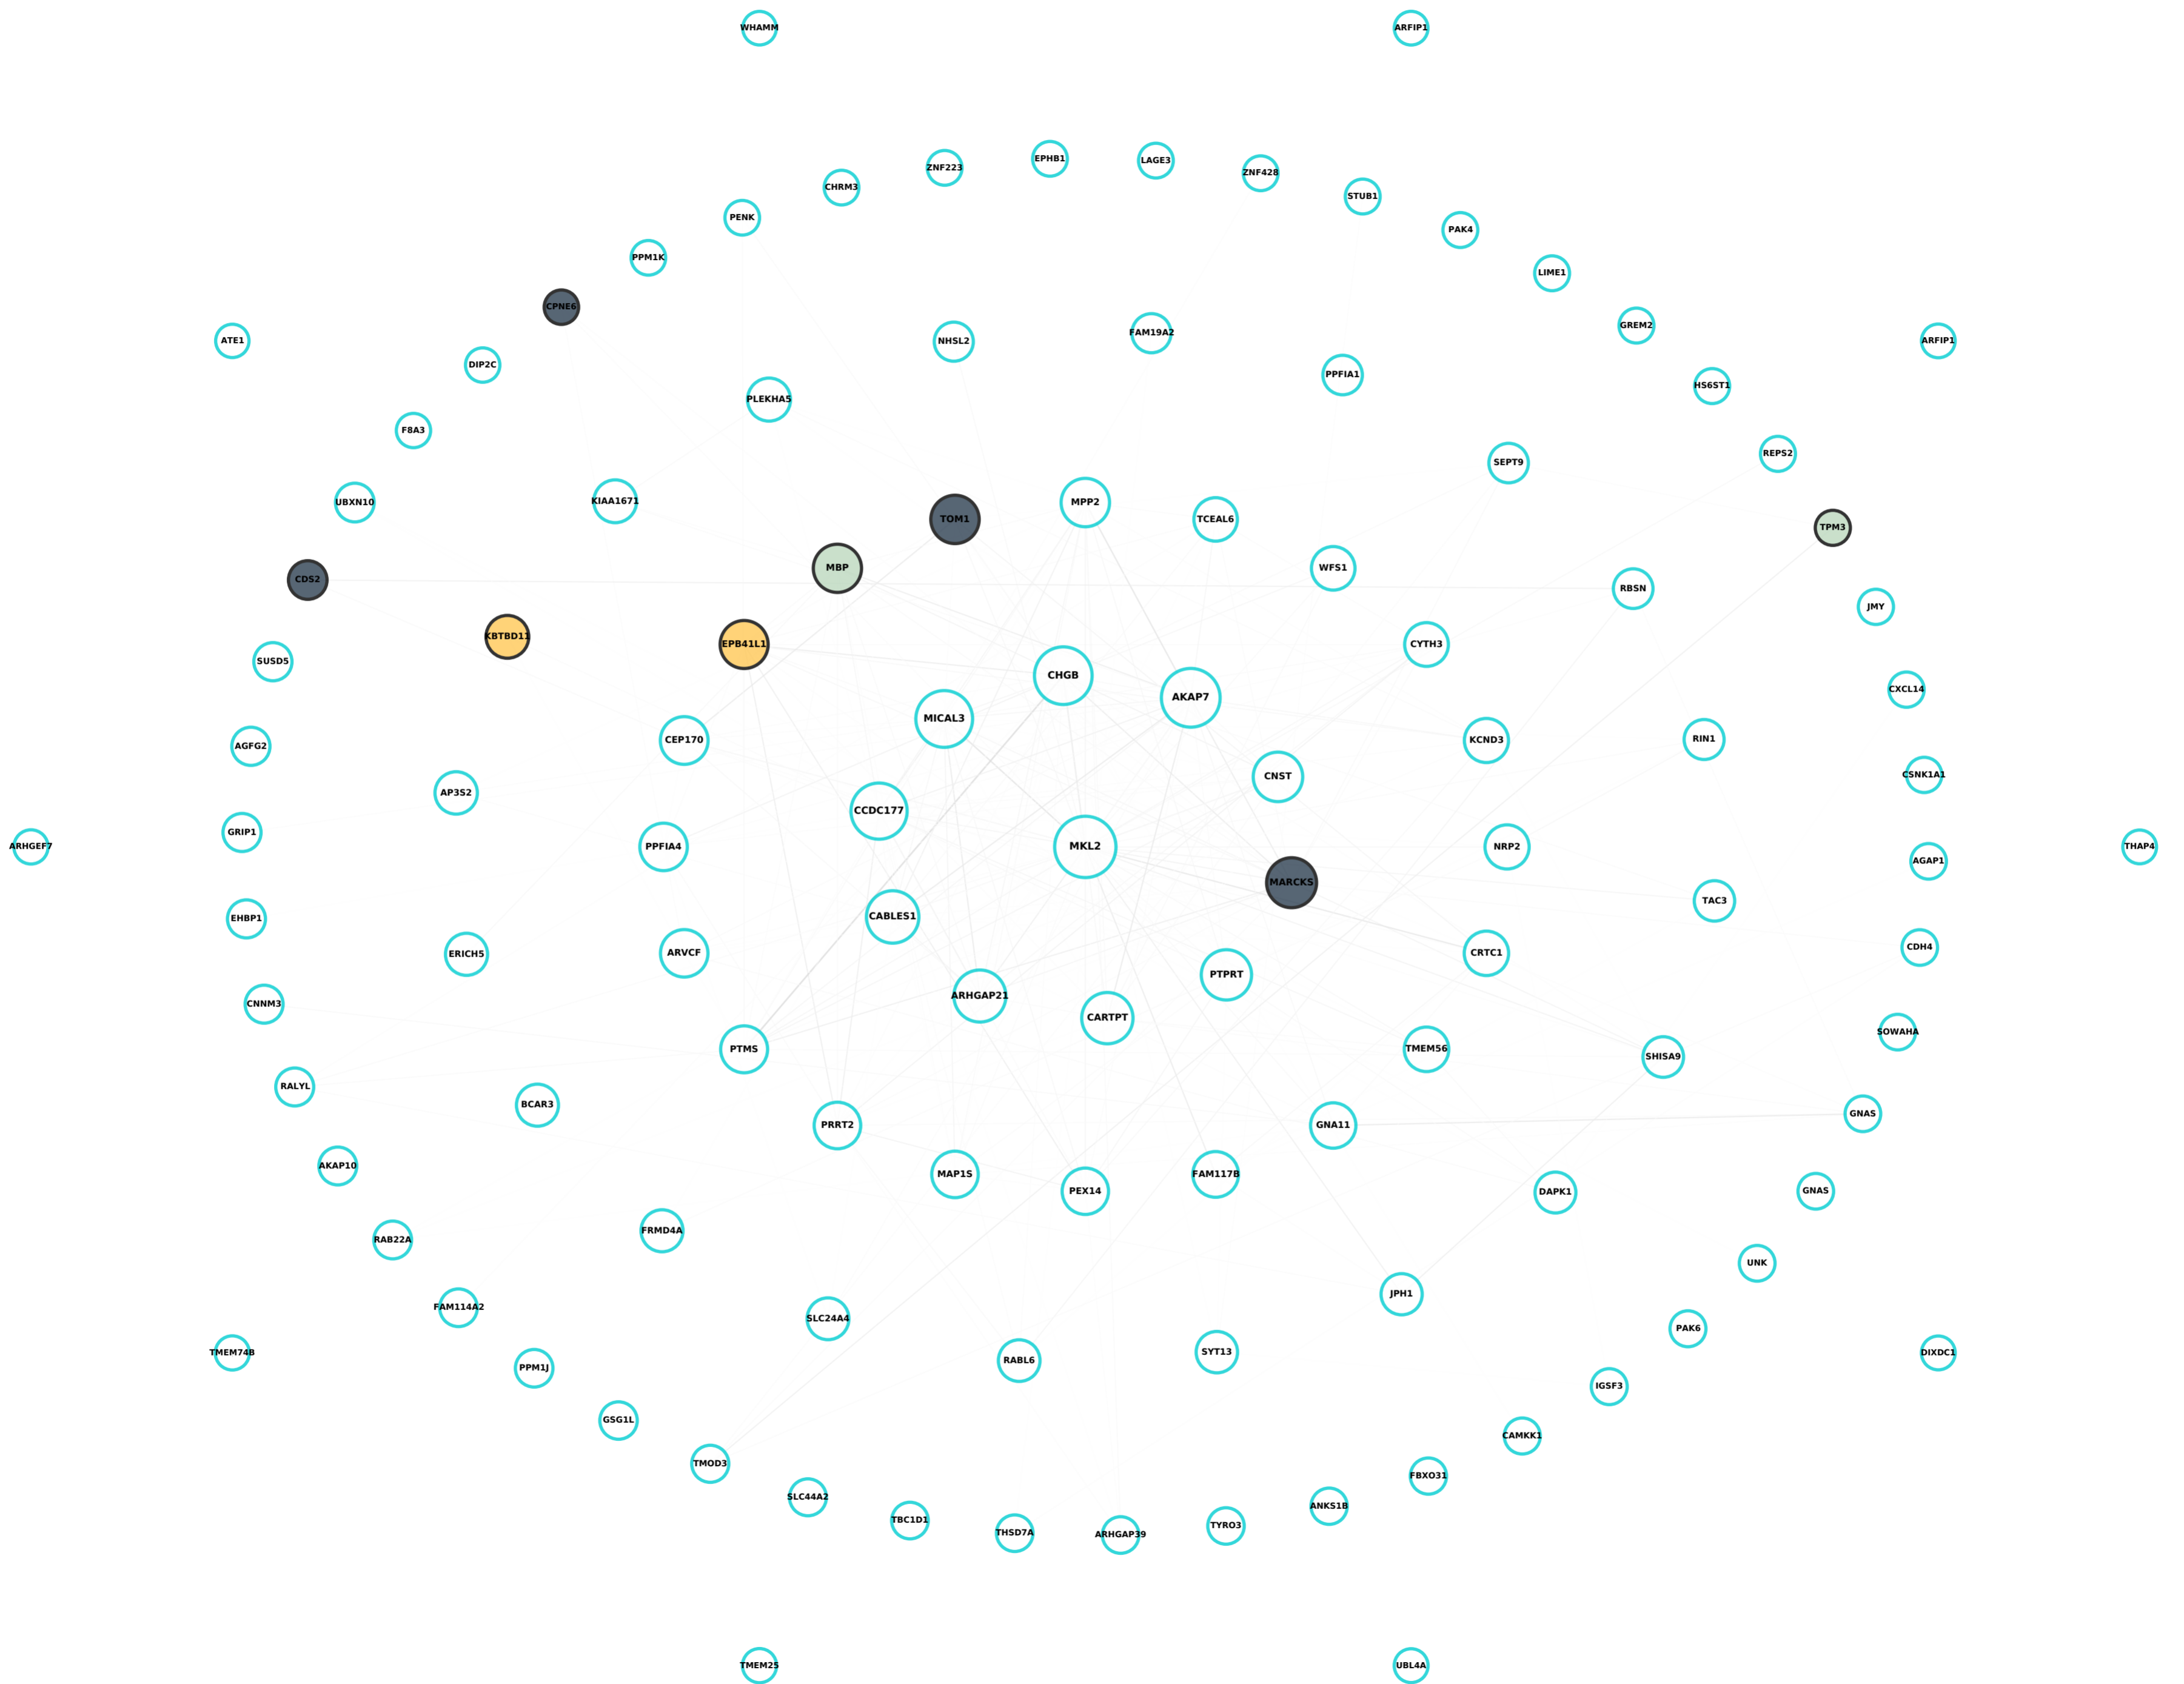

Module 24, n = 111,  
FDR Corrected pvalue 1

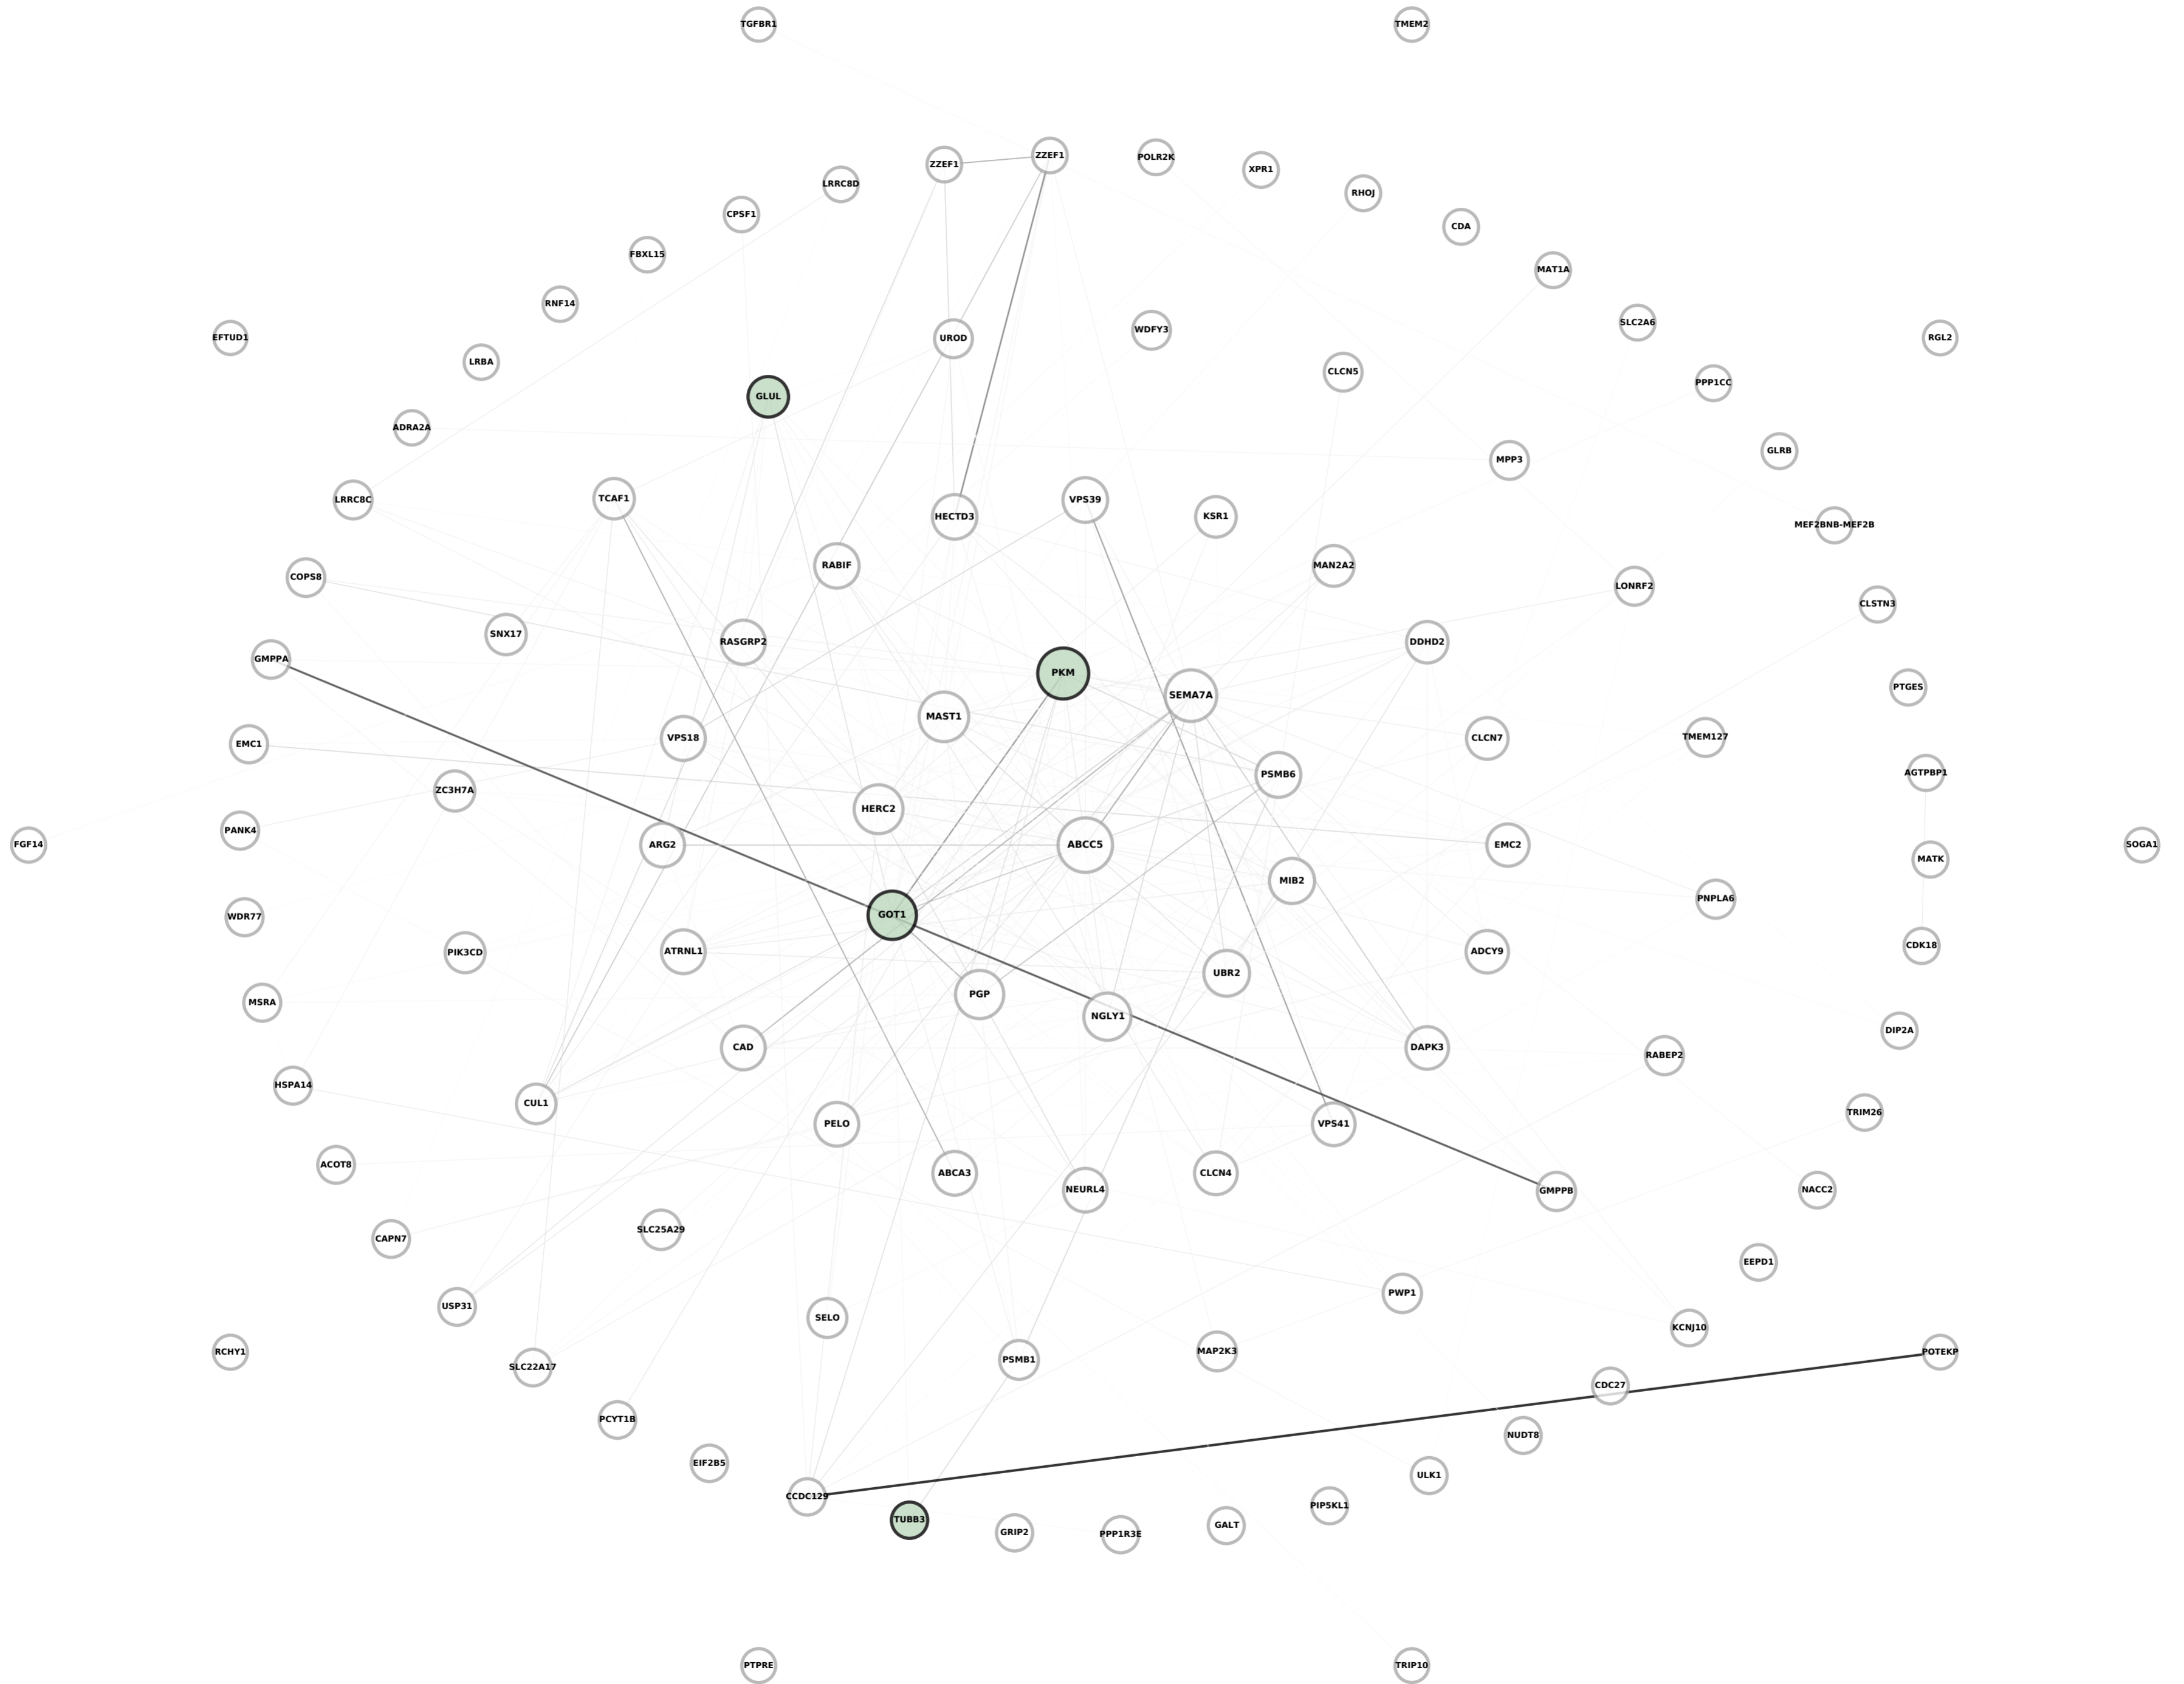



Module 25, n = 104,  
FDR Corrected pvalue 0.012325

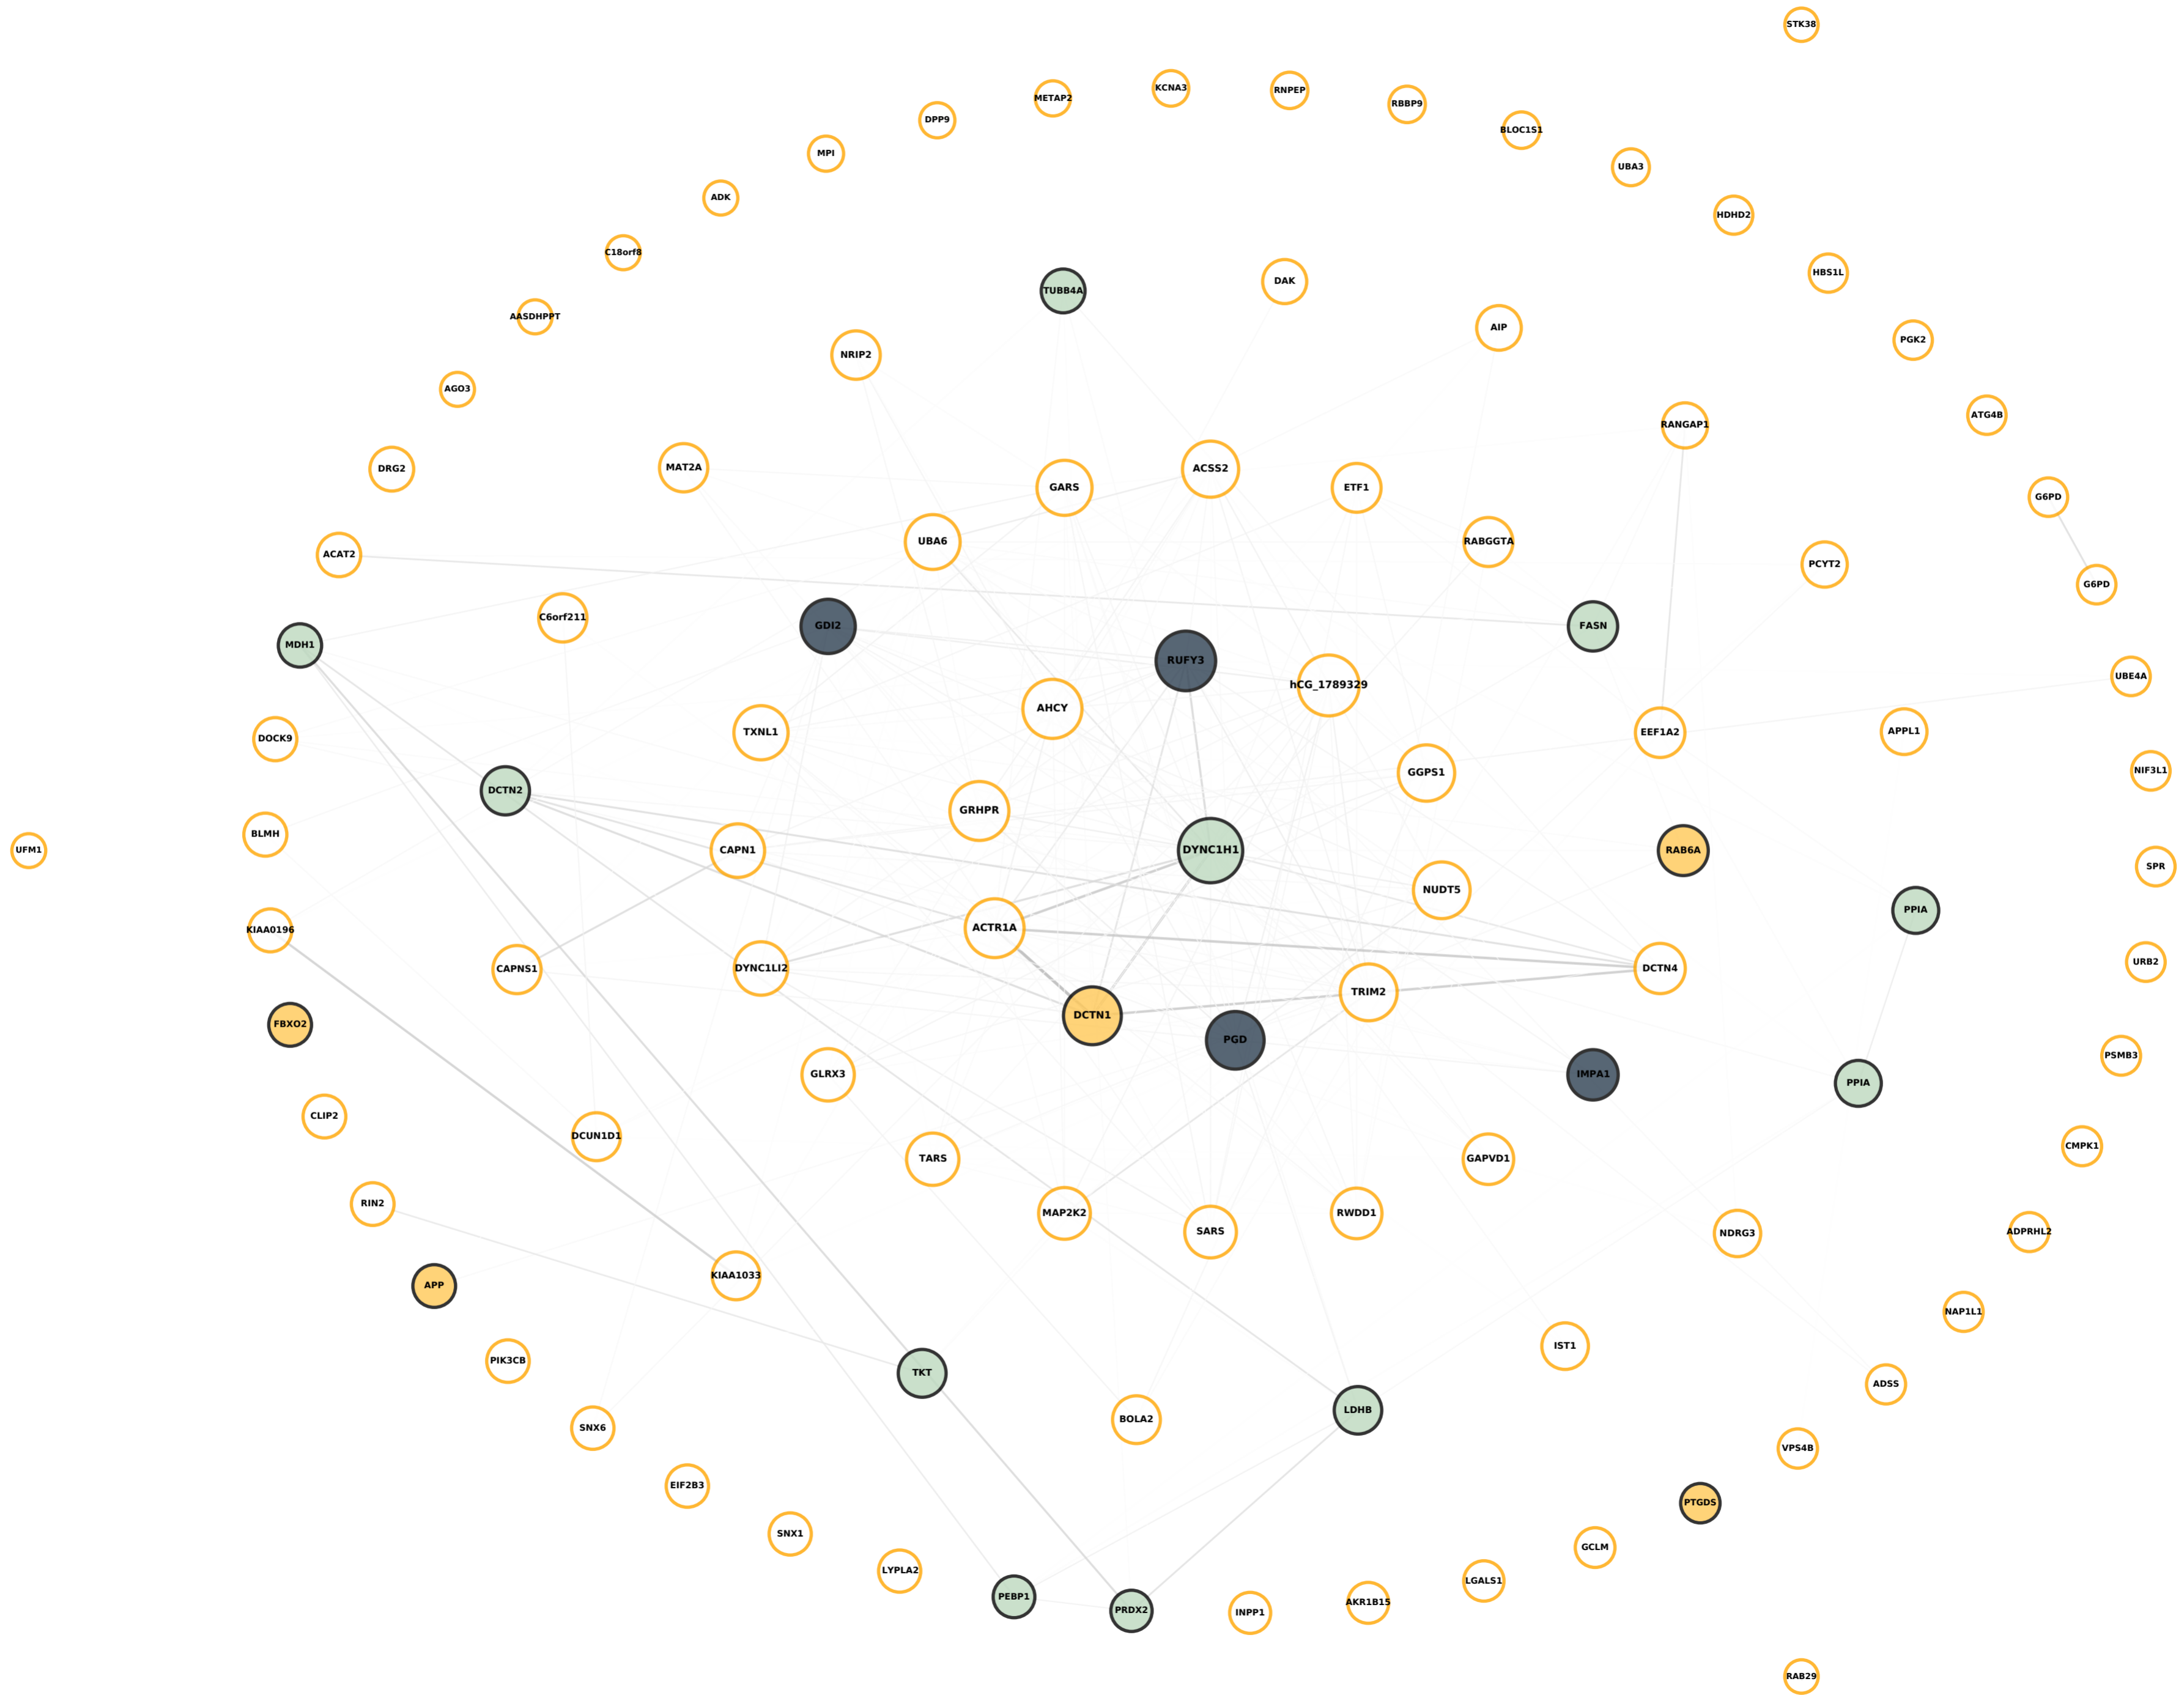

Module 26, n = 97,  
FDR Corrected pvalue 1

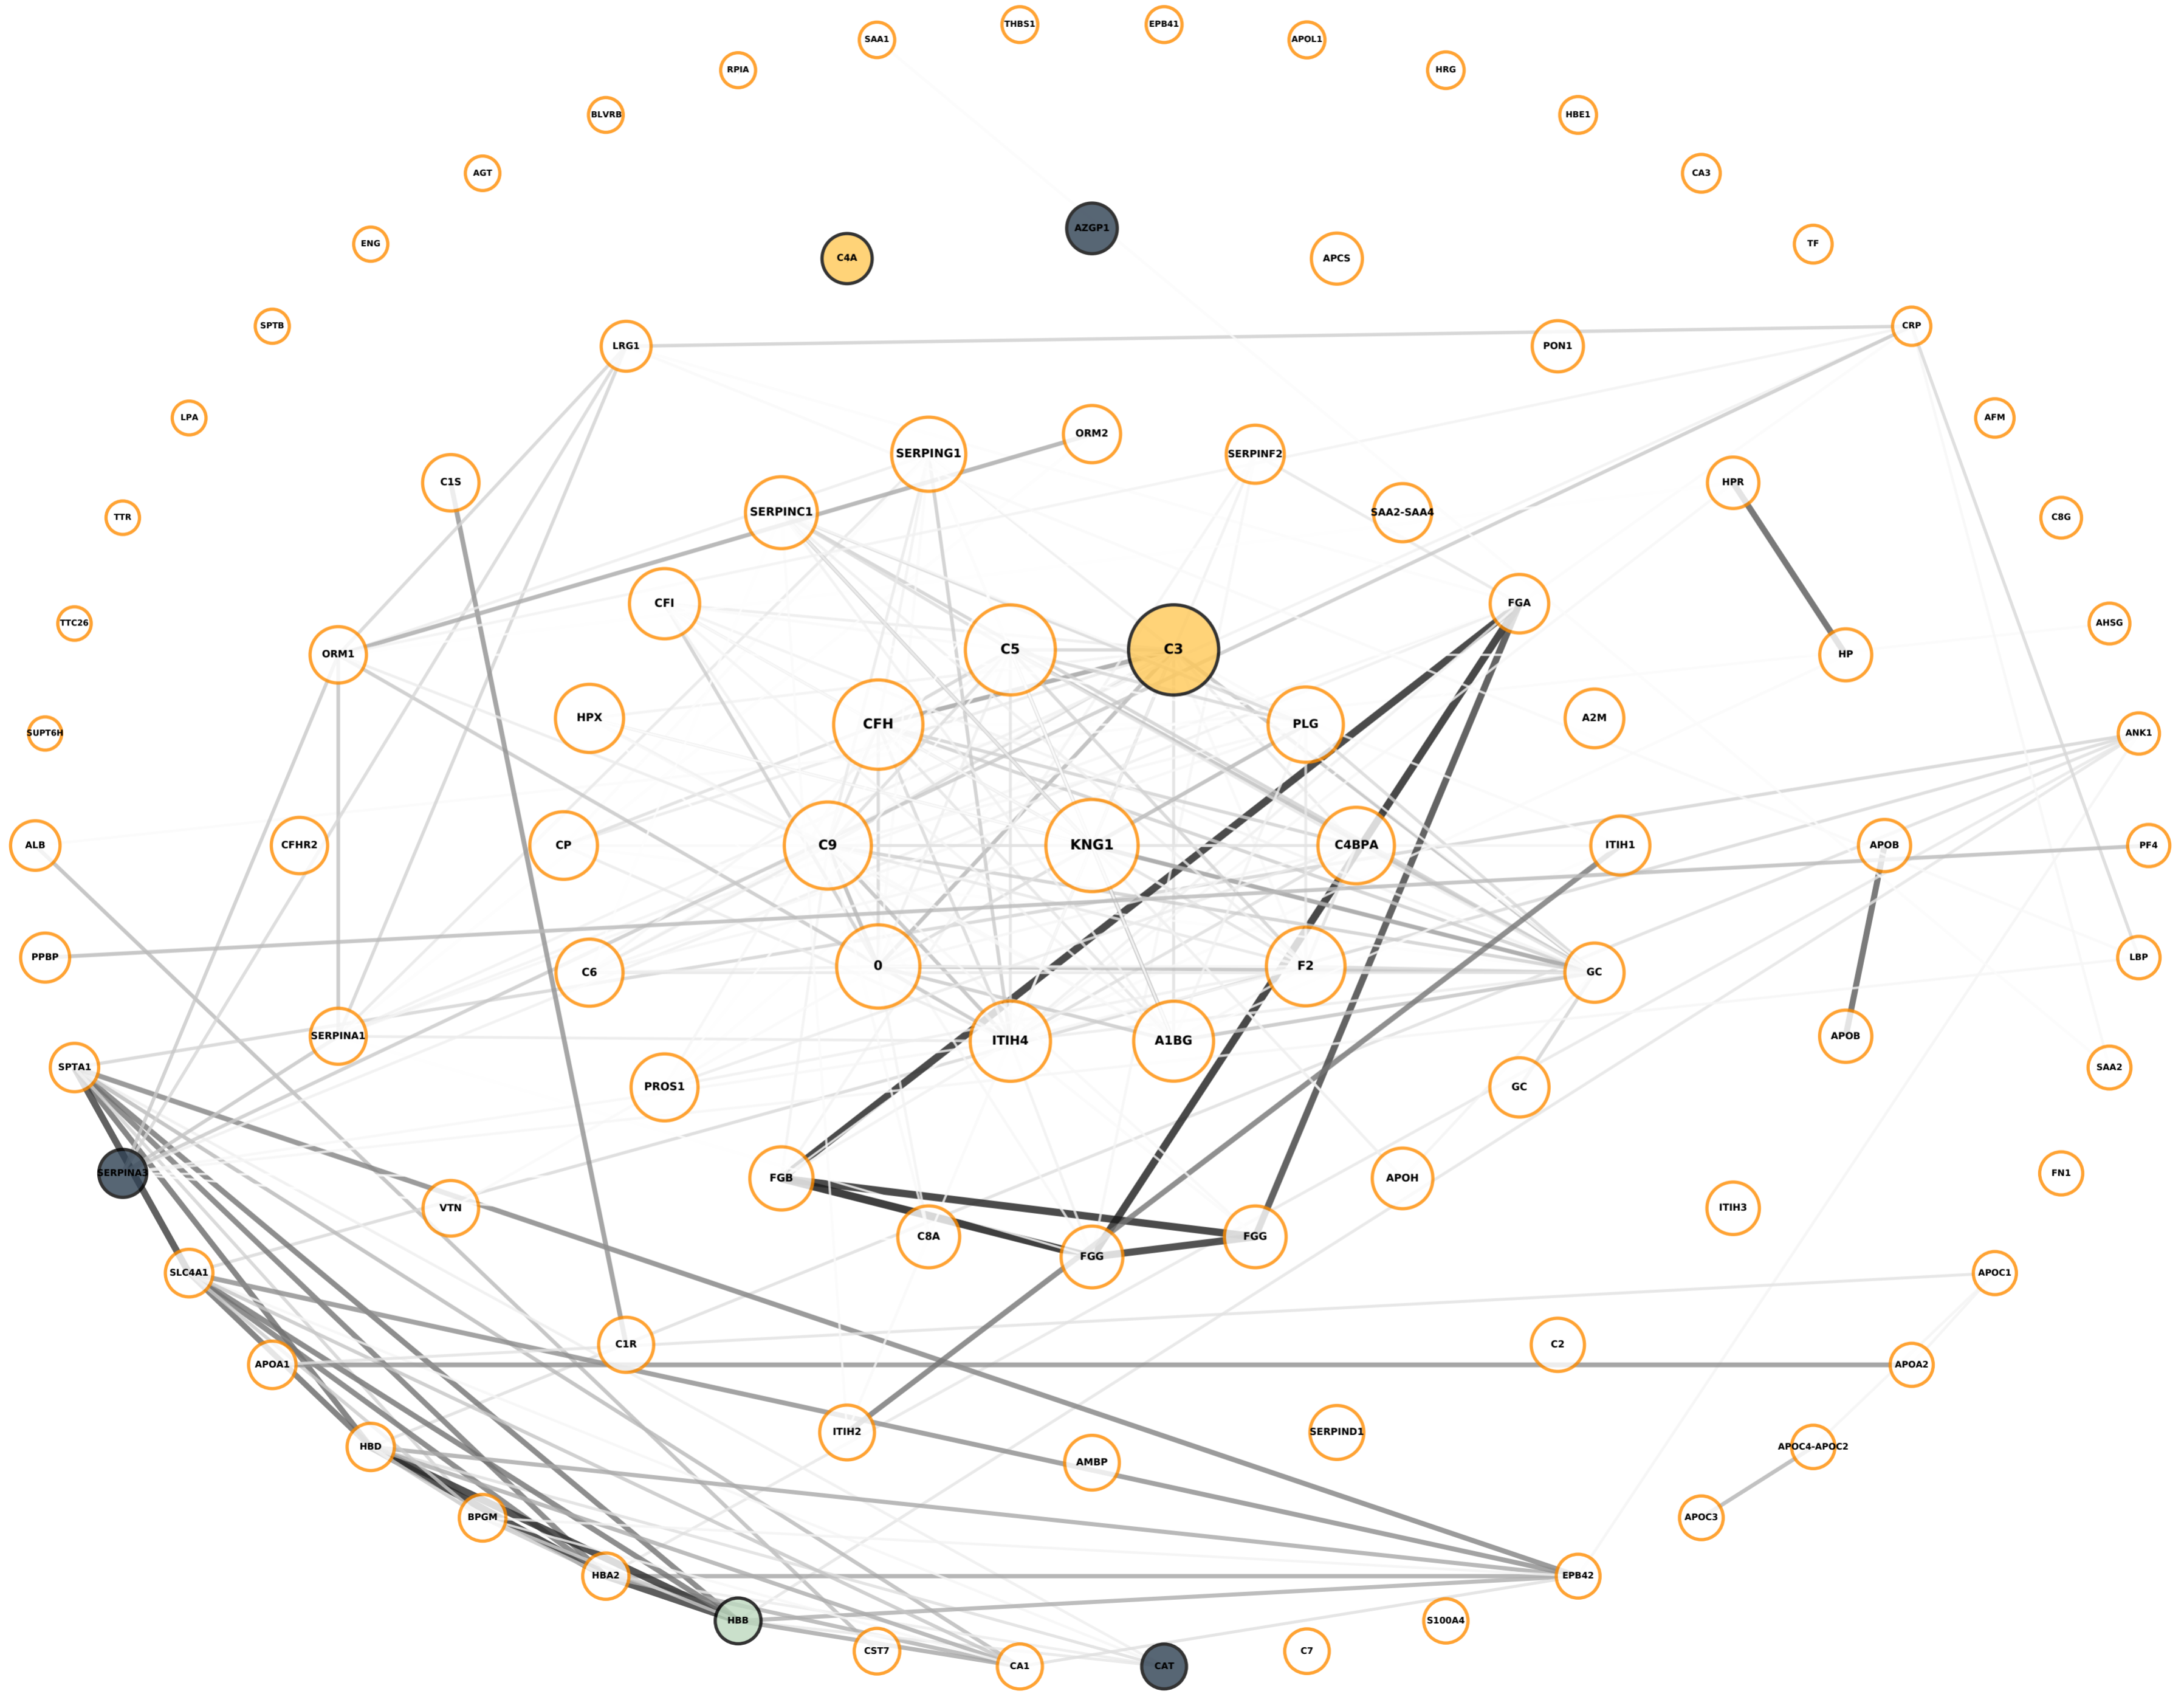



# Module 27, n = 93, FDR Corrected pvalue 1

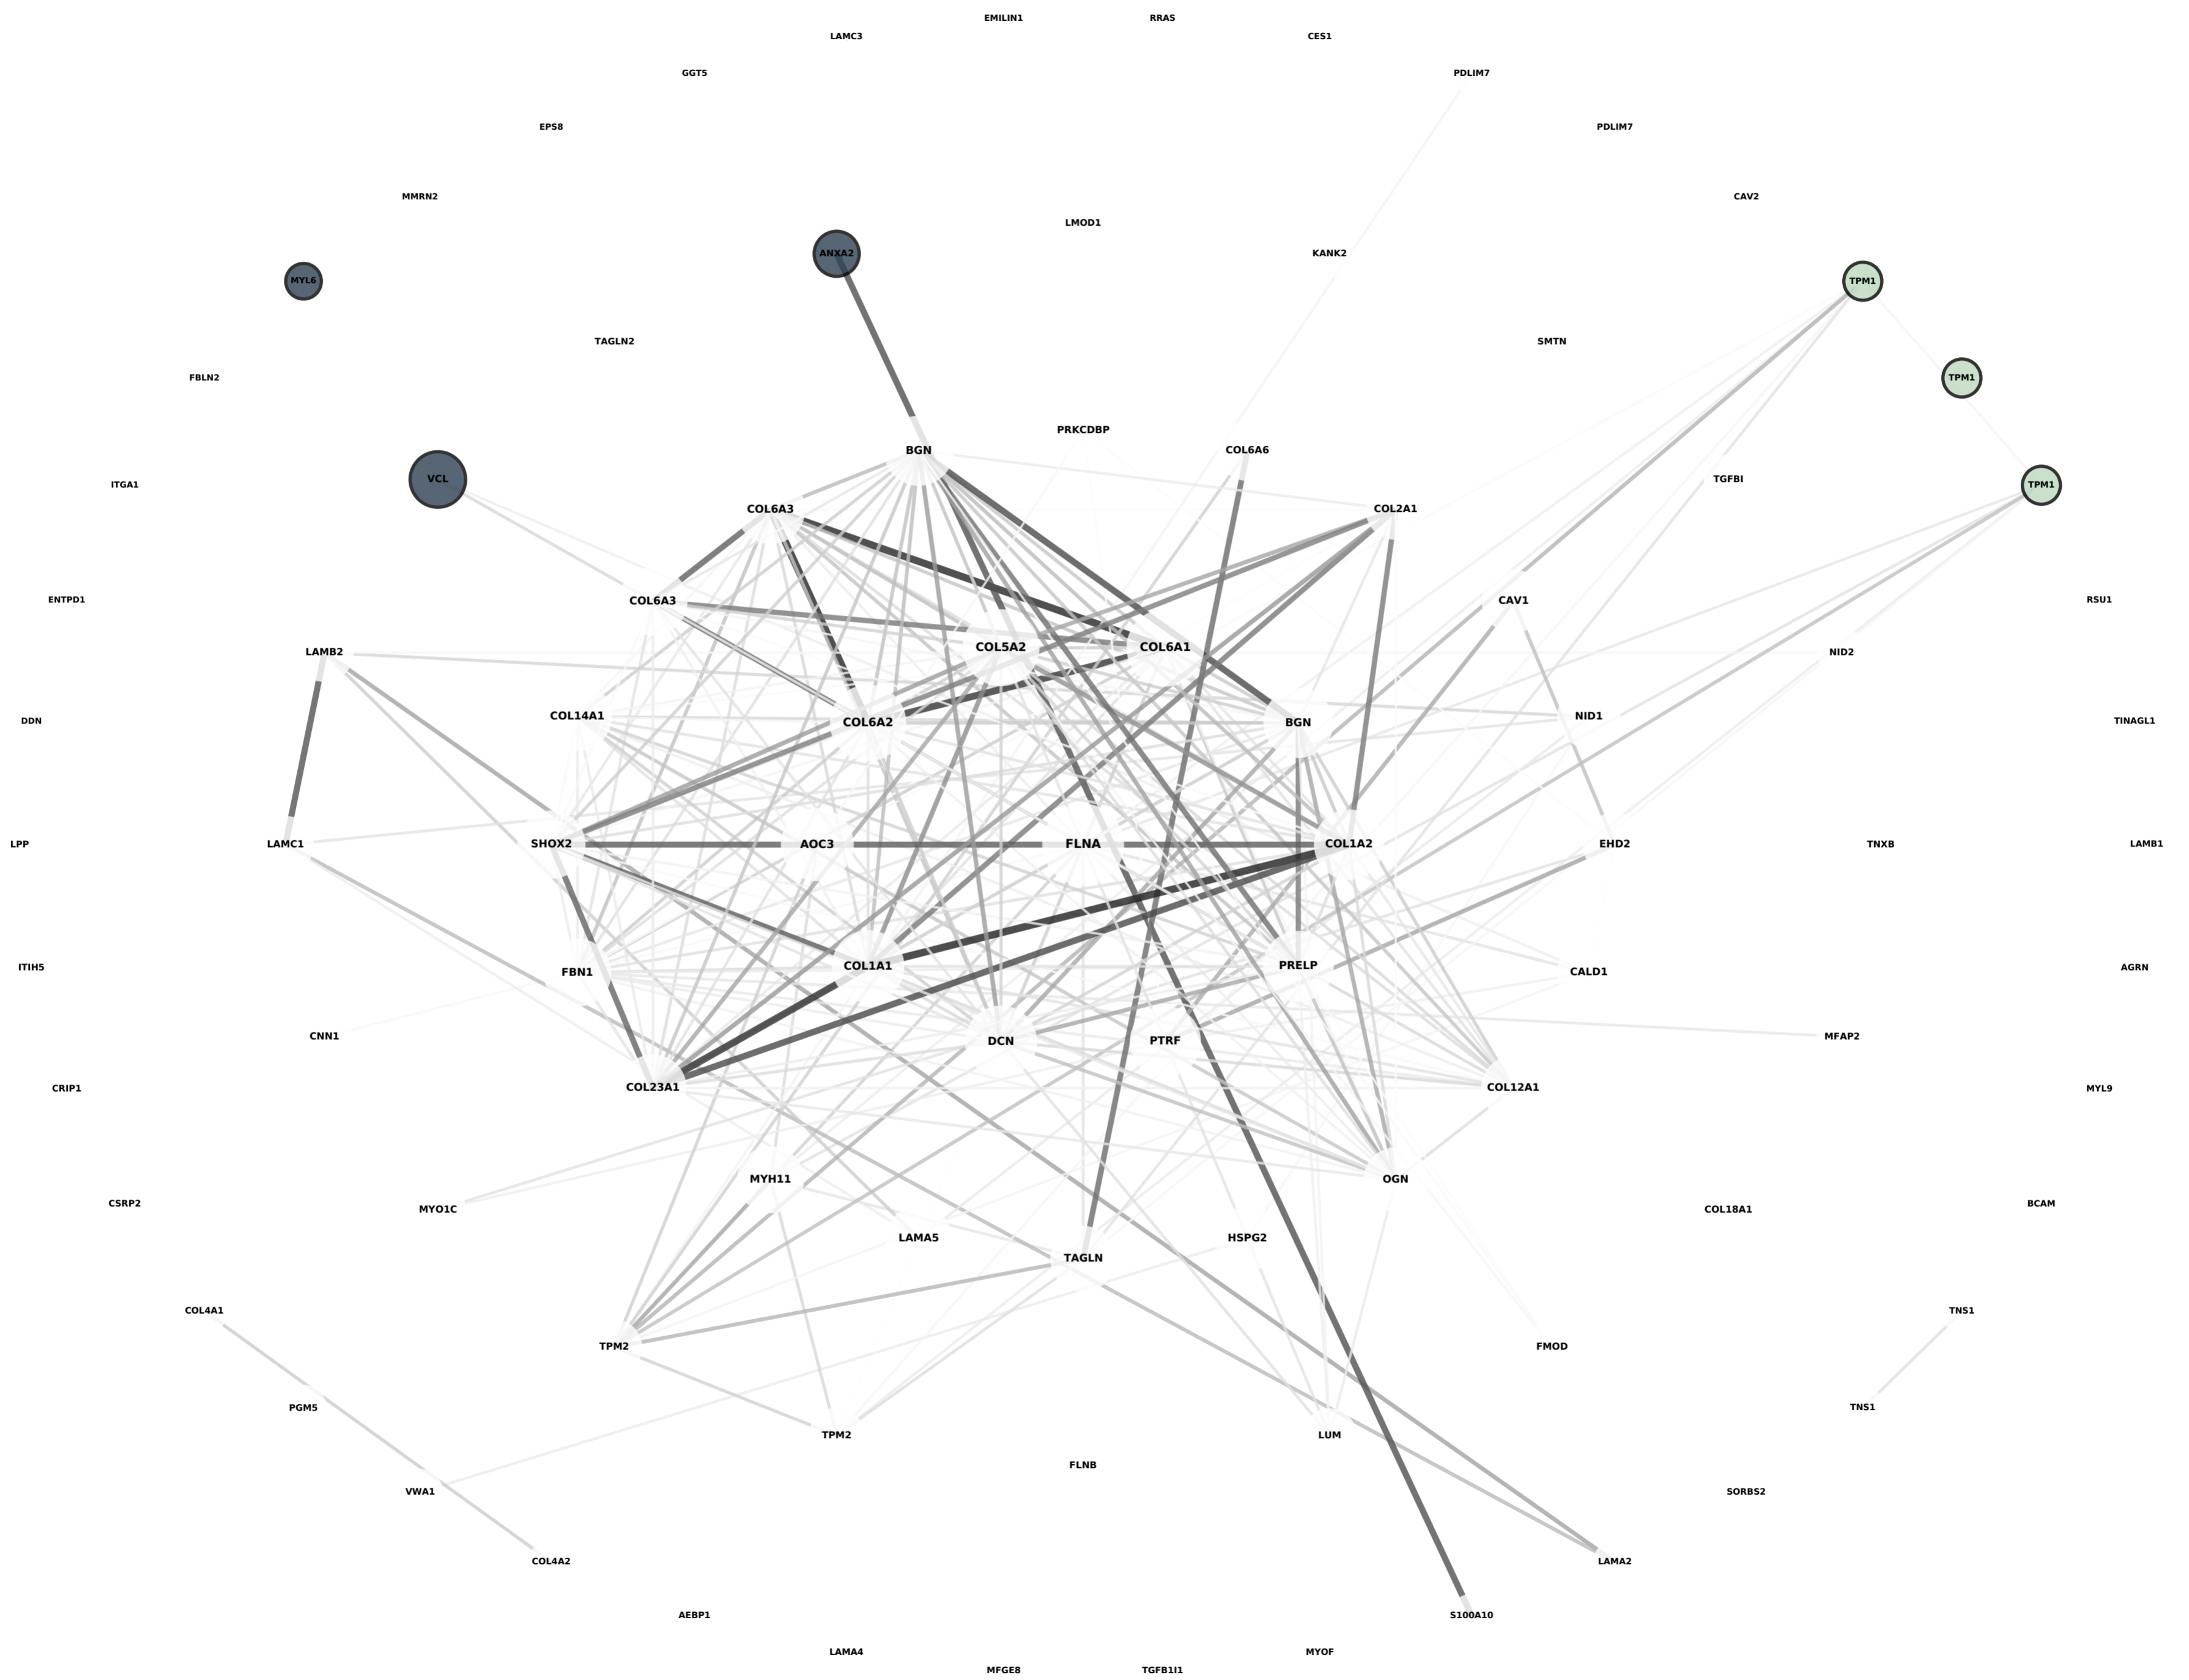

Module 28, n = 86,  
FDR Corrected pvalue 3.9464e-06

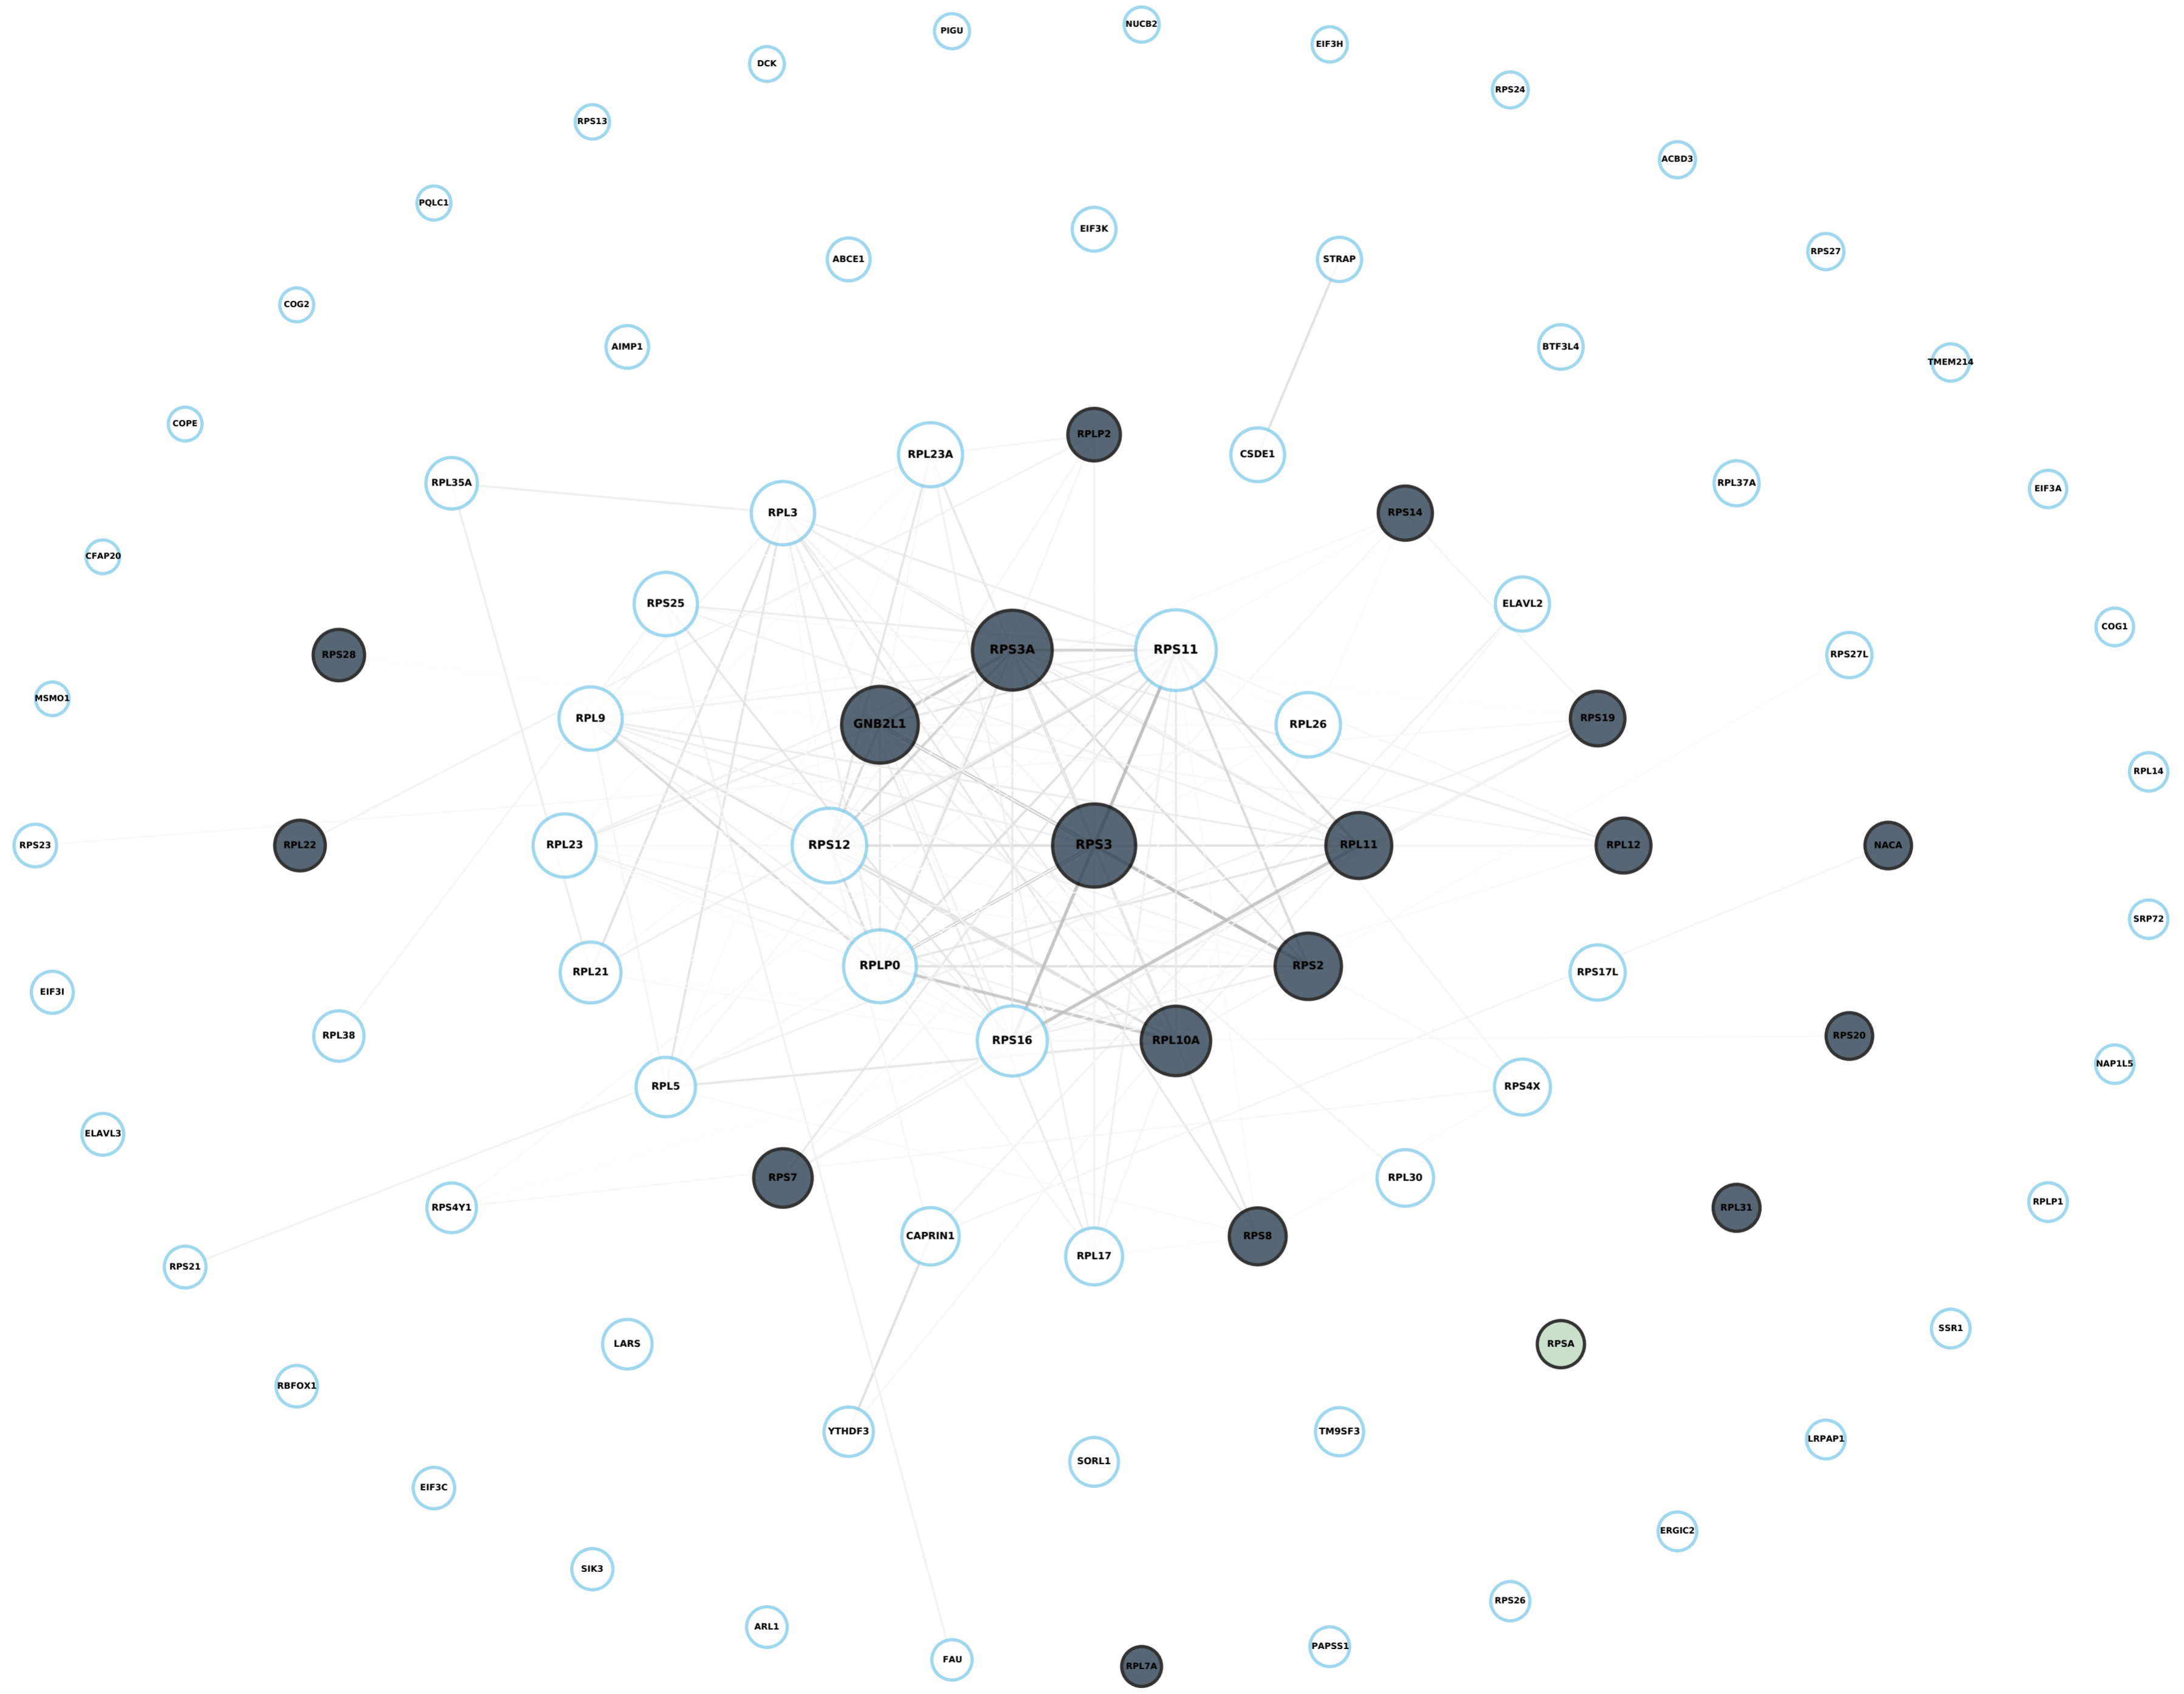

Module 29, n = 81,  
FDR Corrected pvalue 0.010991

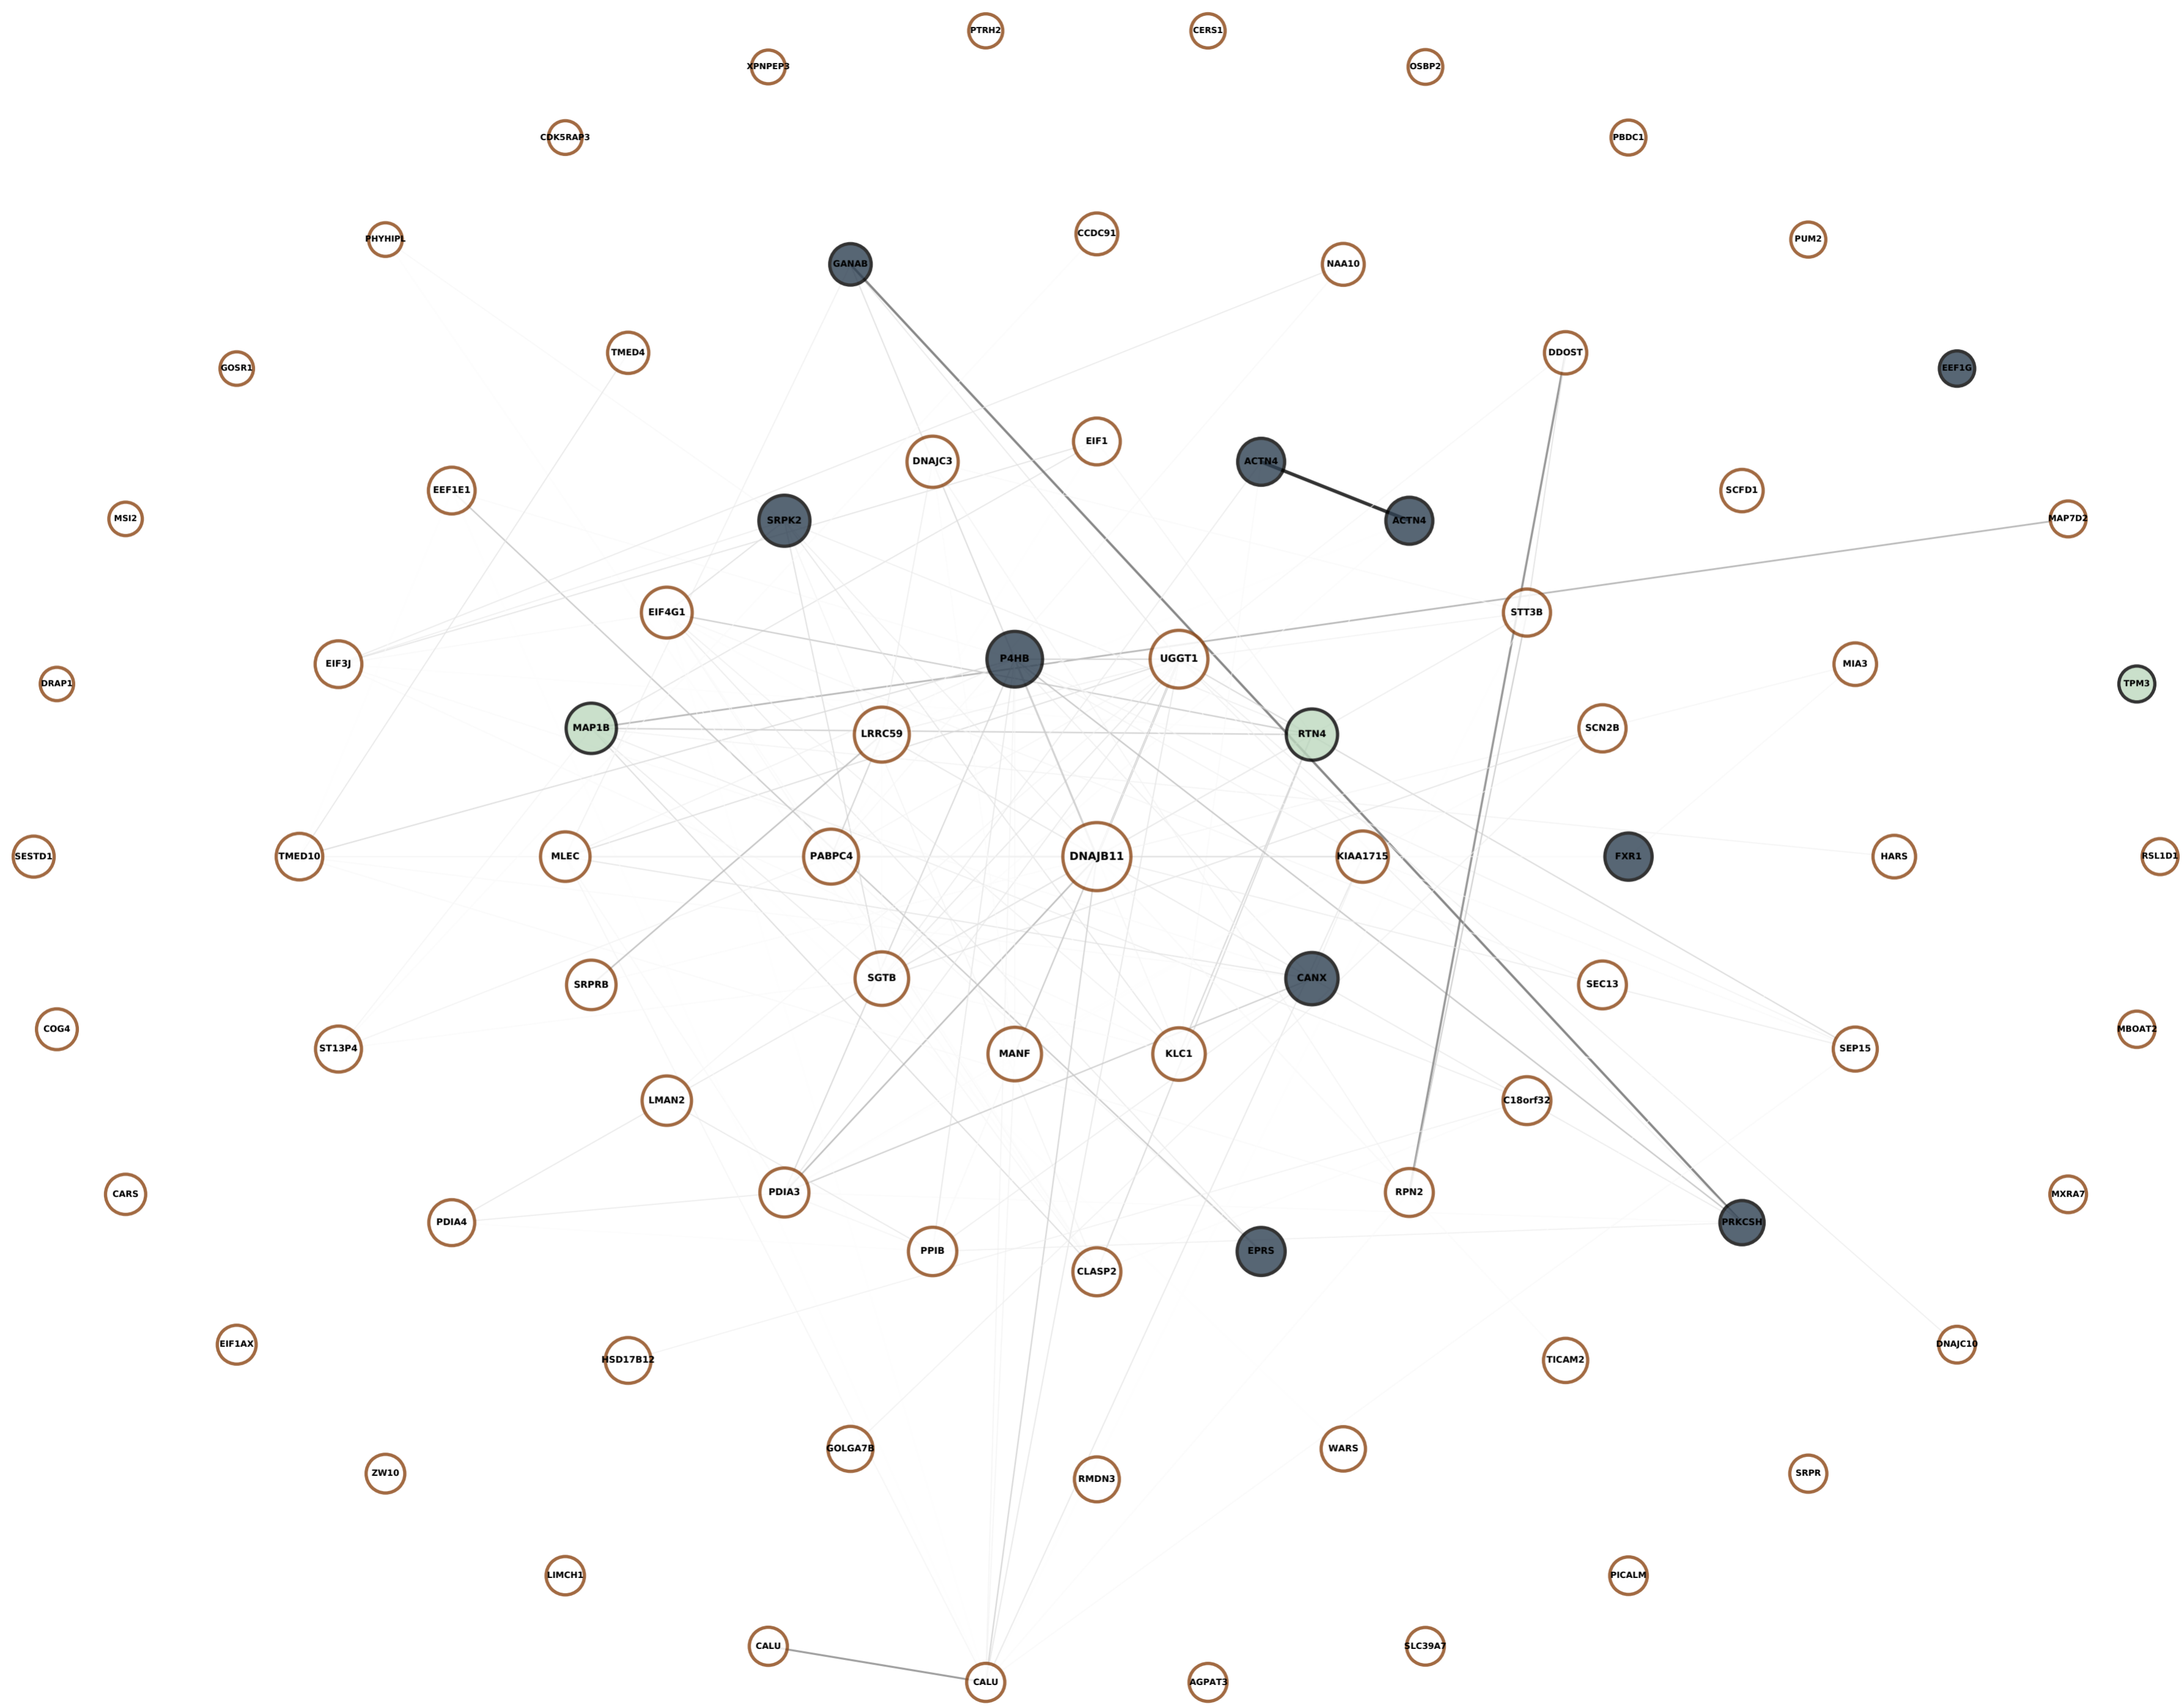



Module 30, n = 73,  
FDR Corrected pvalue 0.0016322

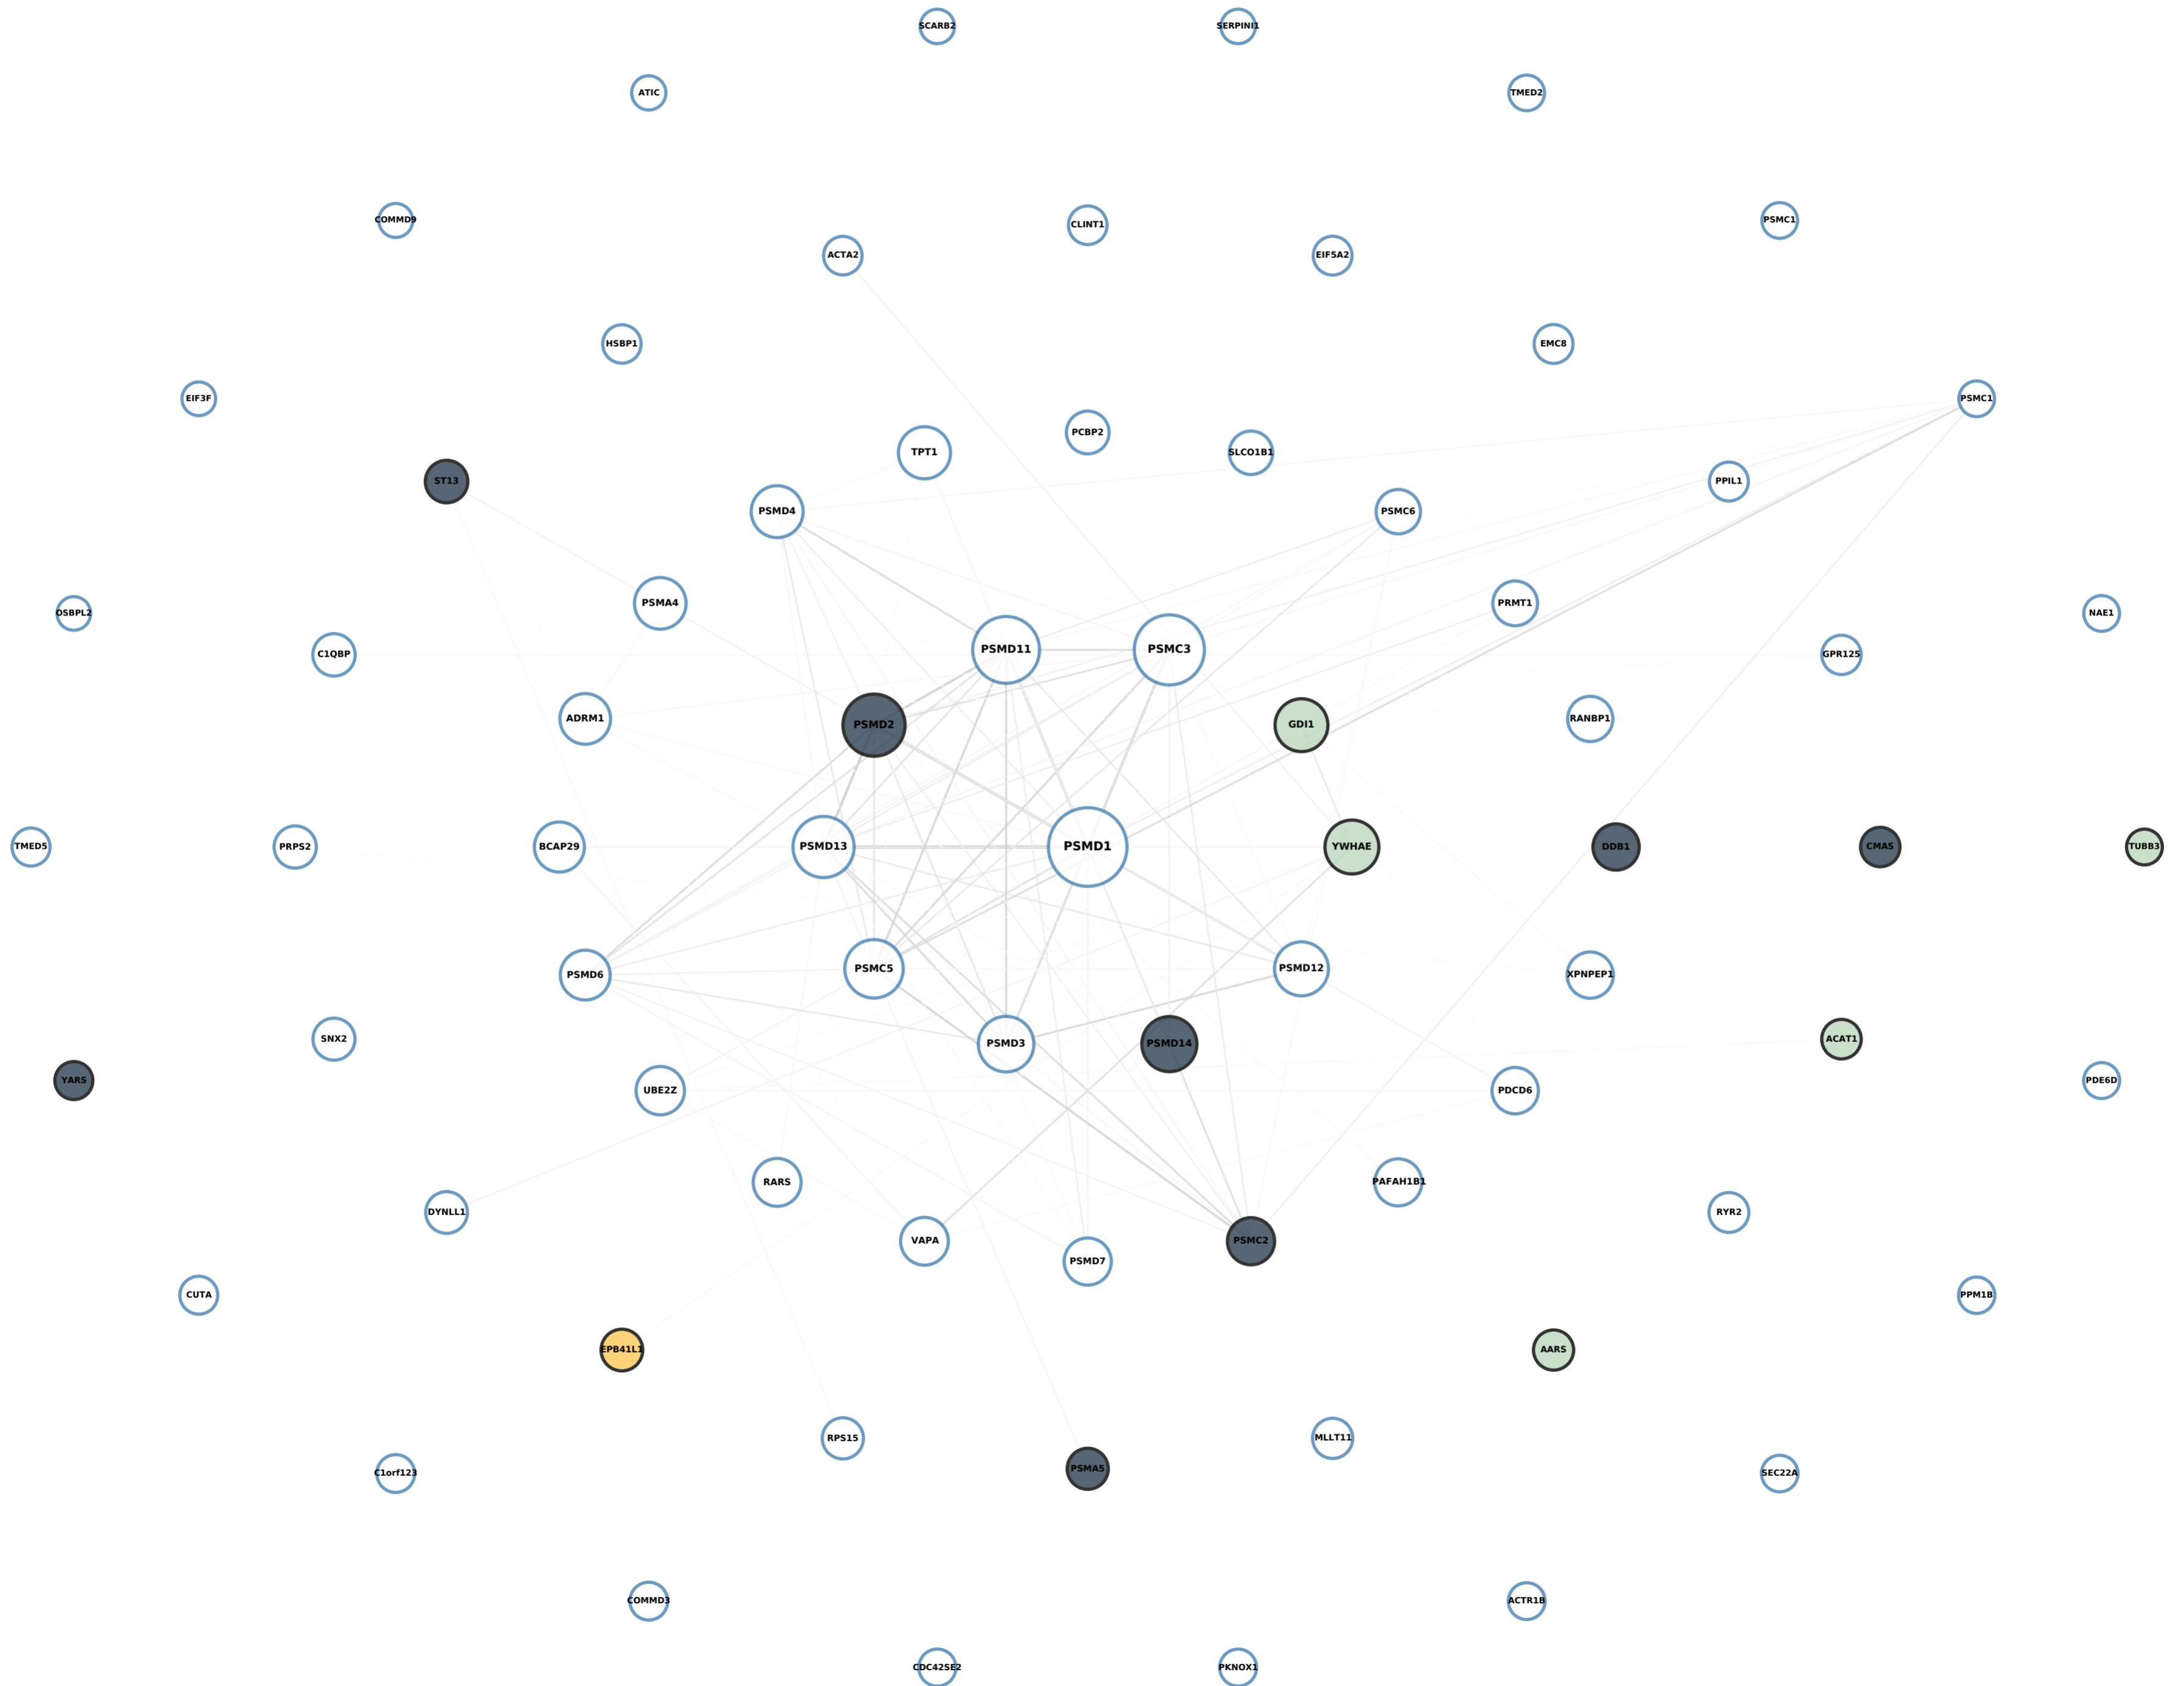

Module 31, n = 72,  
FDR Corrected pvalue 0.99401

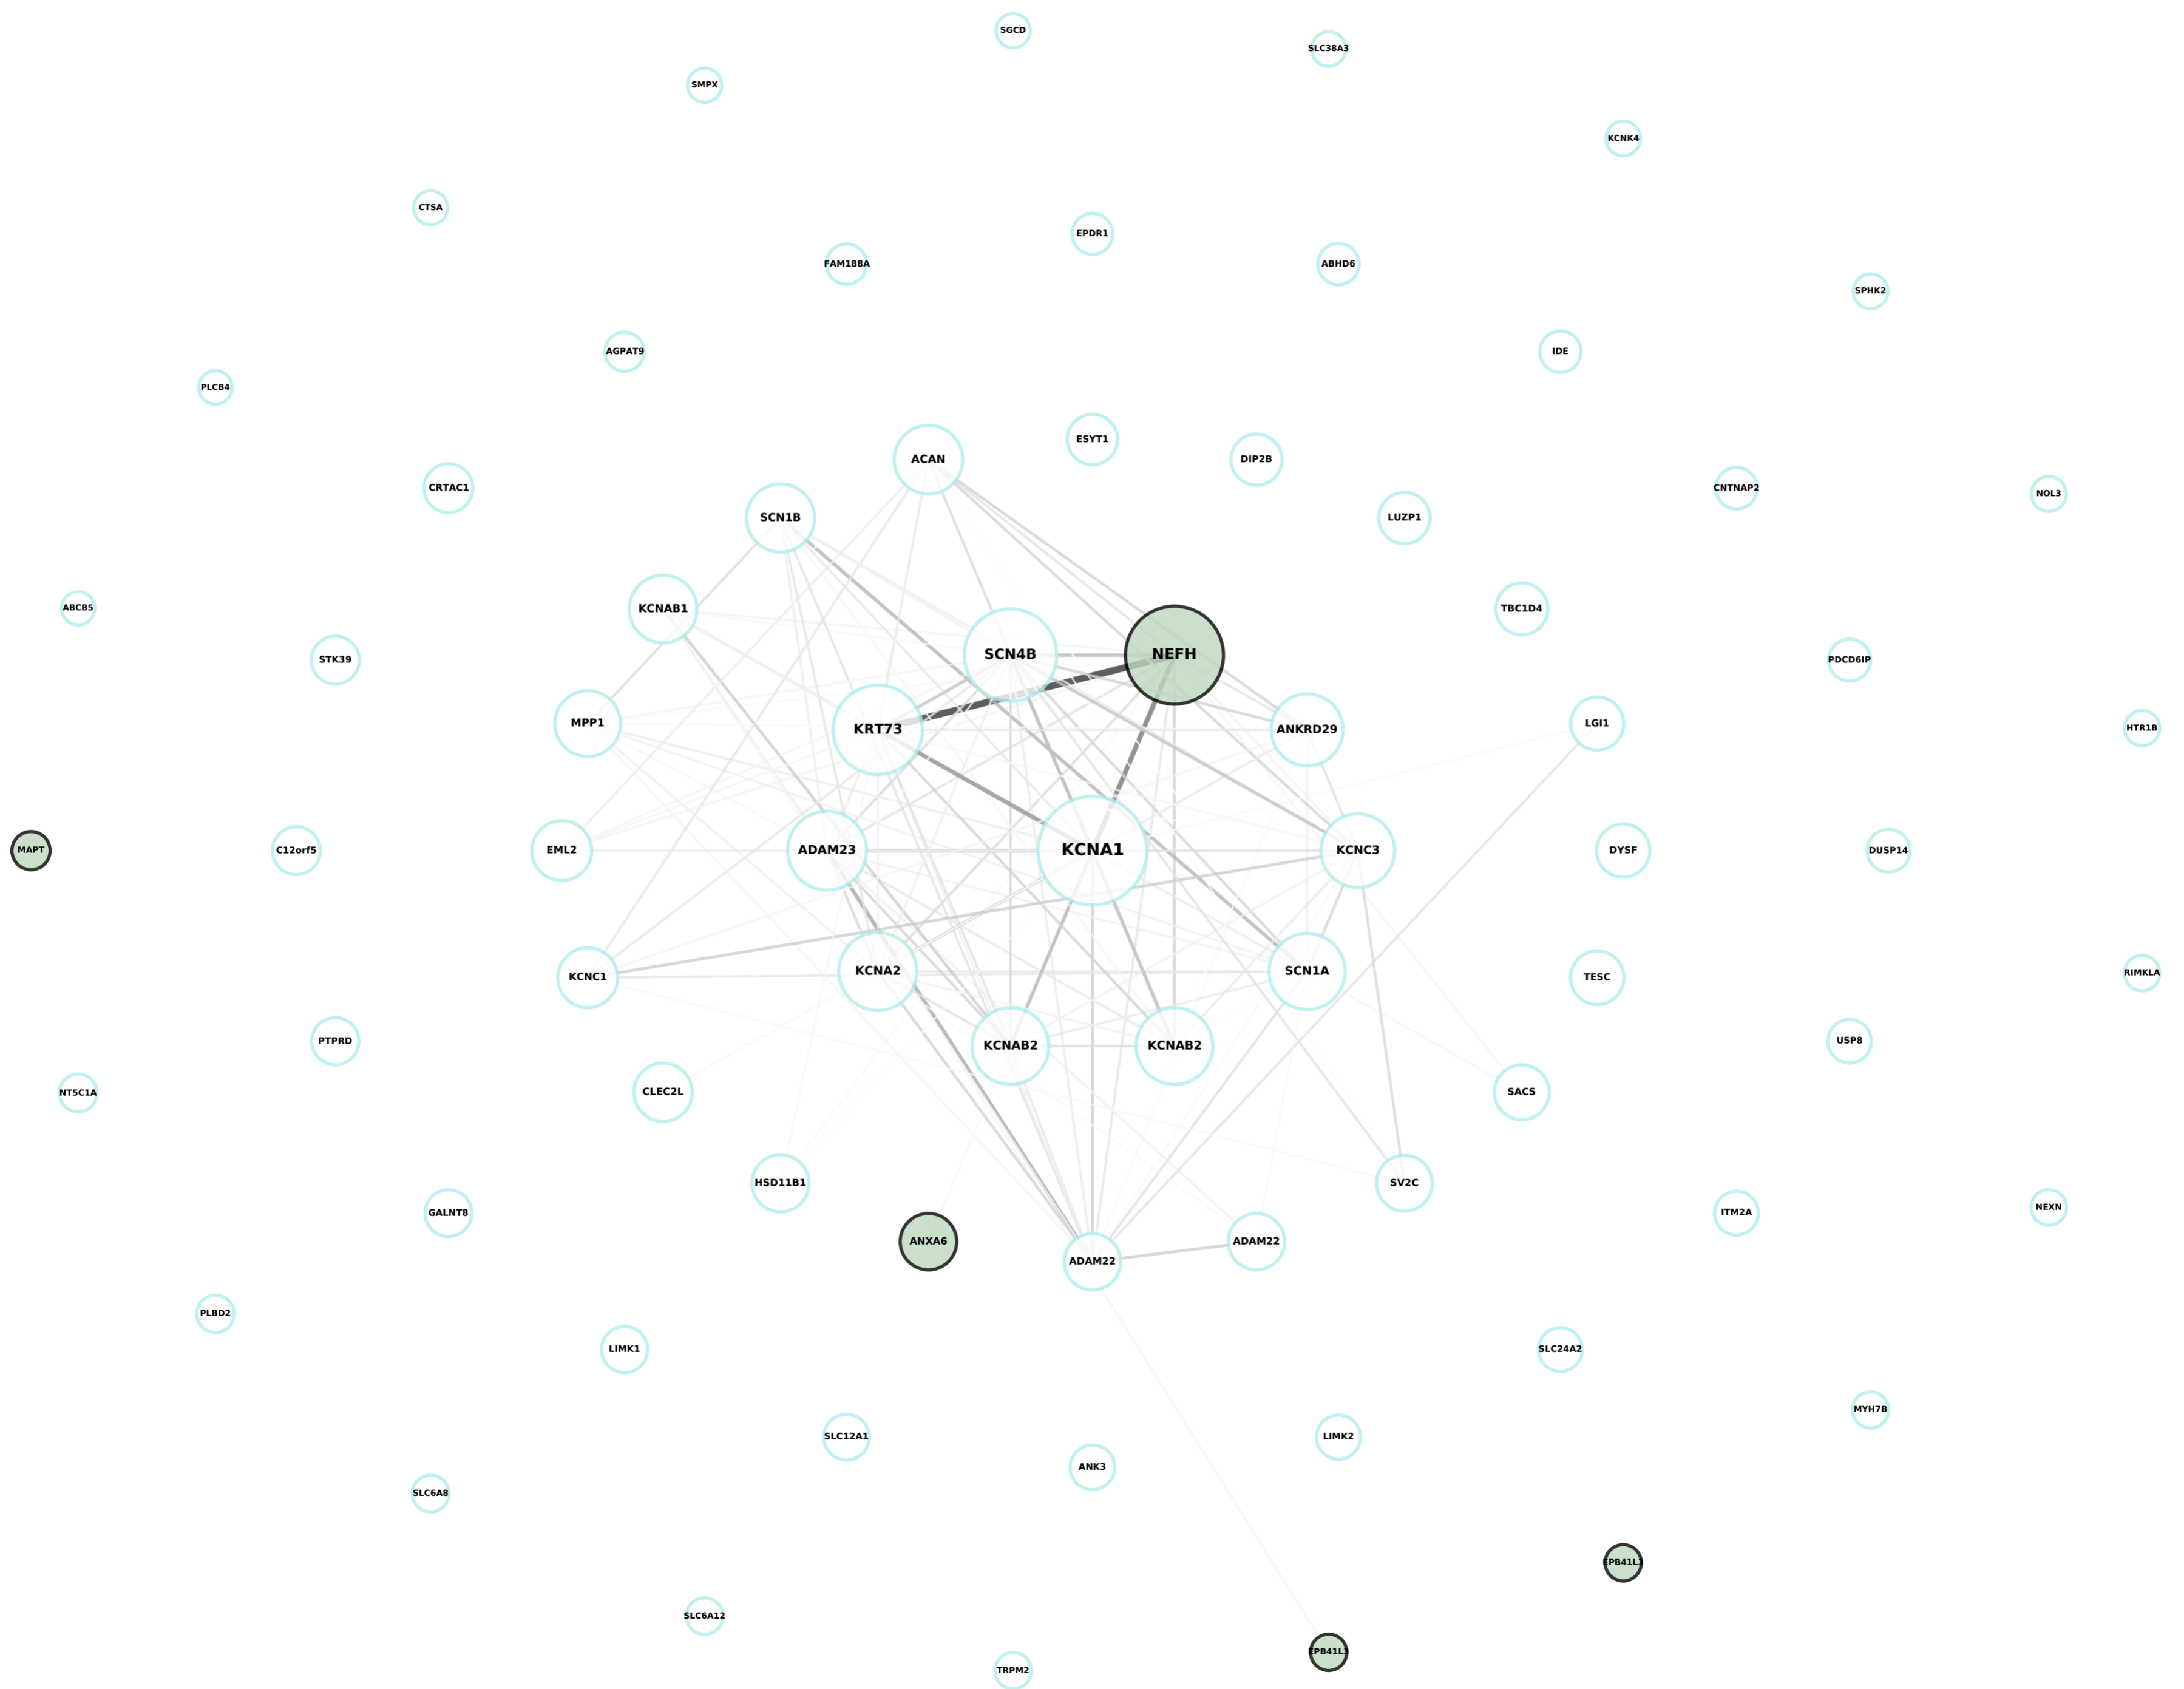



Module 32, n = 72,  
FDR Corrected pvalue 1

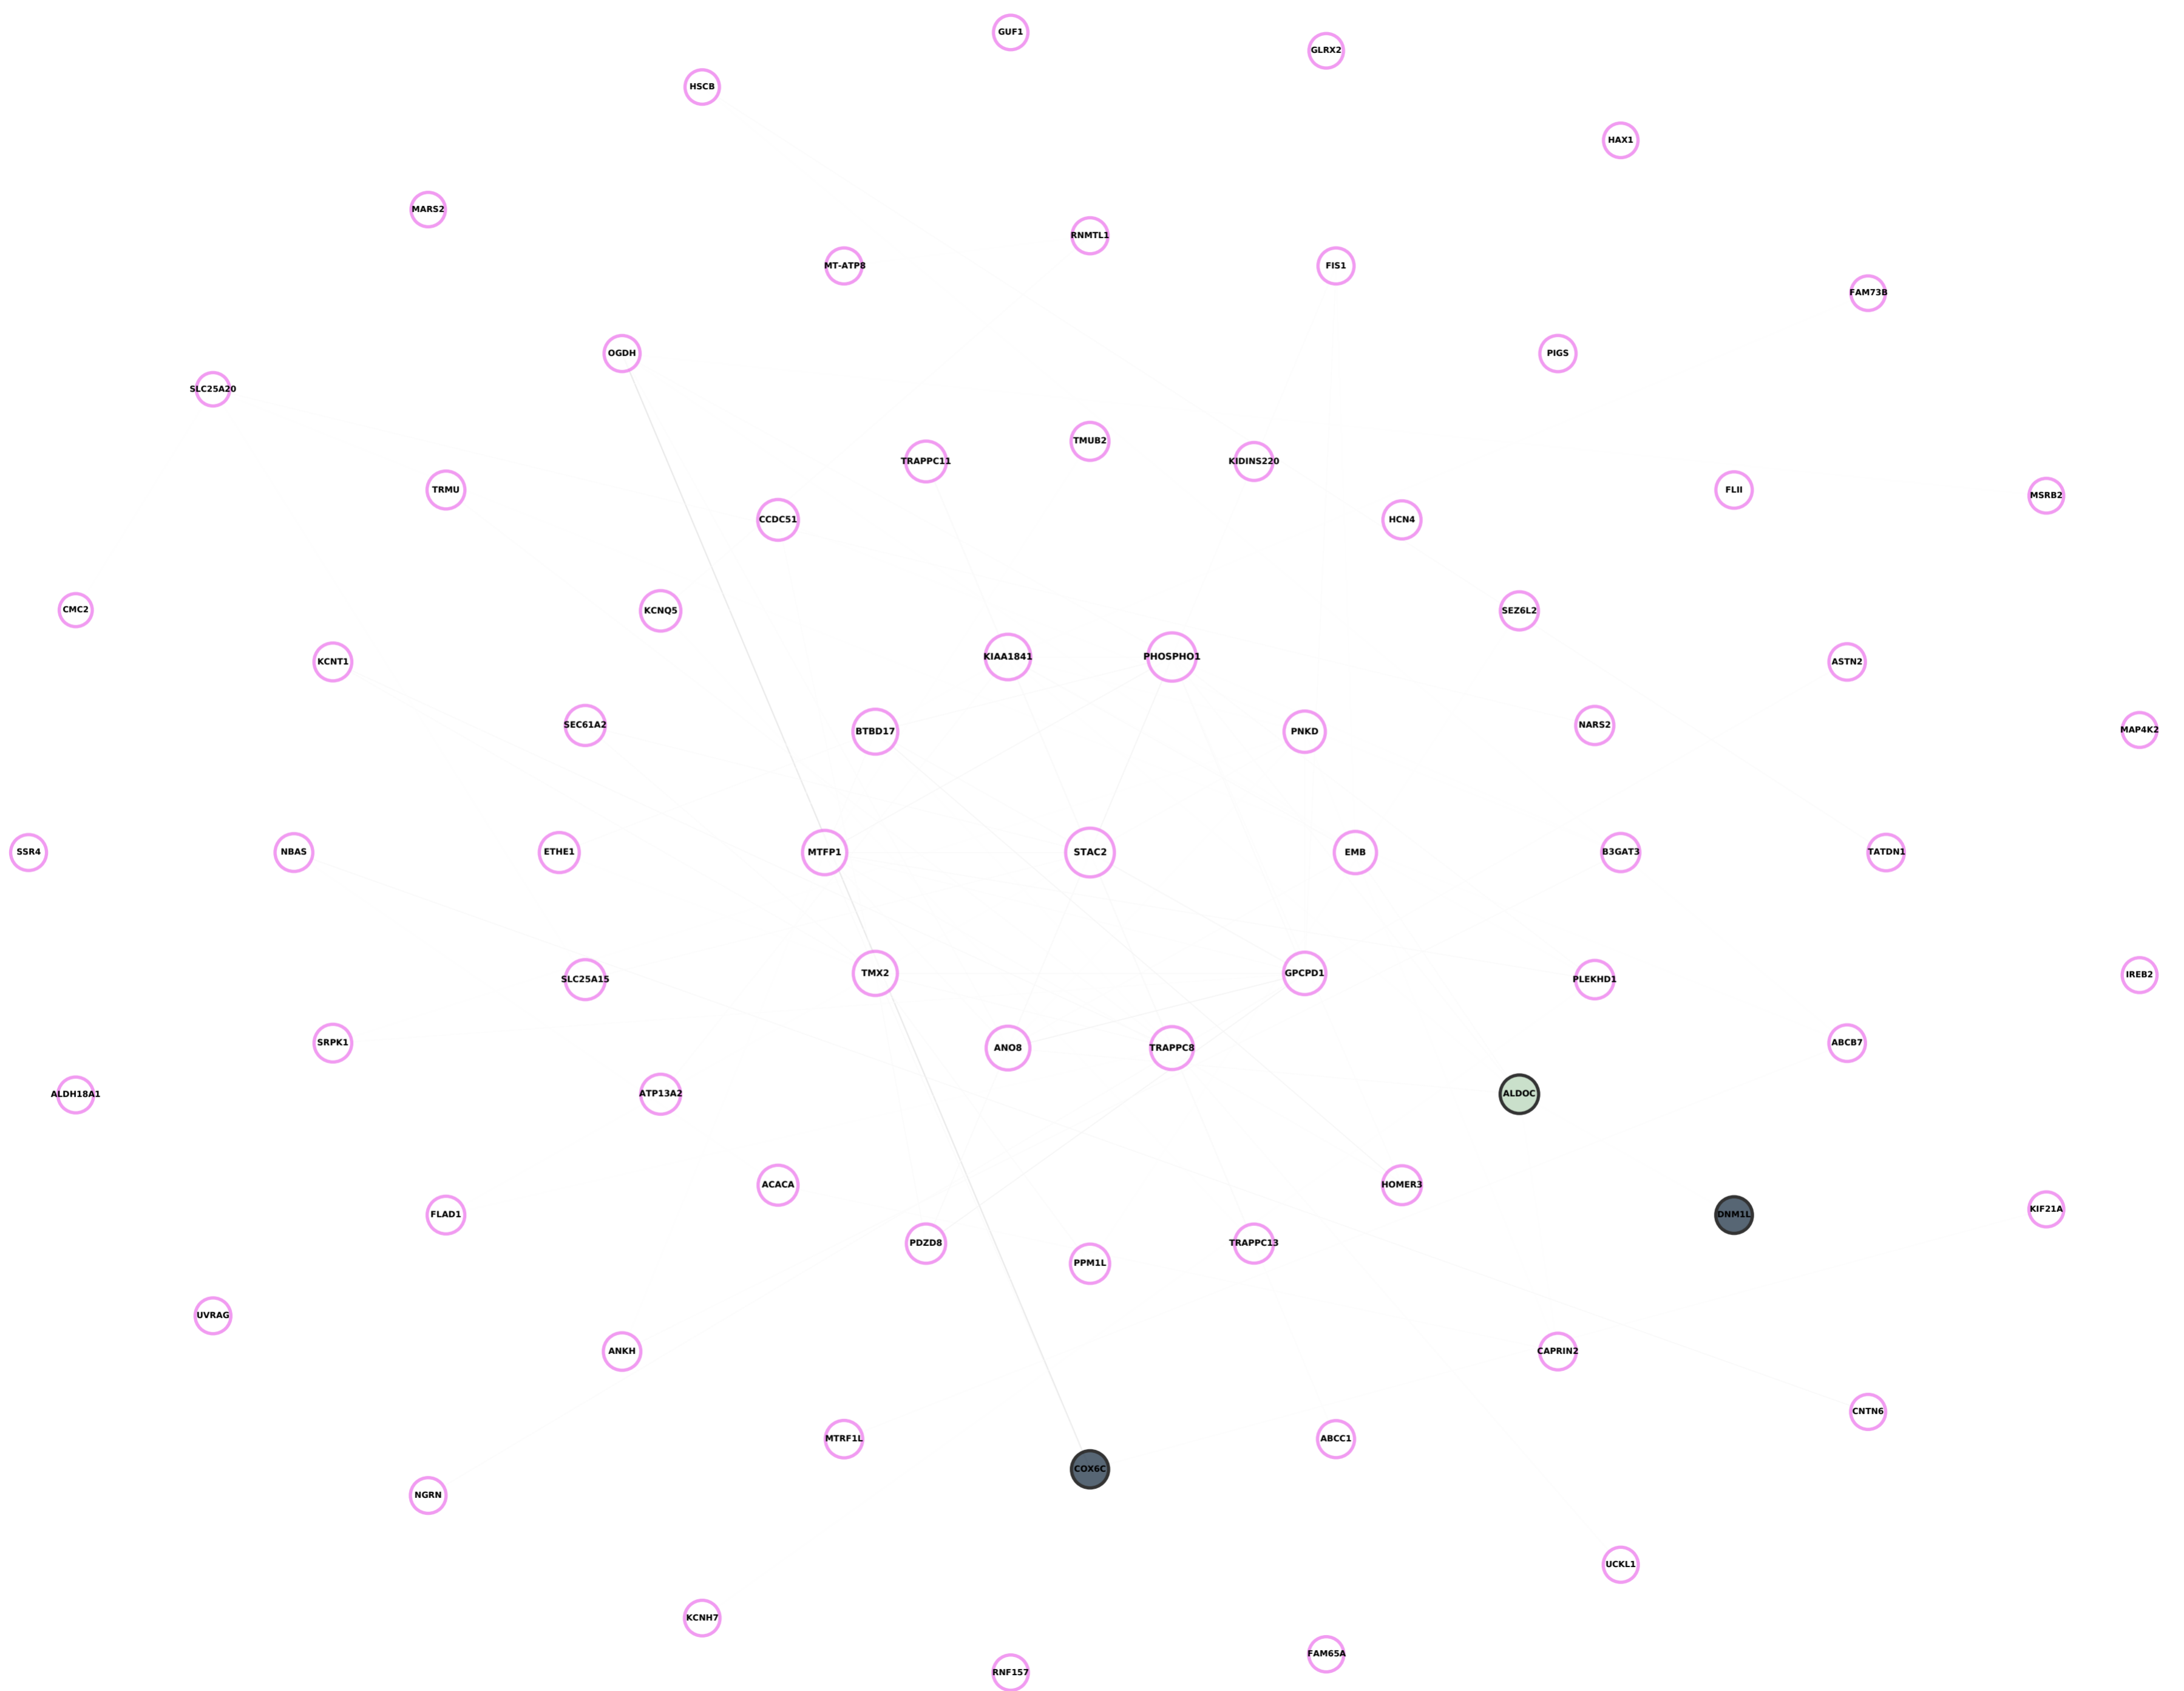

Module 33, n = 65,  
FDR Corrected pvalue 1

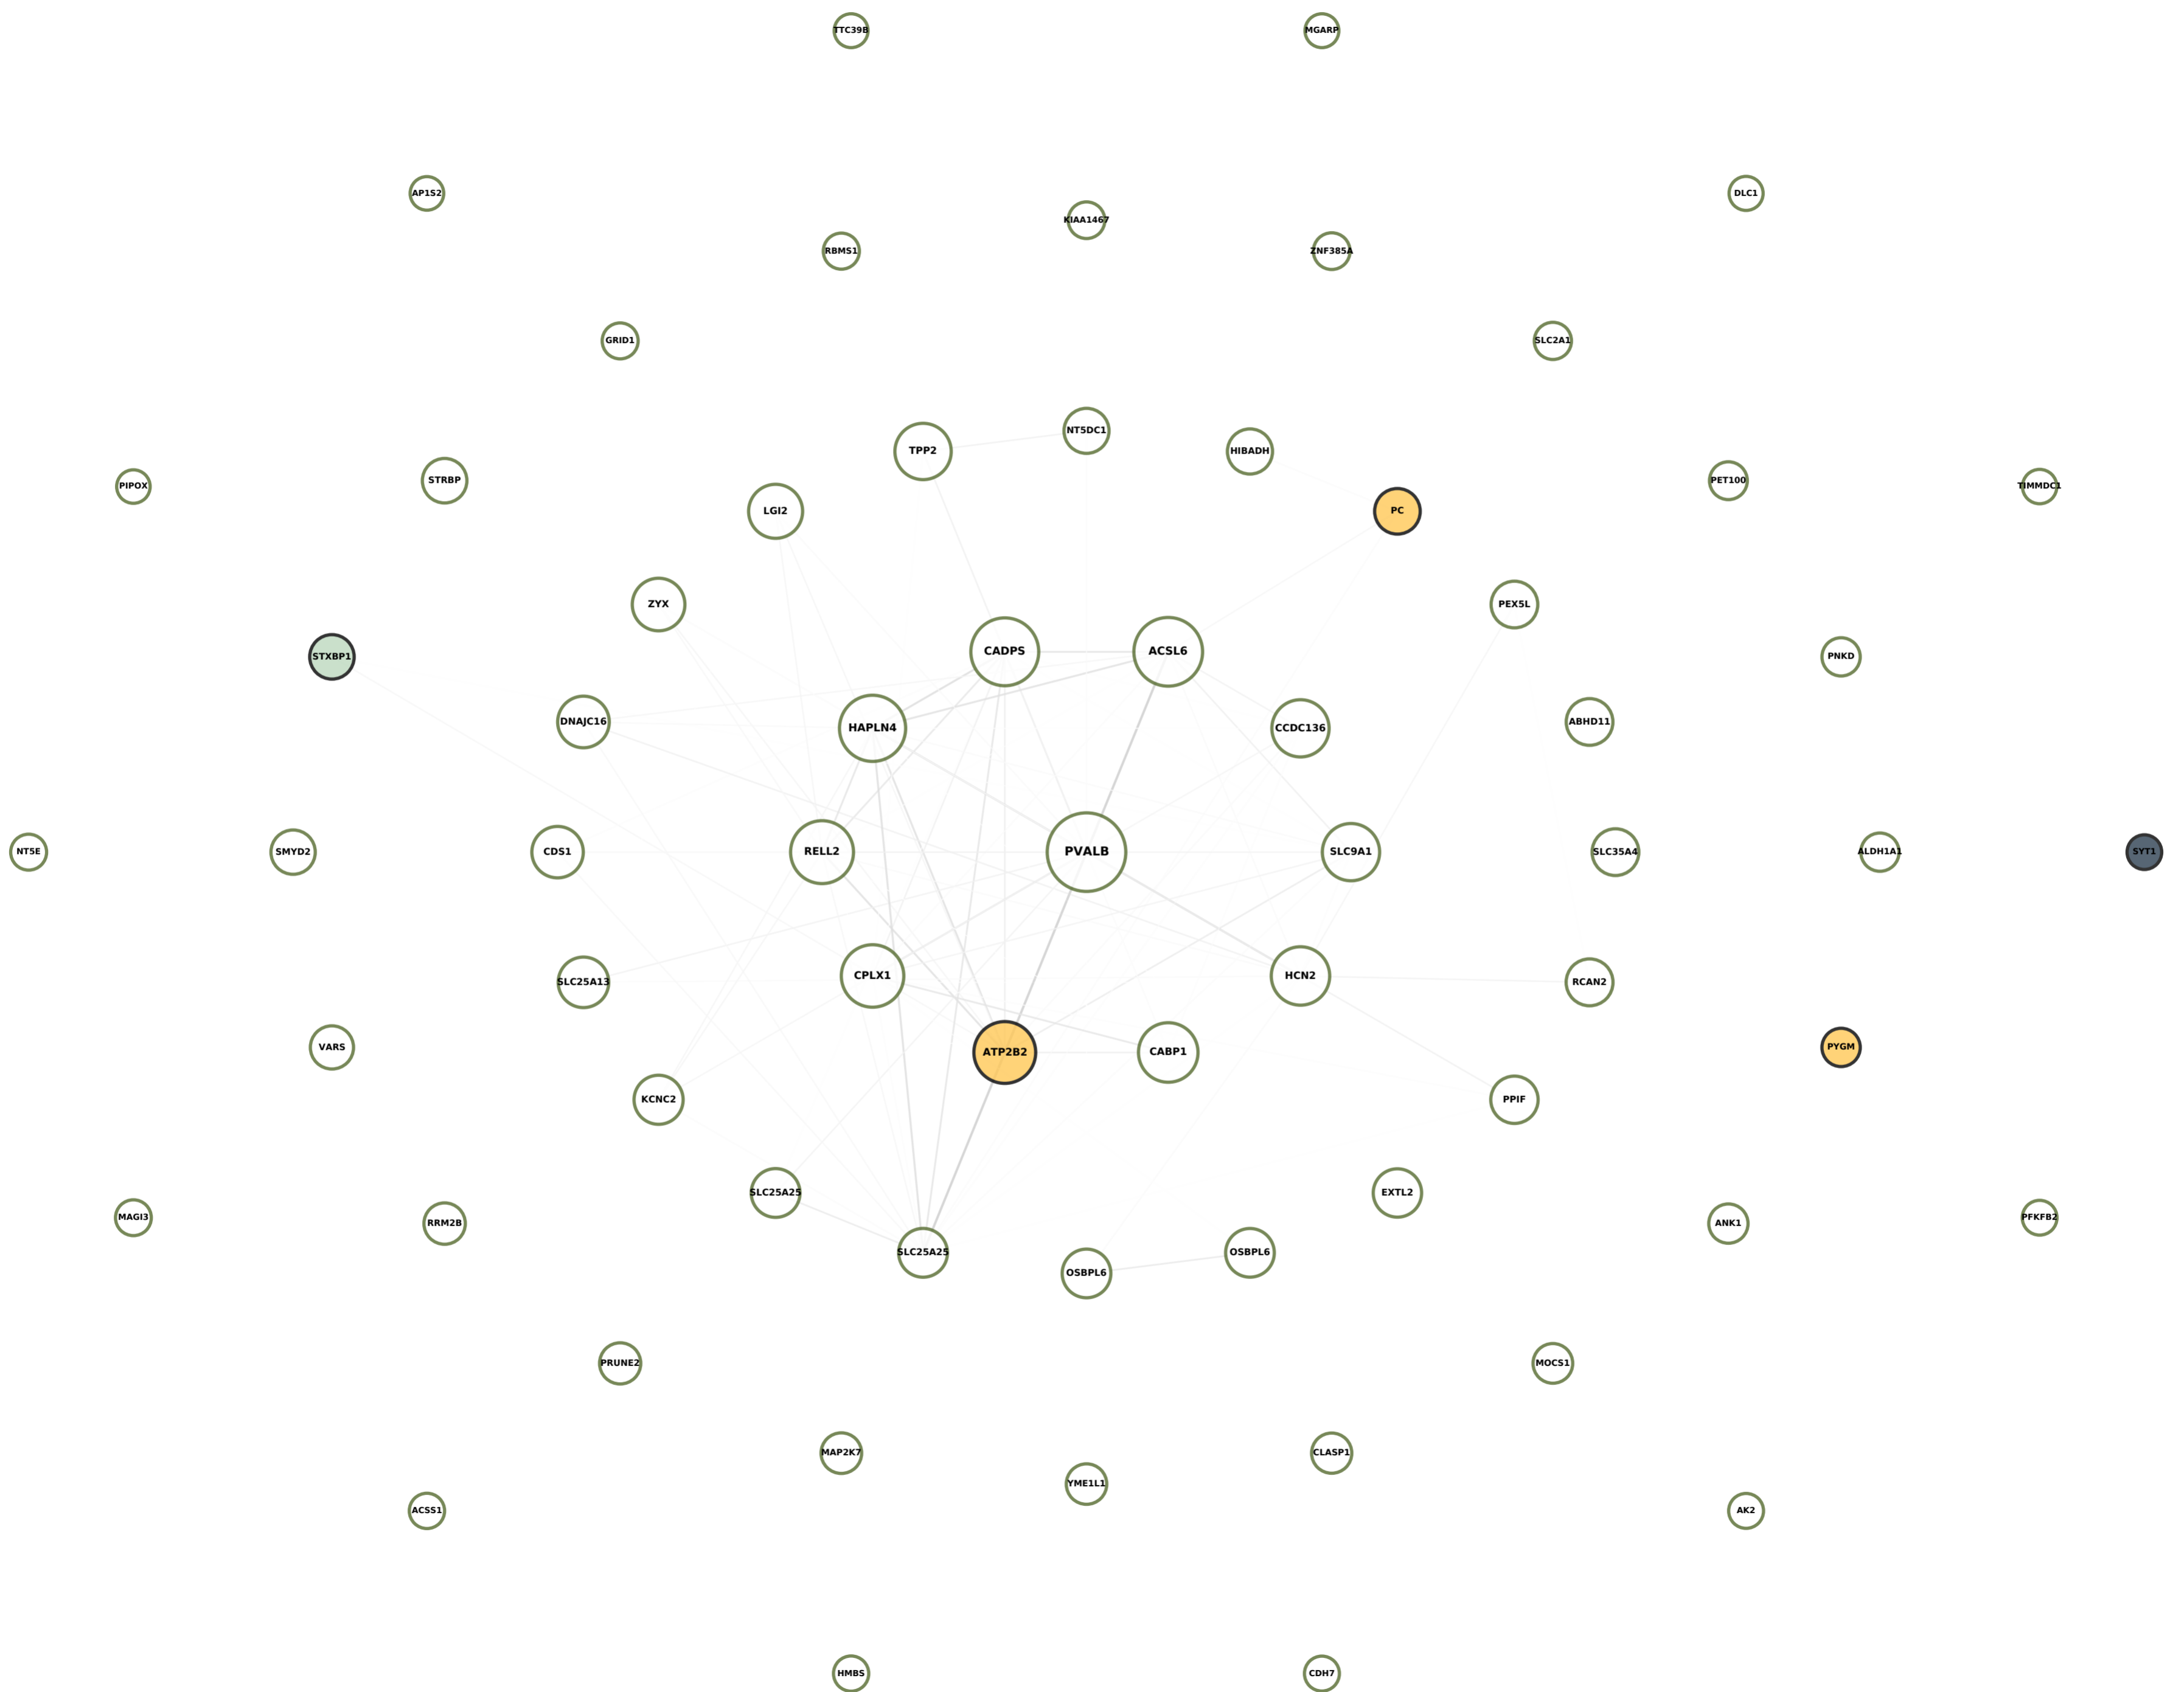



Module 34, n = 61,  
FDR Corrected pvalue 0.86525

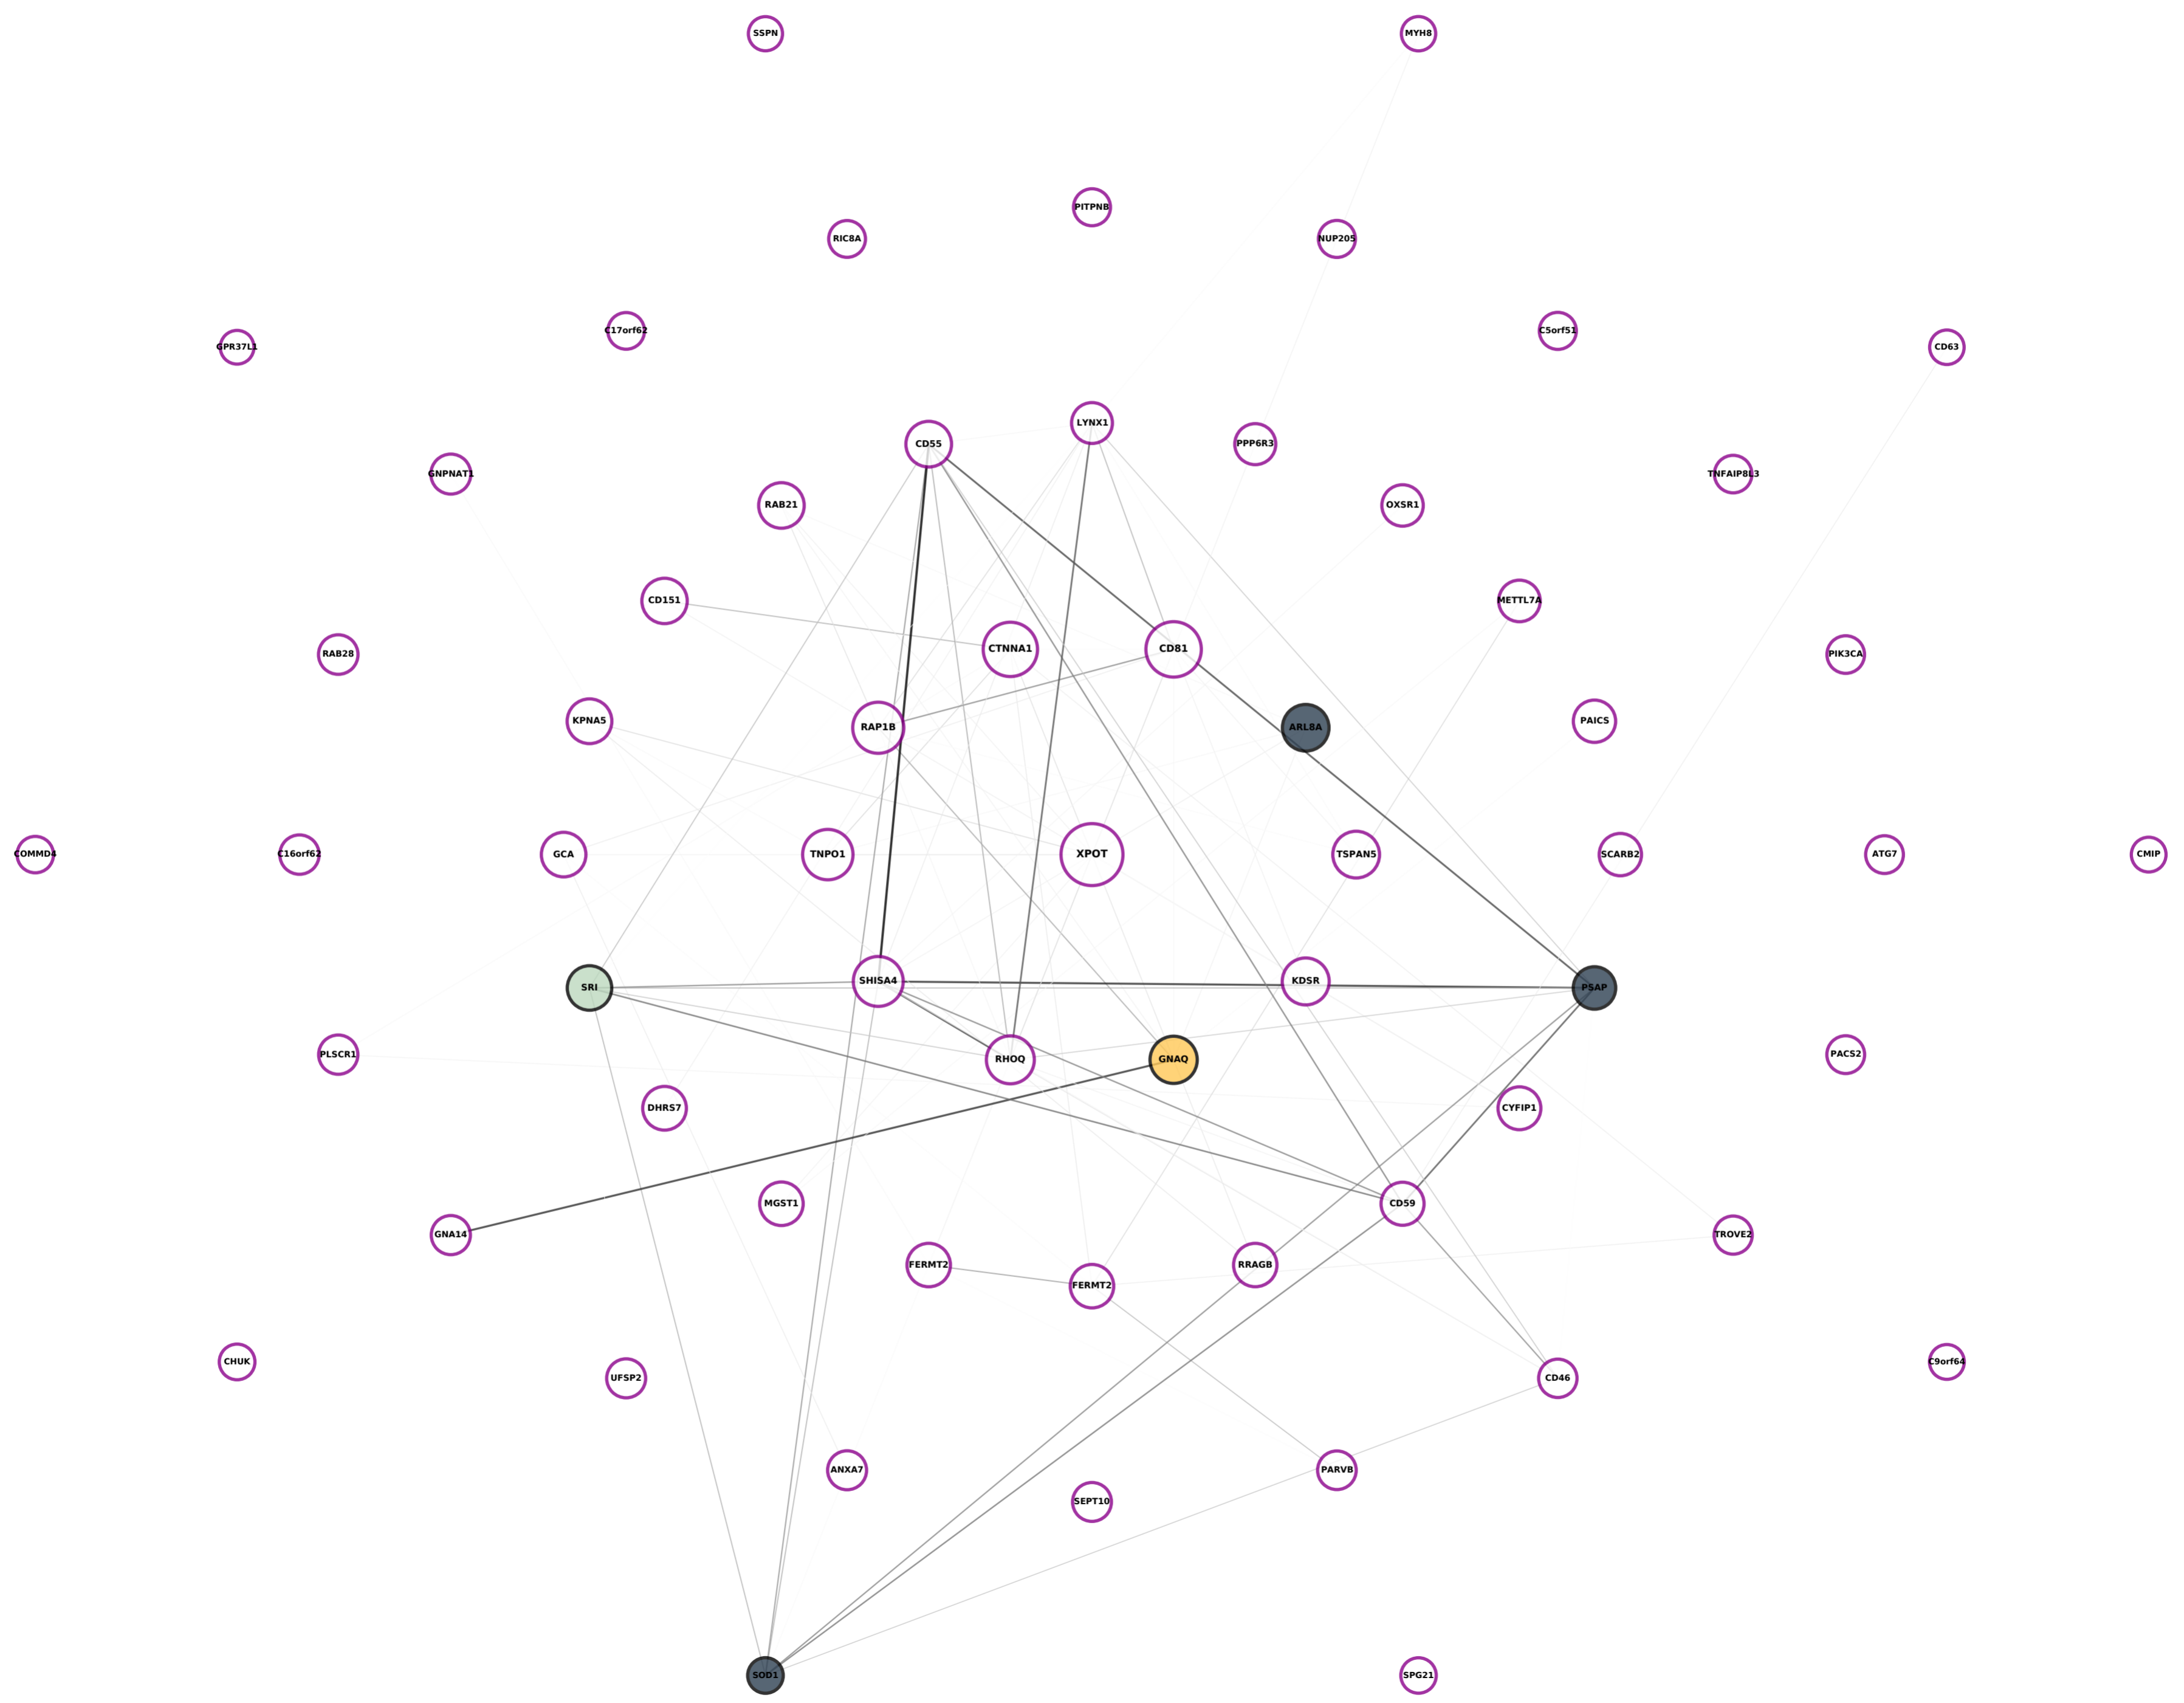

Module 35, n = 60,  
FDR Corrected pvalue 1

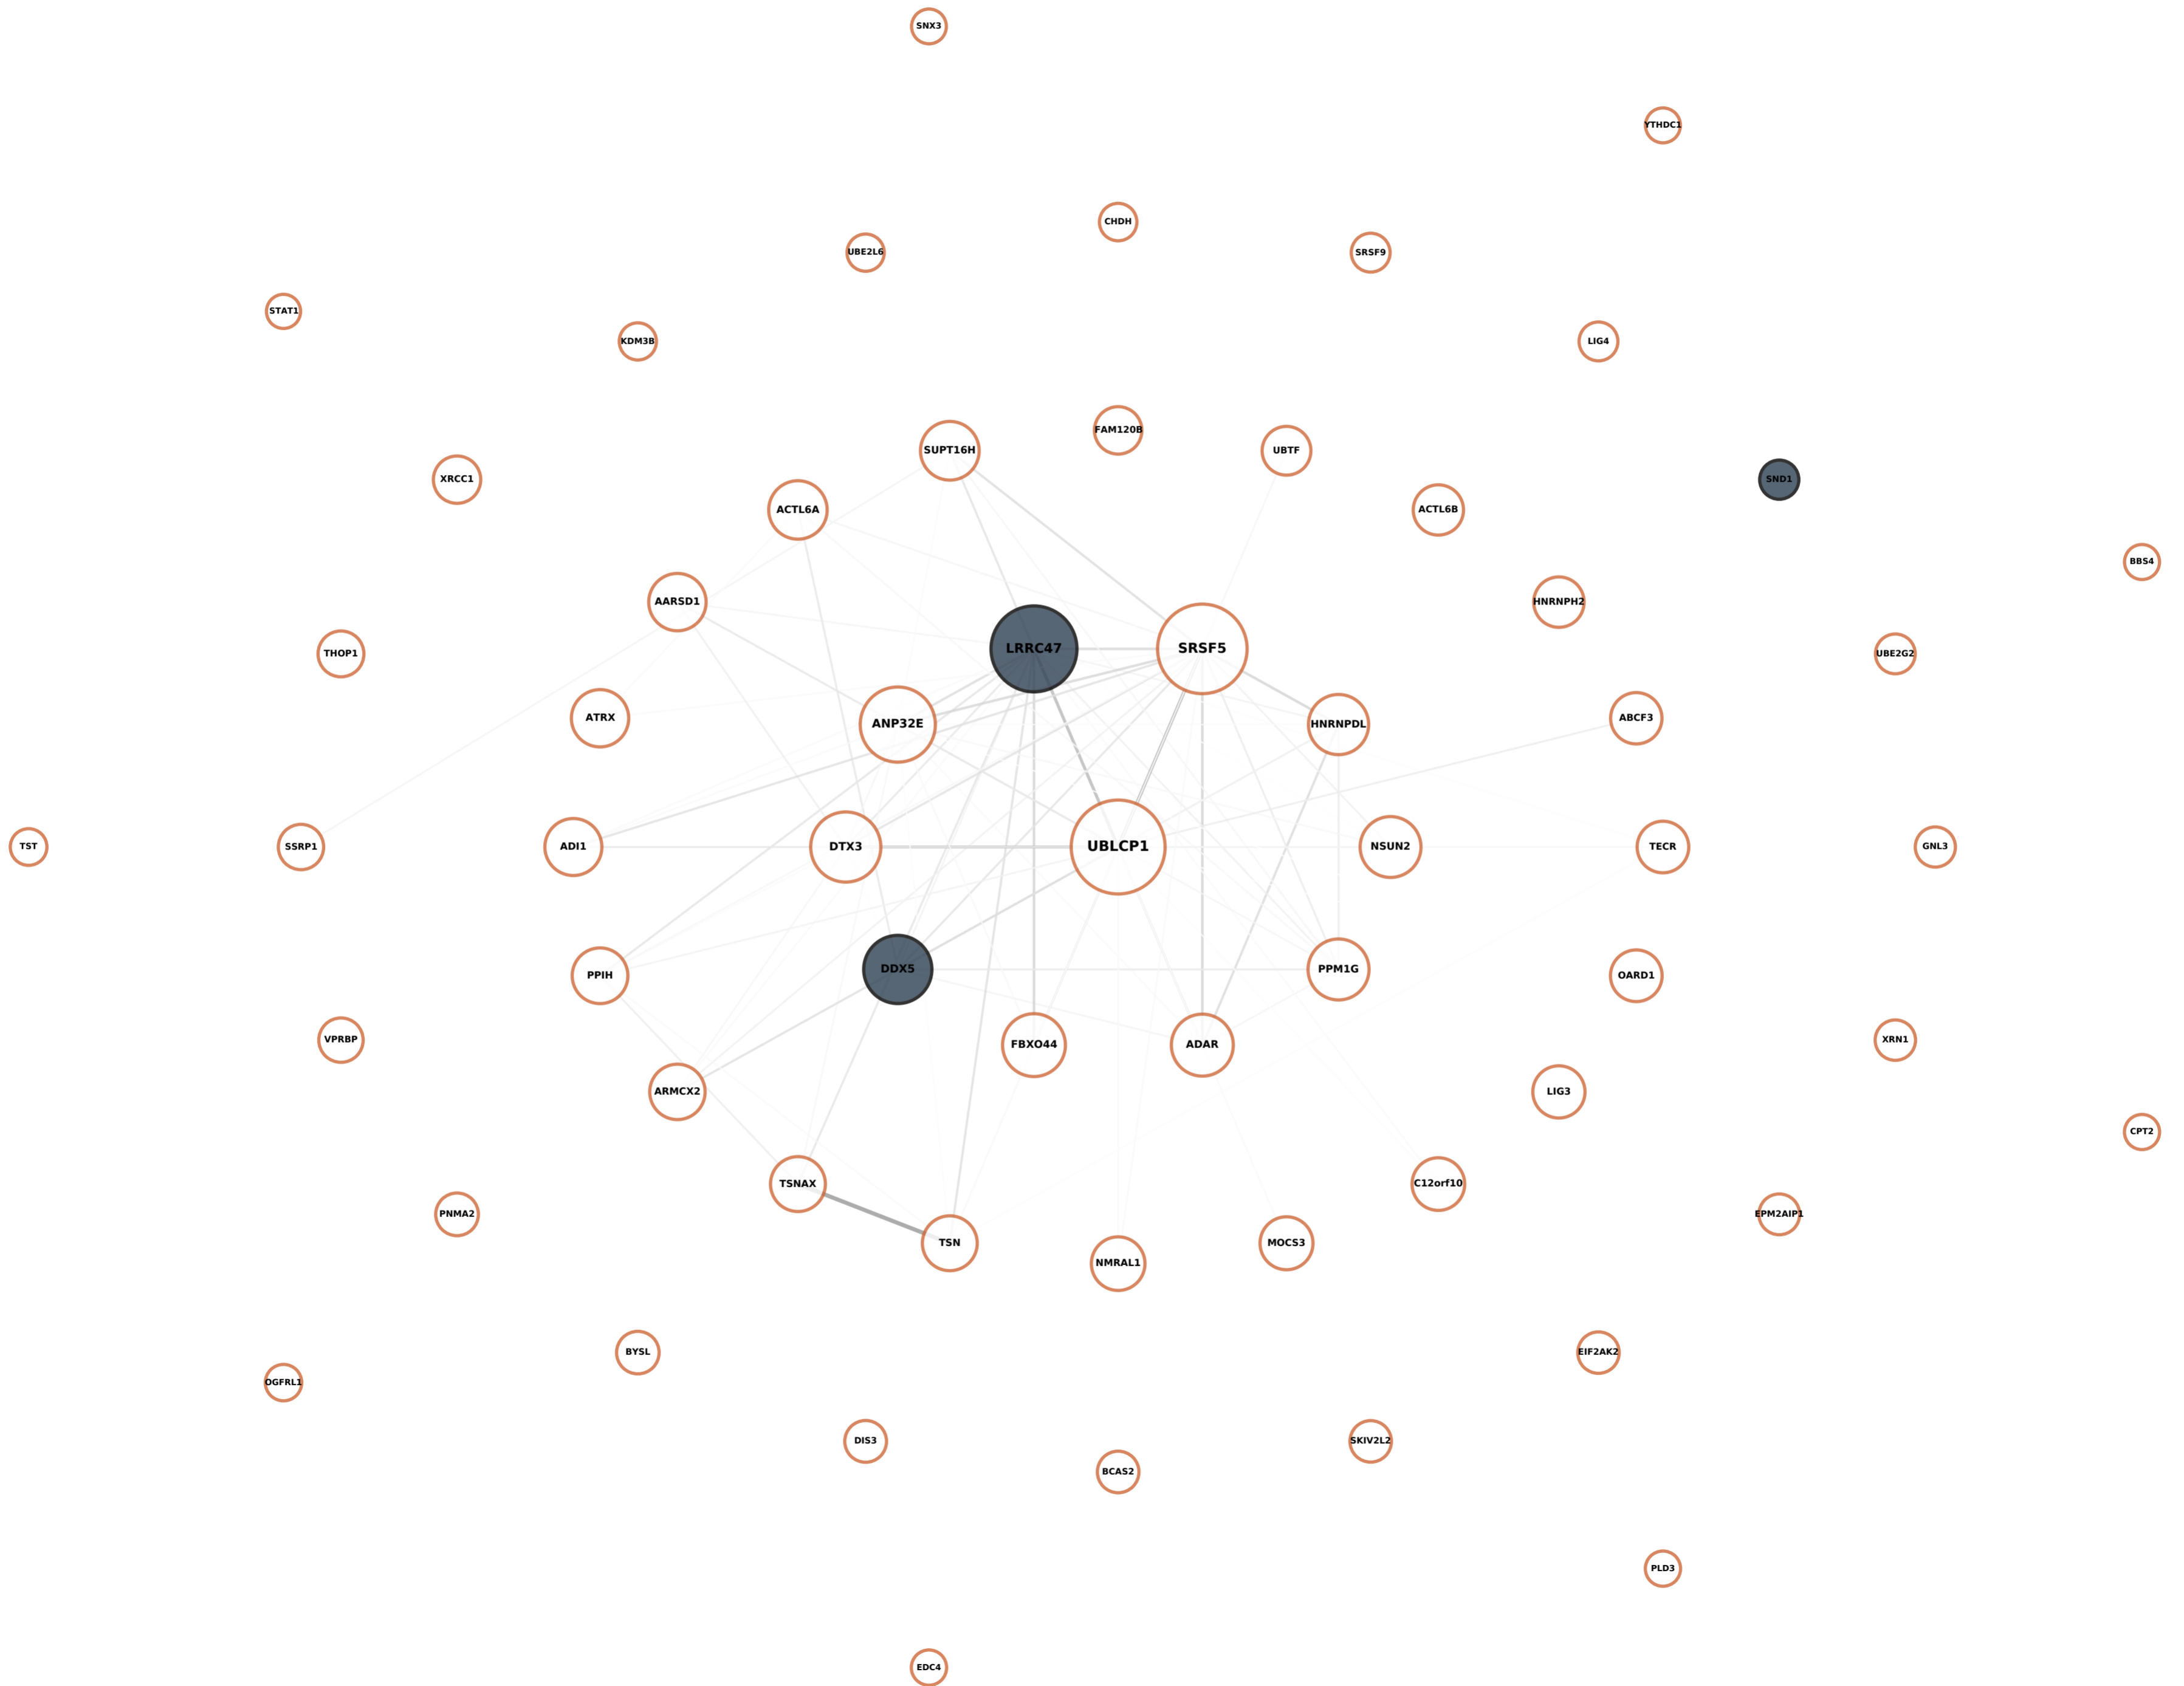



Module 36, n = 60,  
FDR Corrected pvalue 0.12774

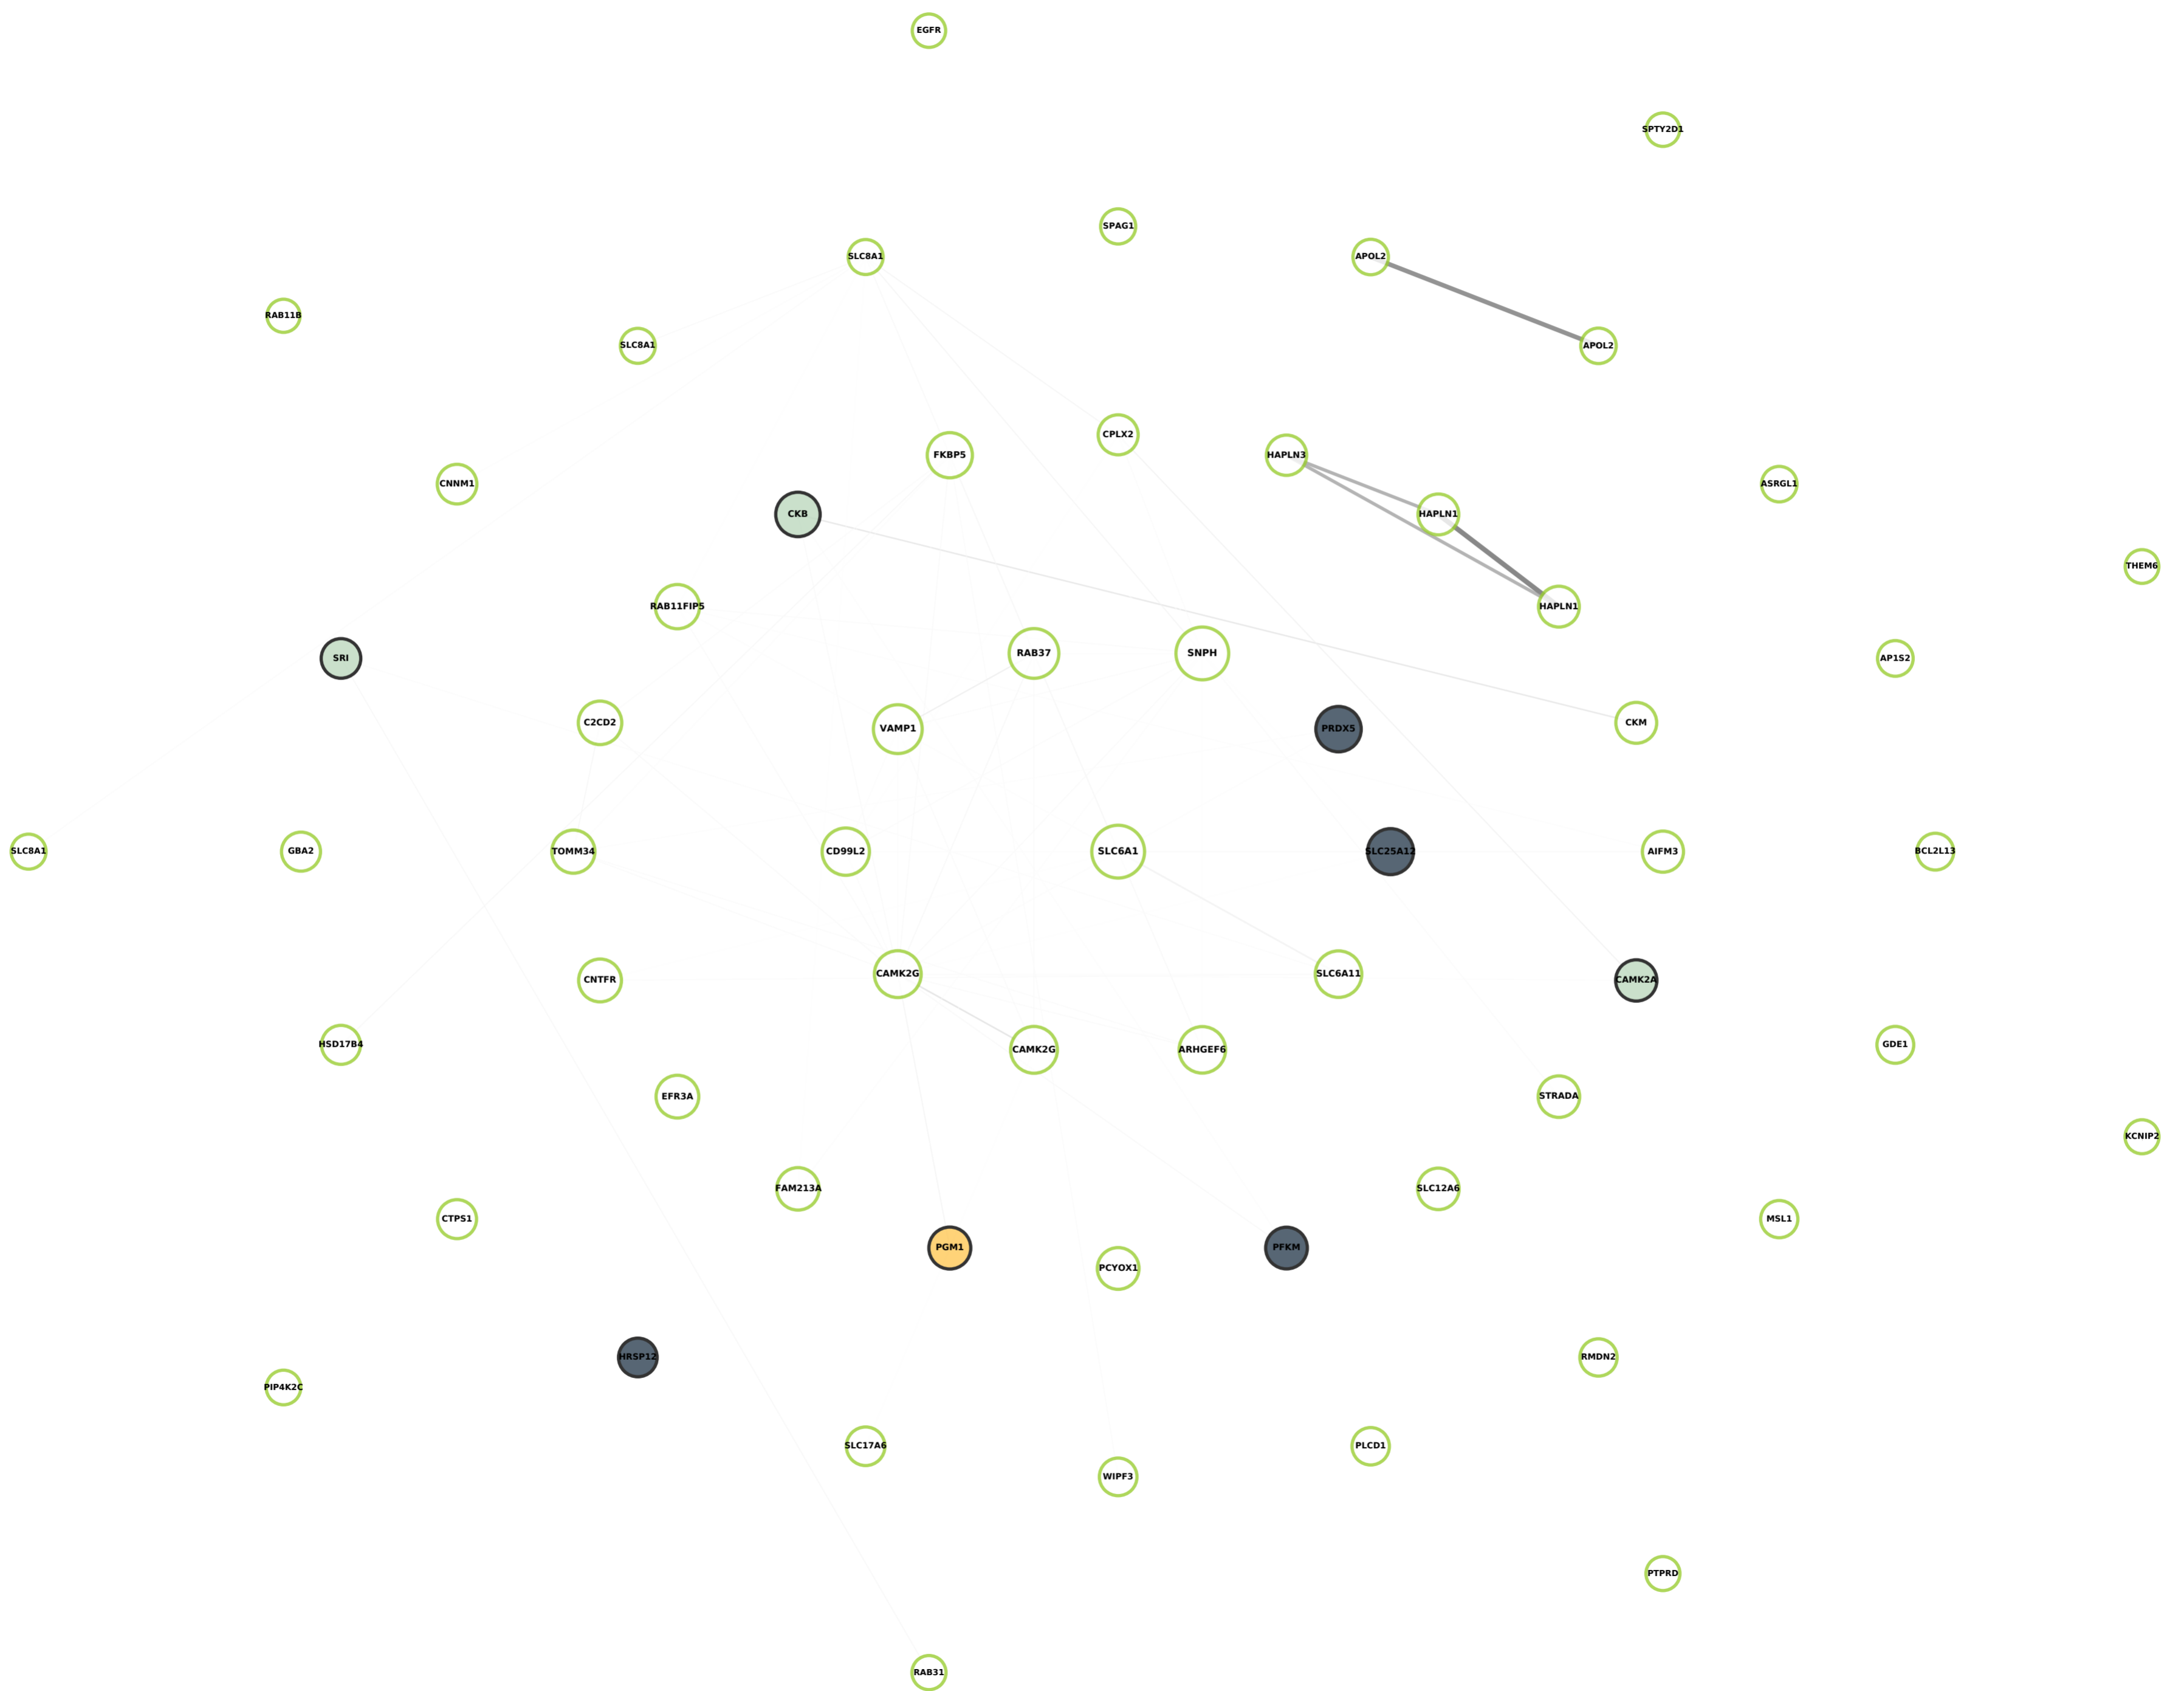

Module 37, n = 56,  
FDR Corrected pvalue 0.50737

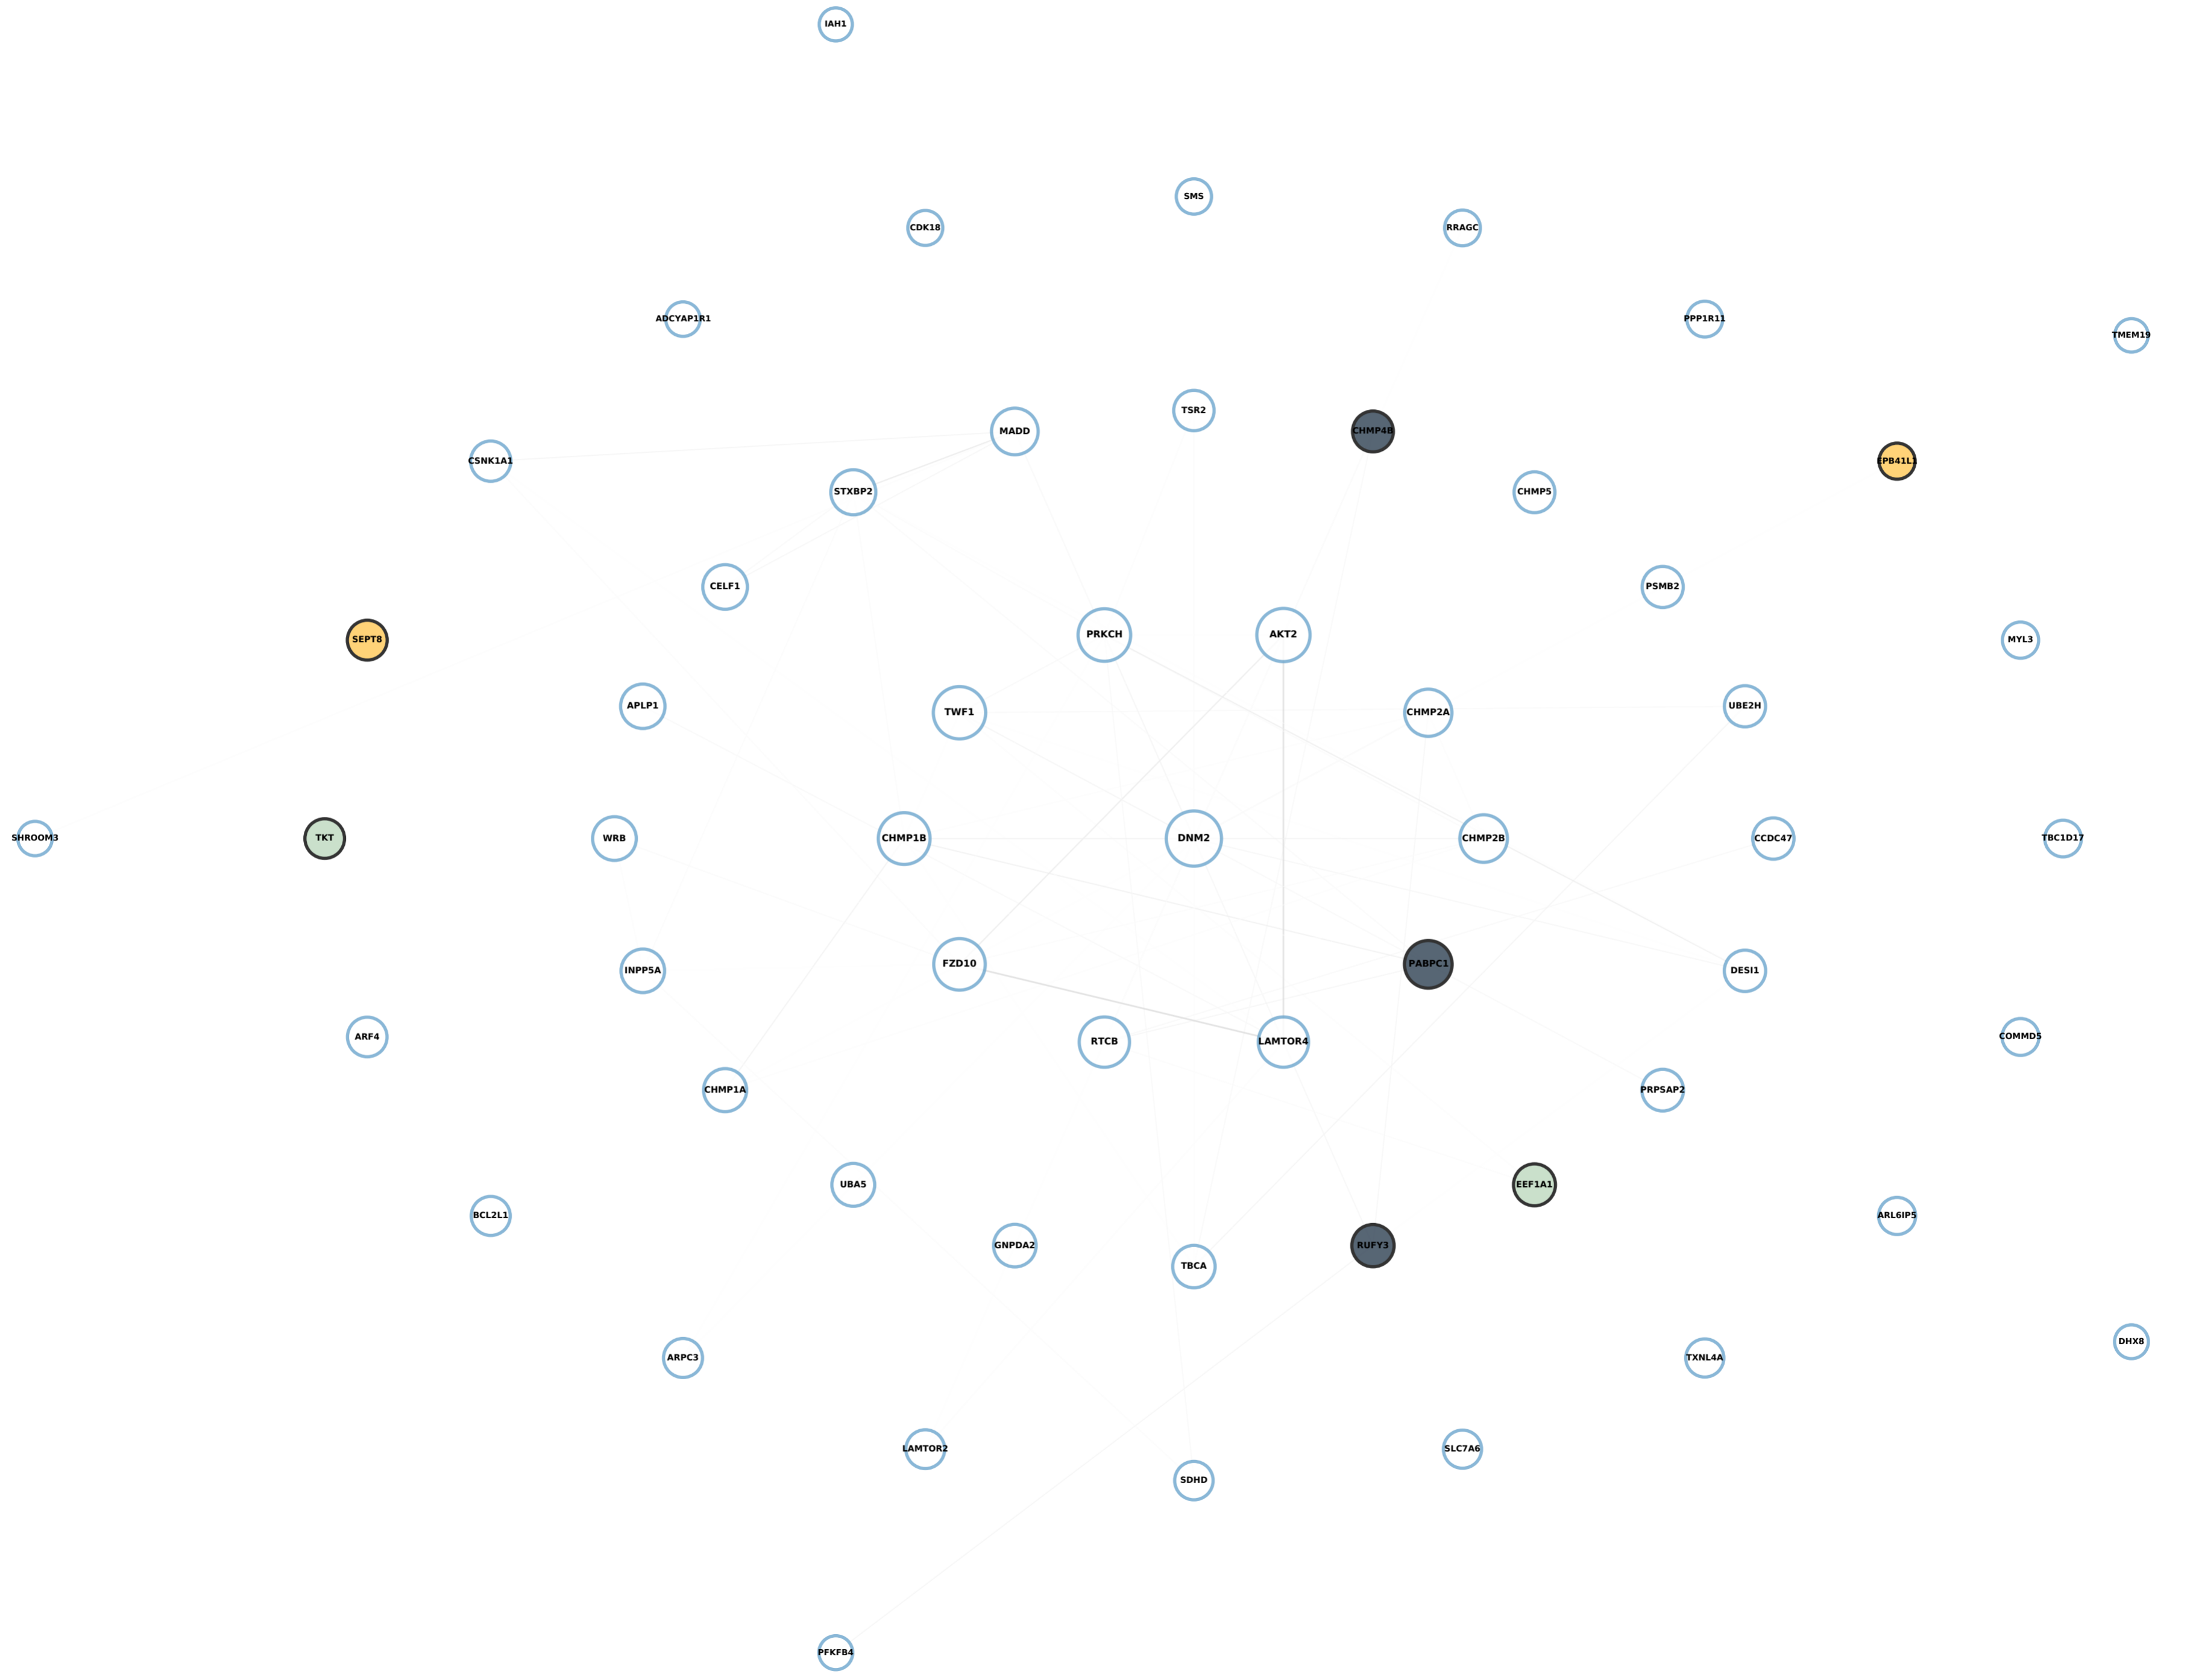



Module 38, n = 53,  
FDR Corrected pvalue 0.00025693

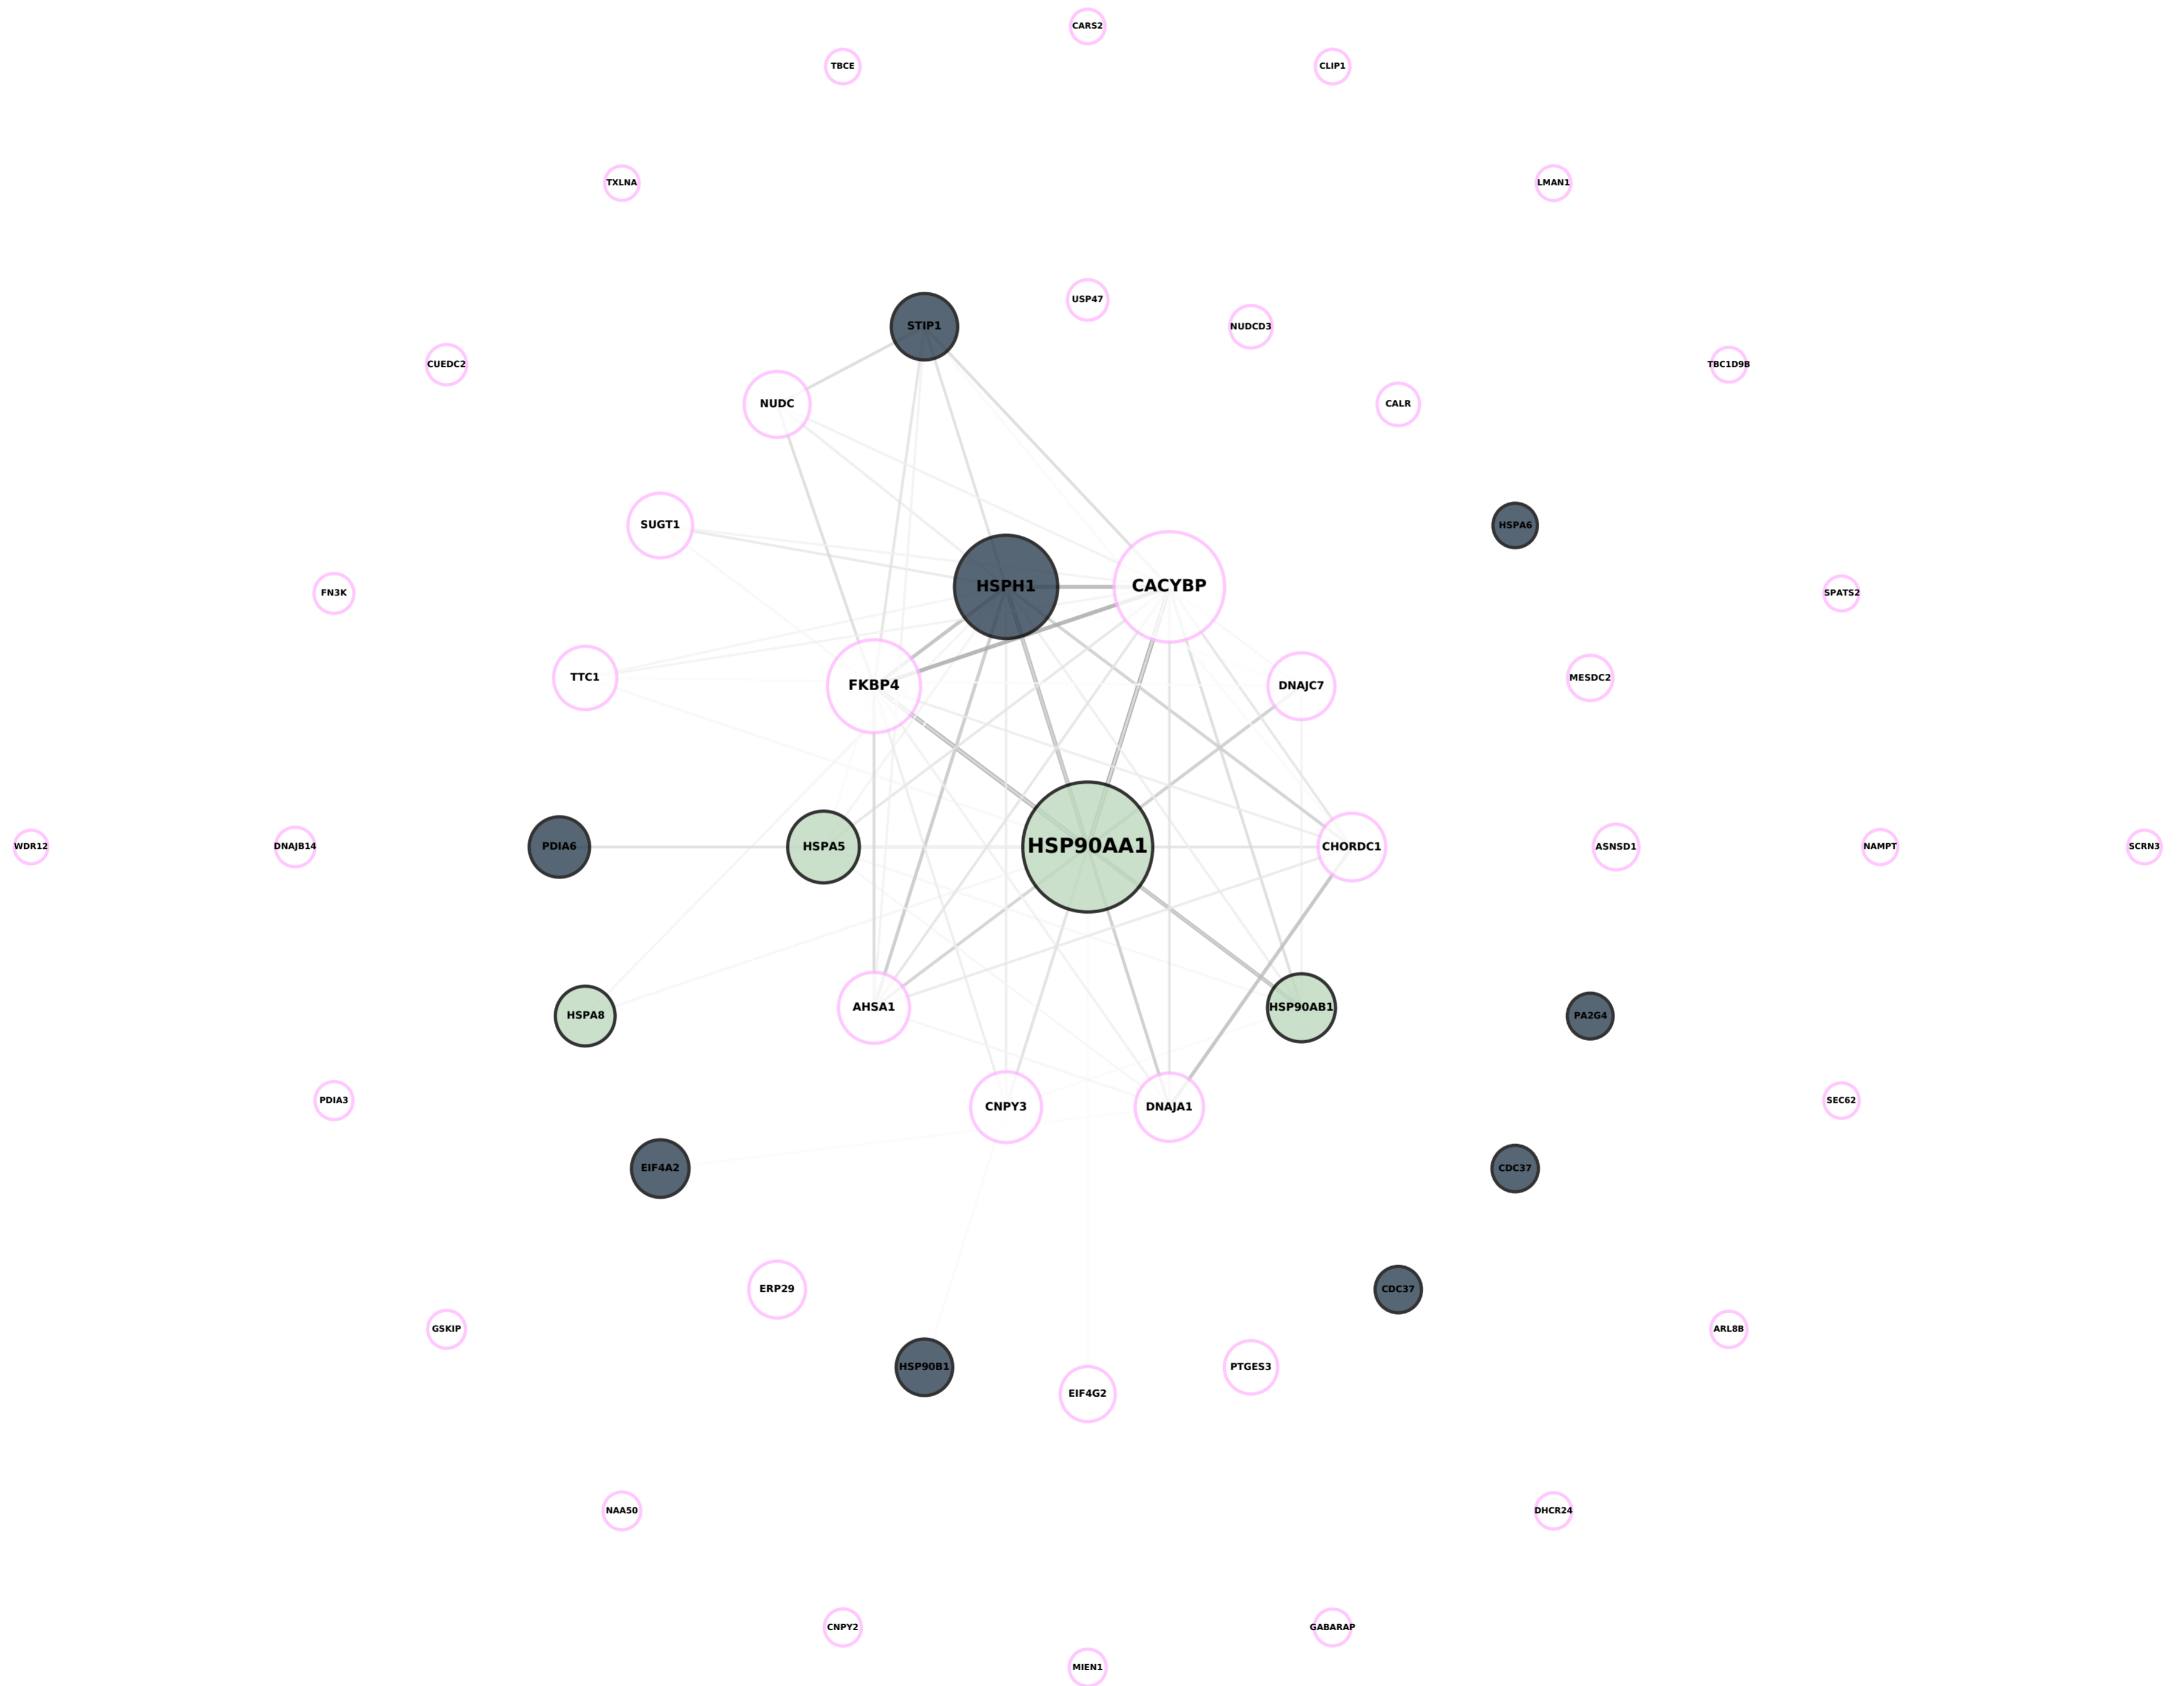

Module 39, n = 48,  
FDR Corrected pvalue 0.96802

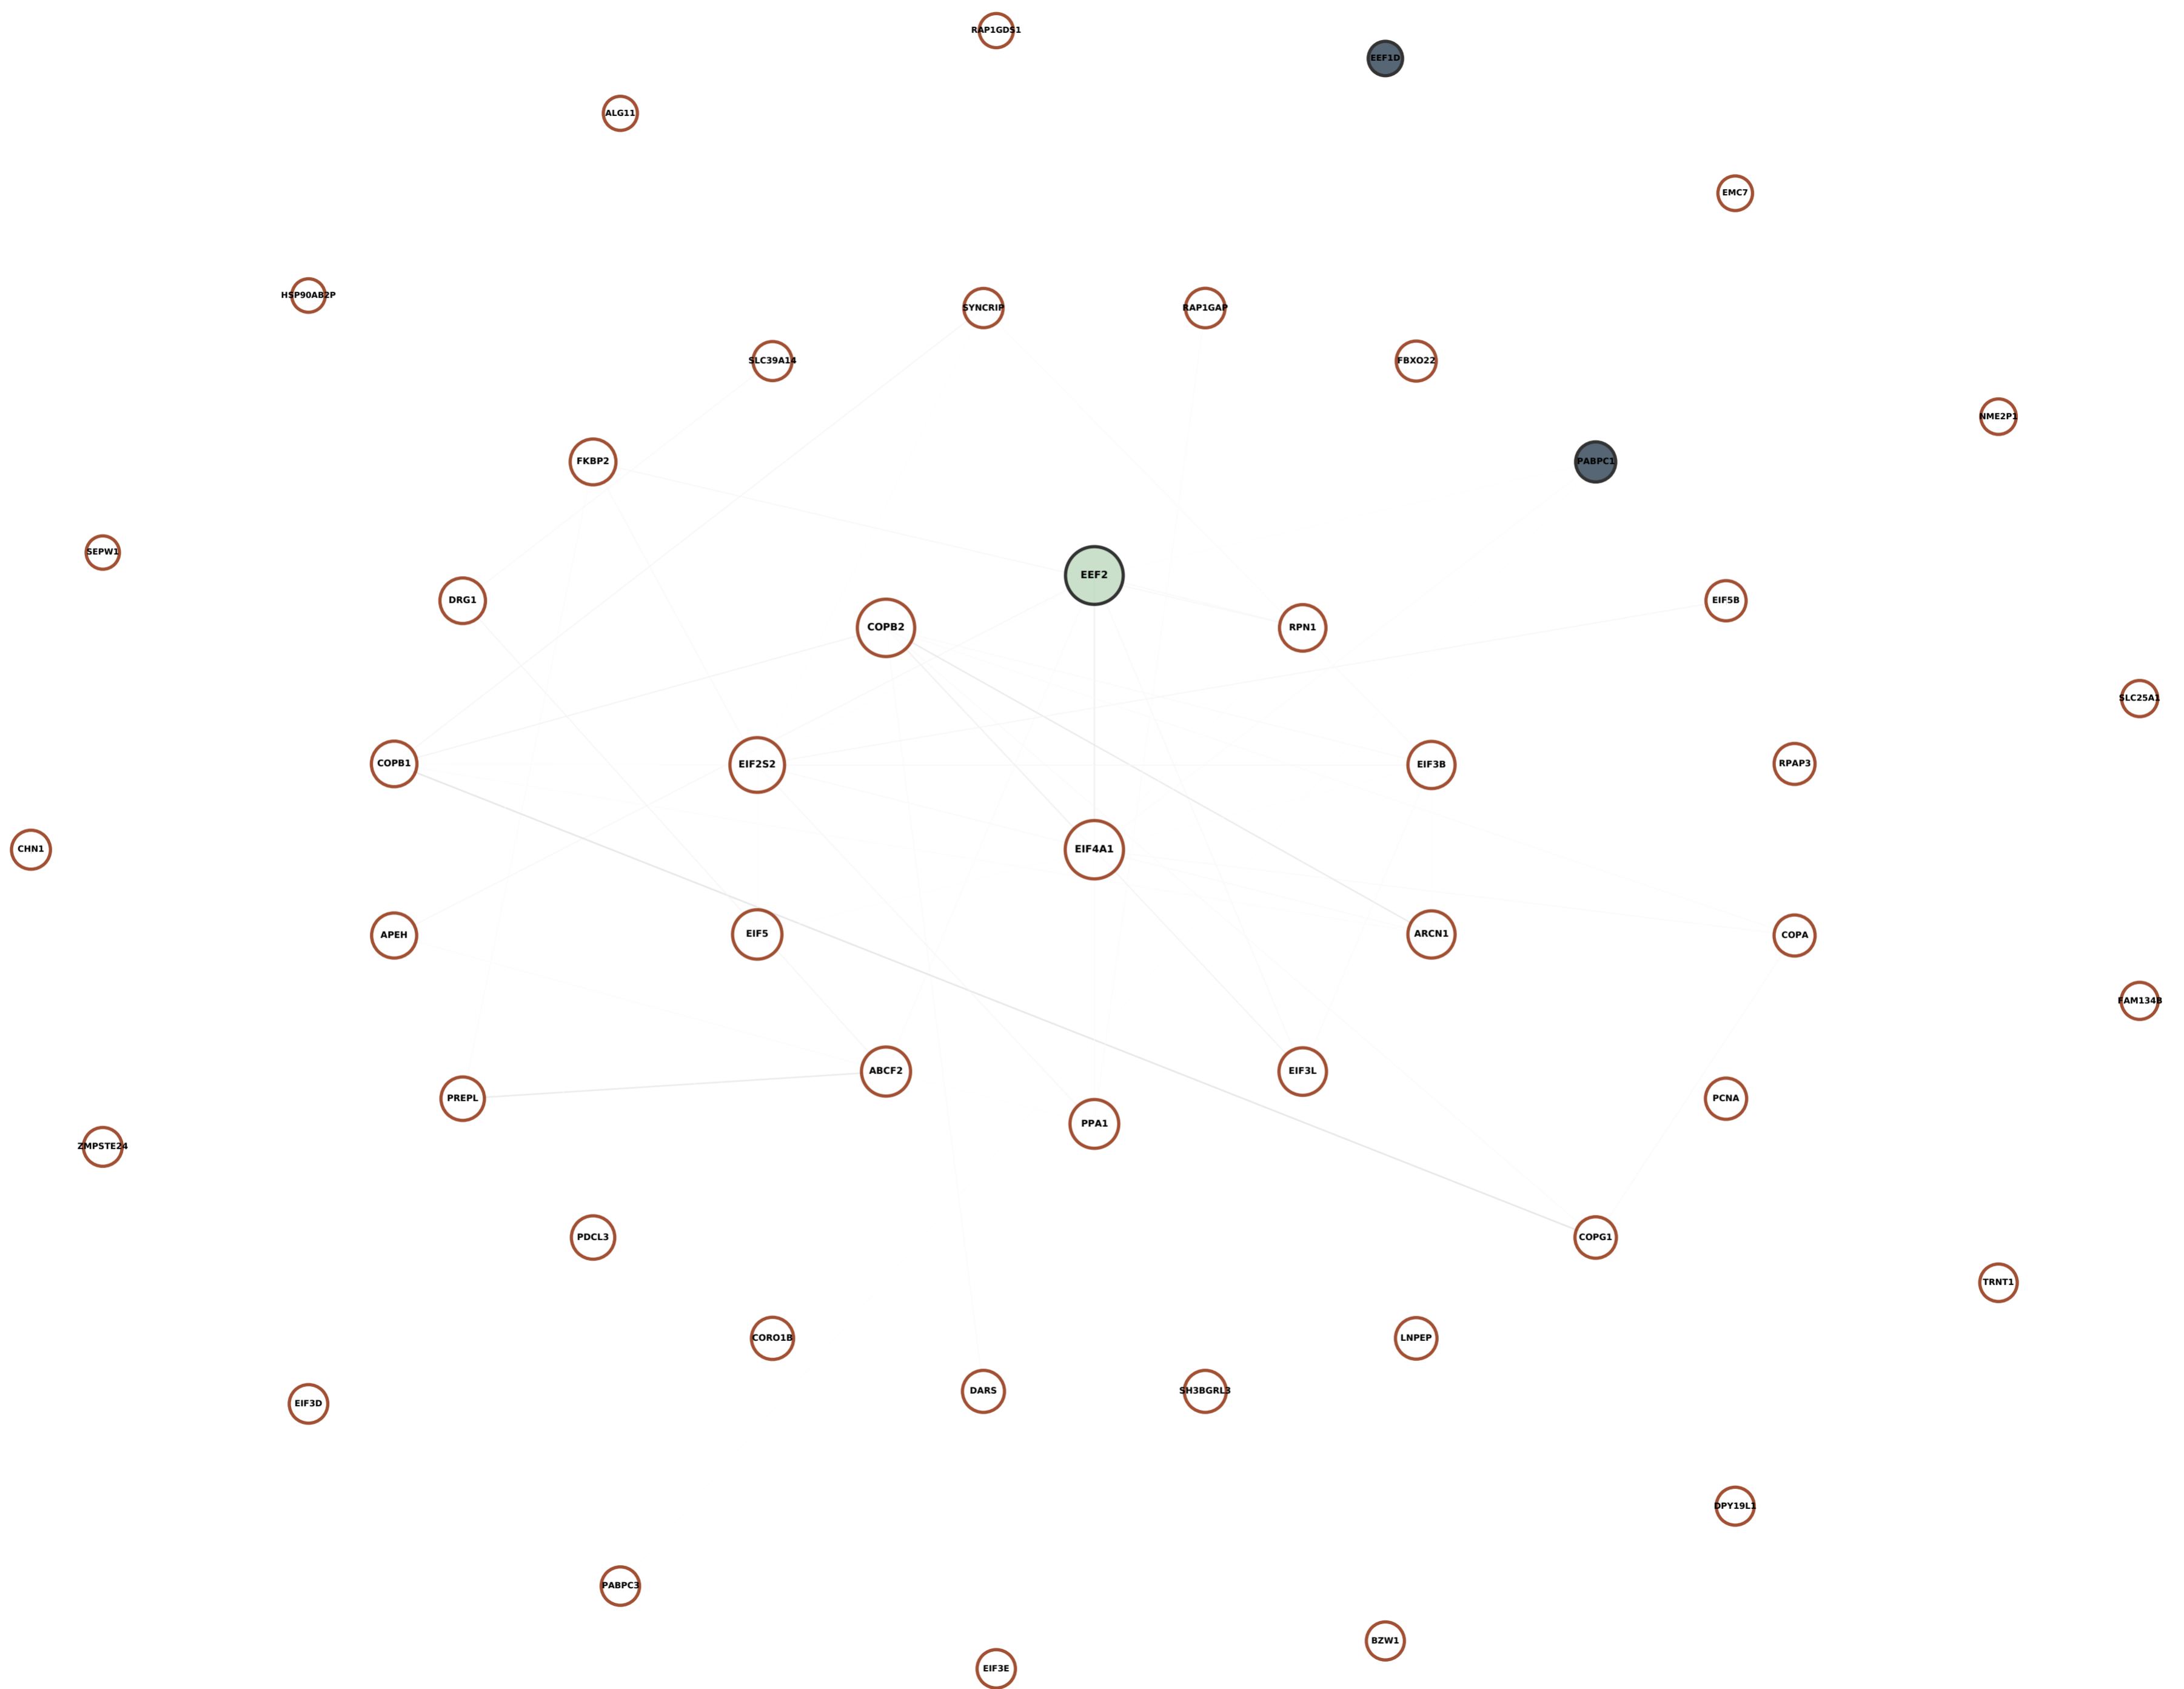





Module 41, n = 37,  
FDR Corrected pvalue 0.0064004

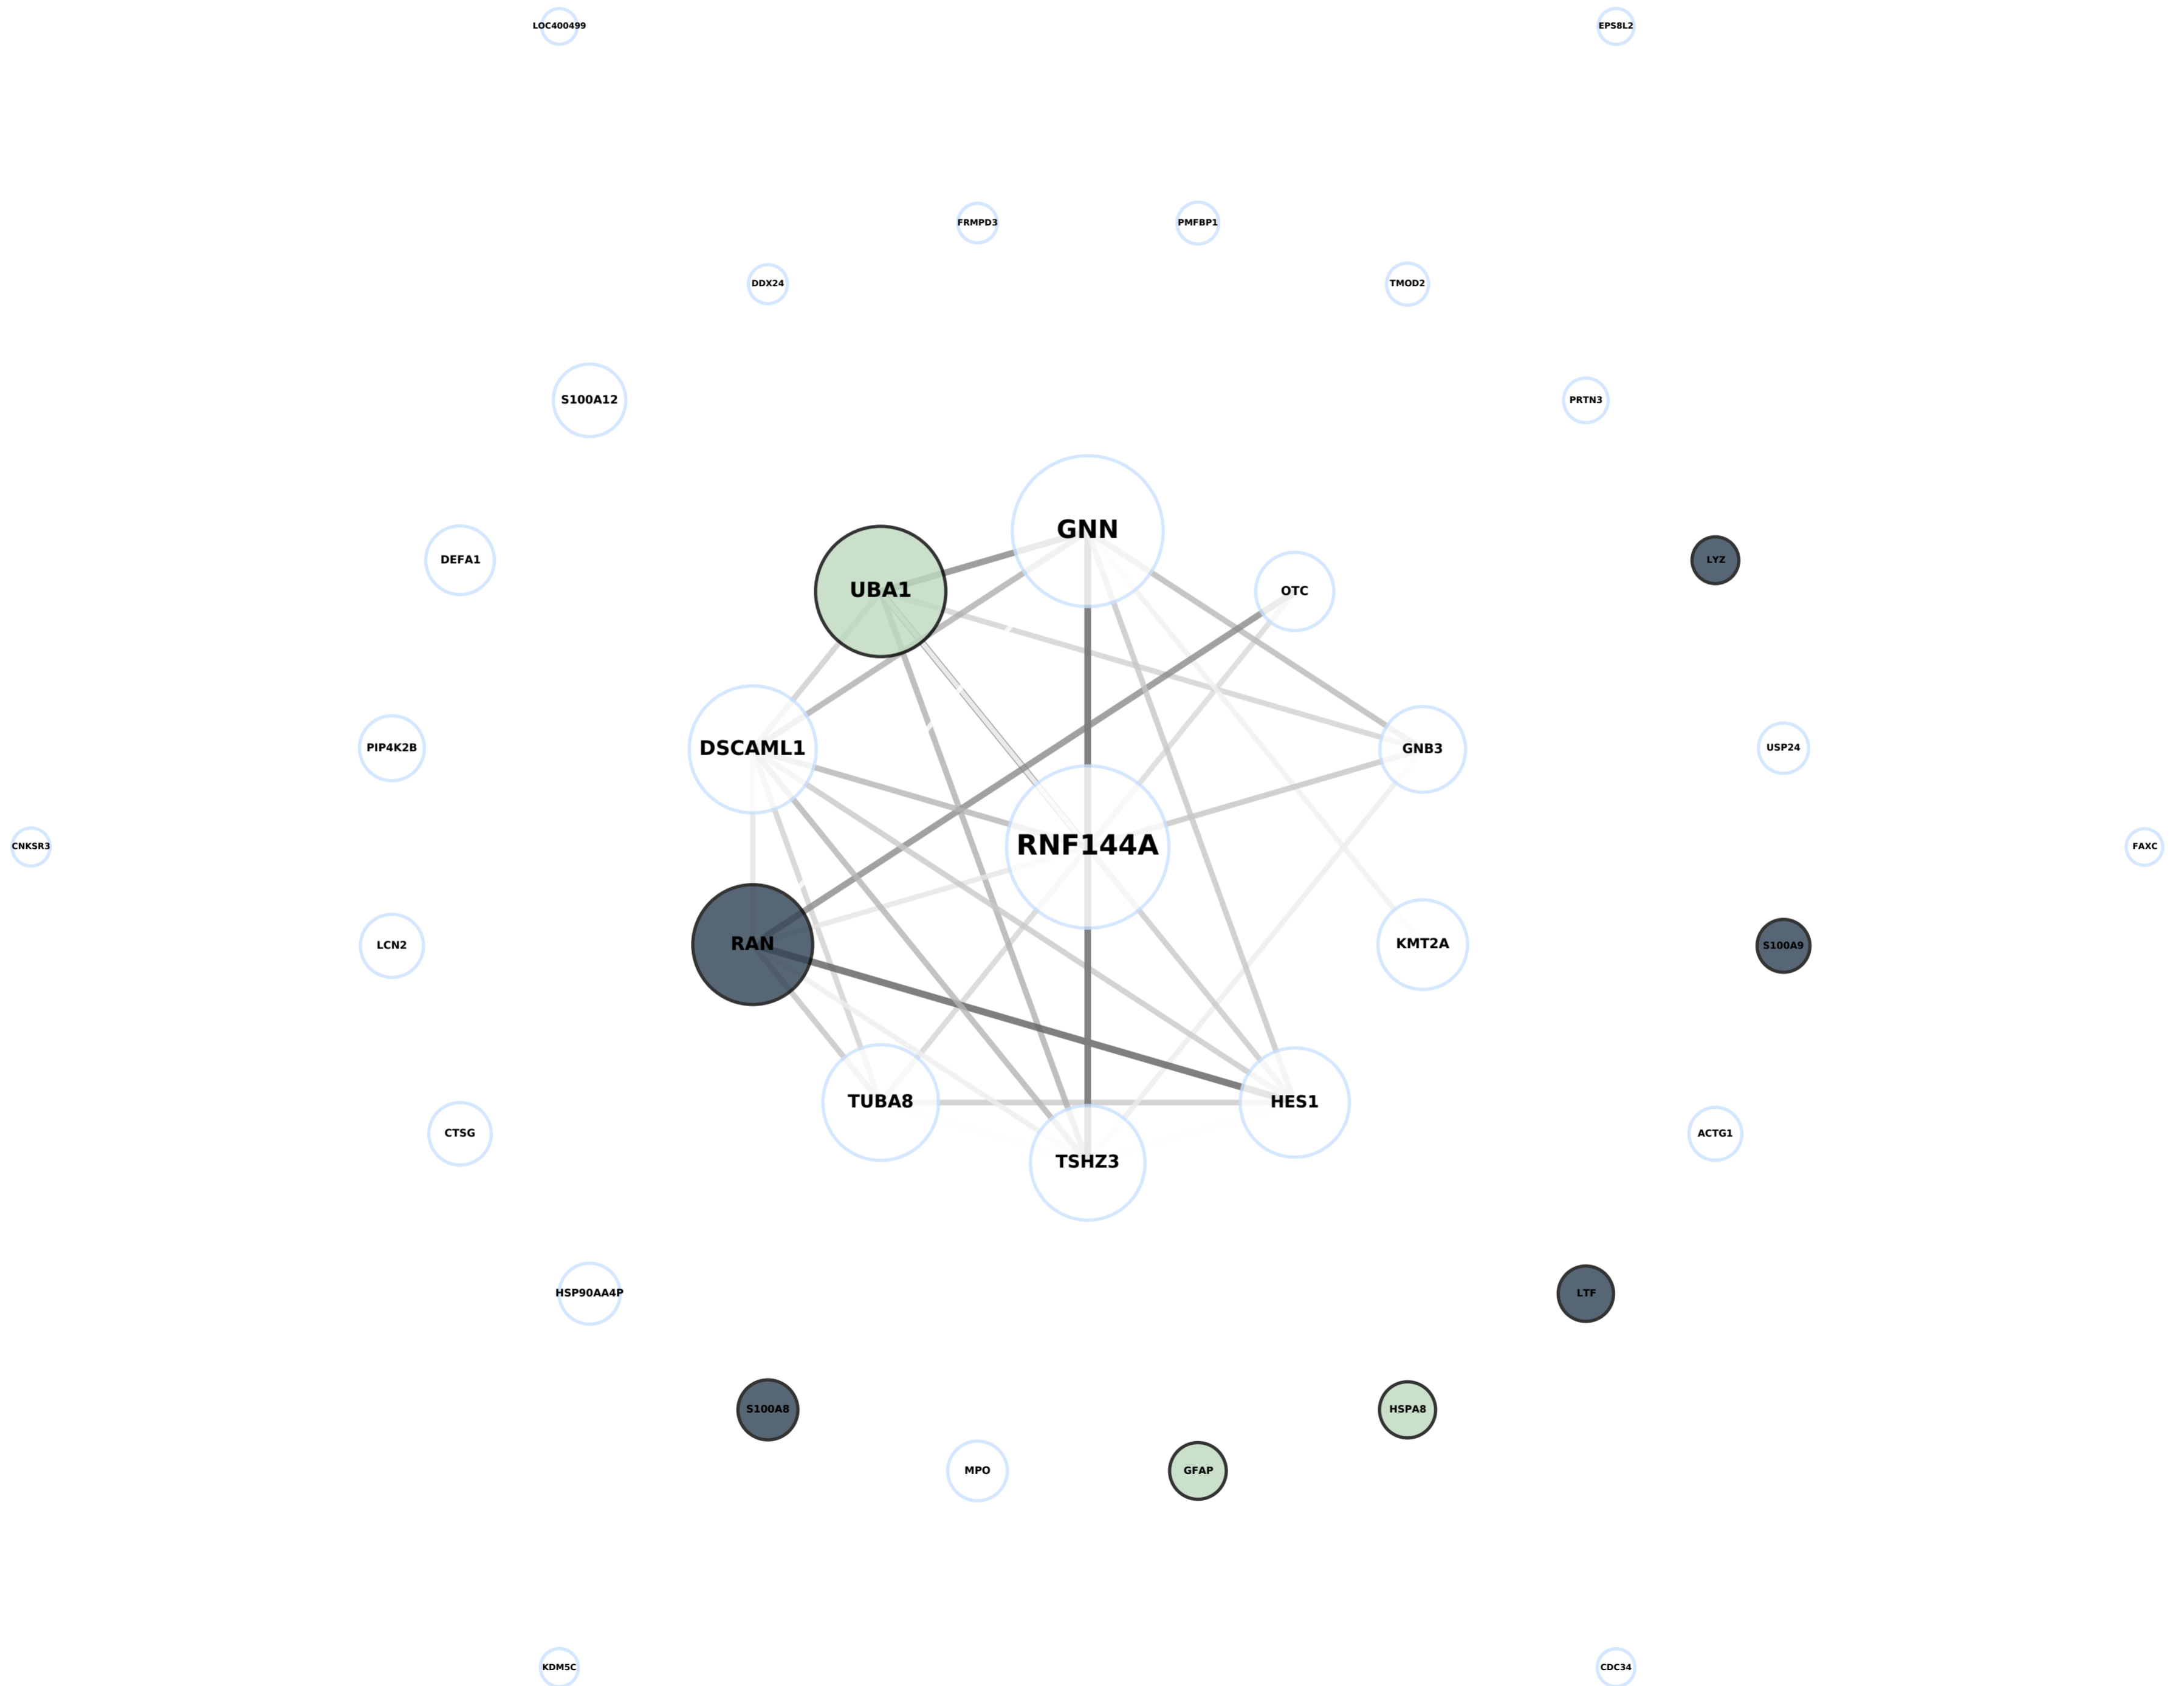



Module 42, n = 32,  
FDR Corrected pvalue 1

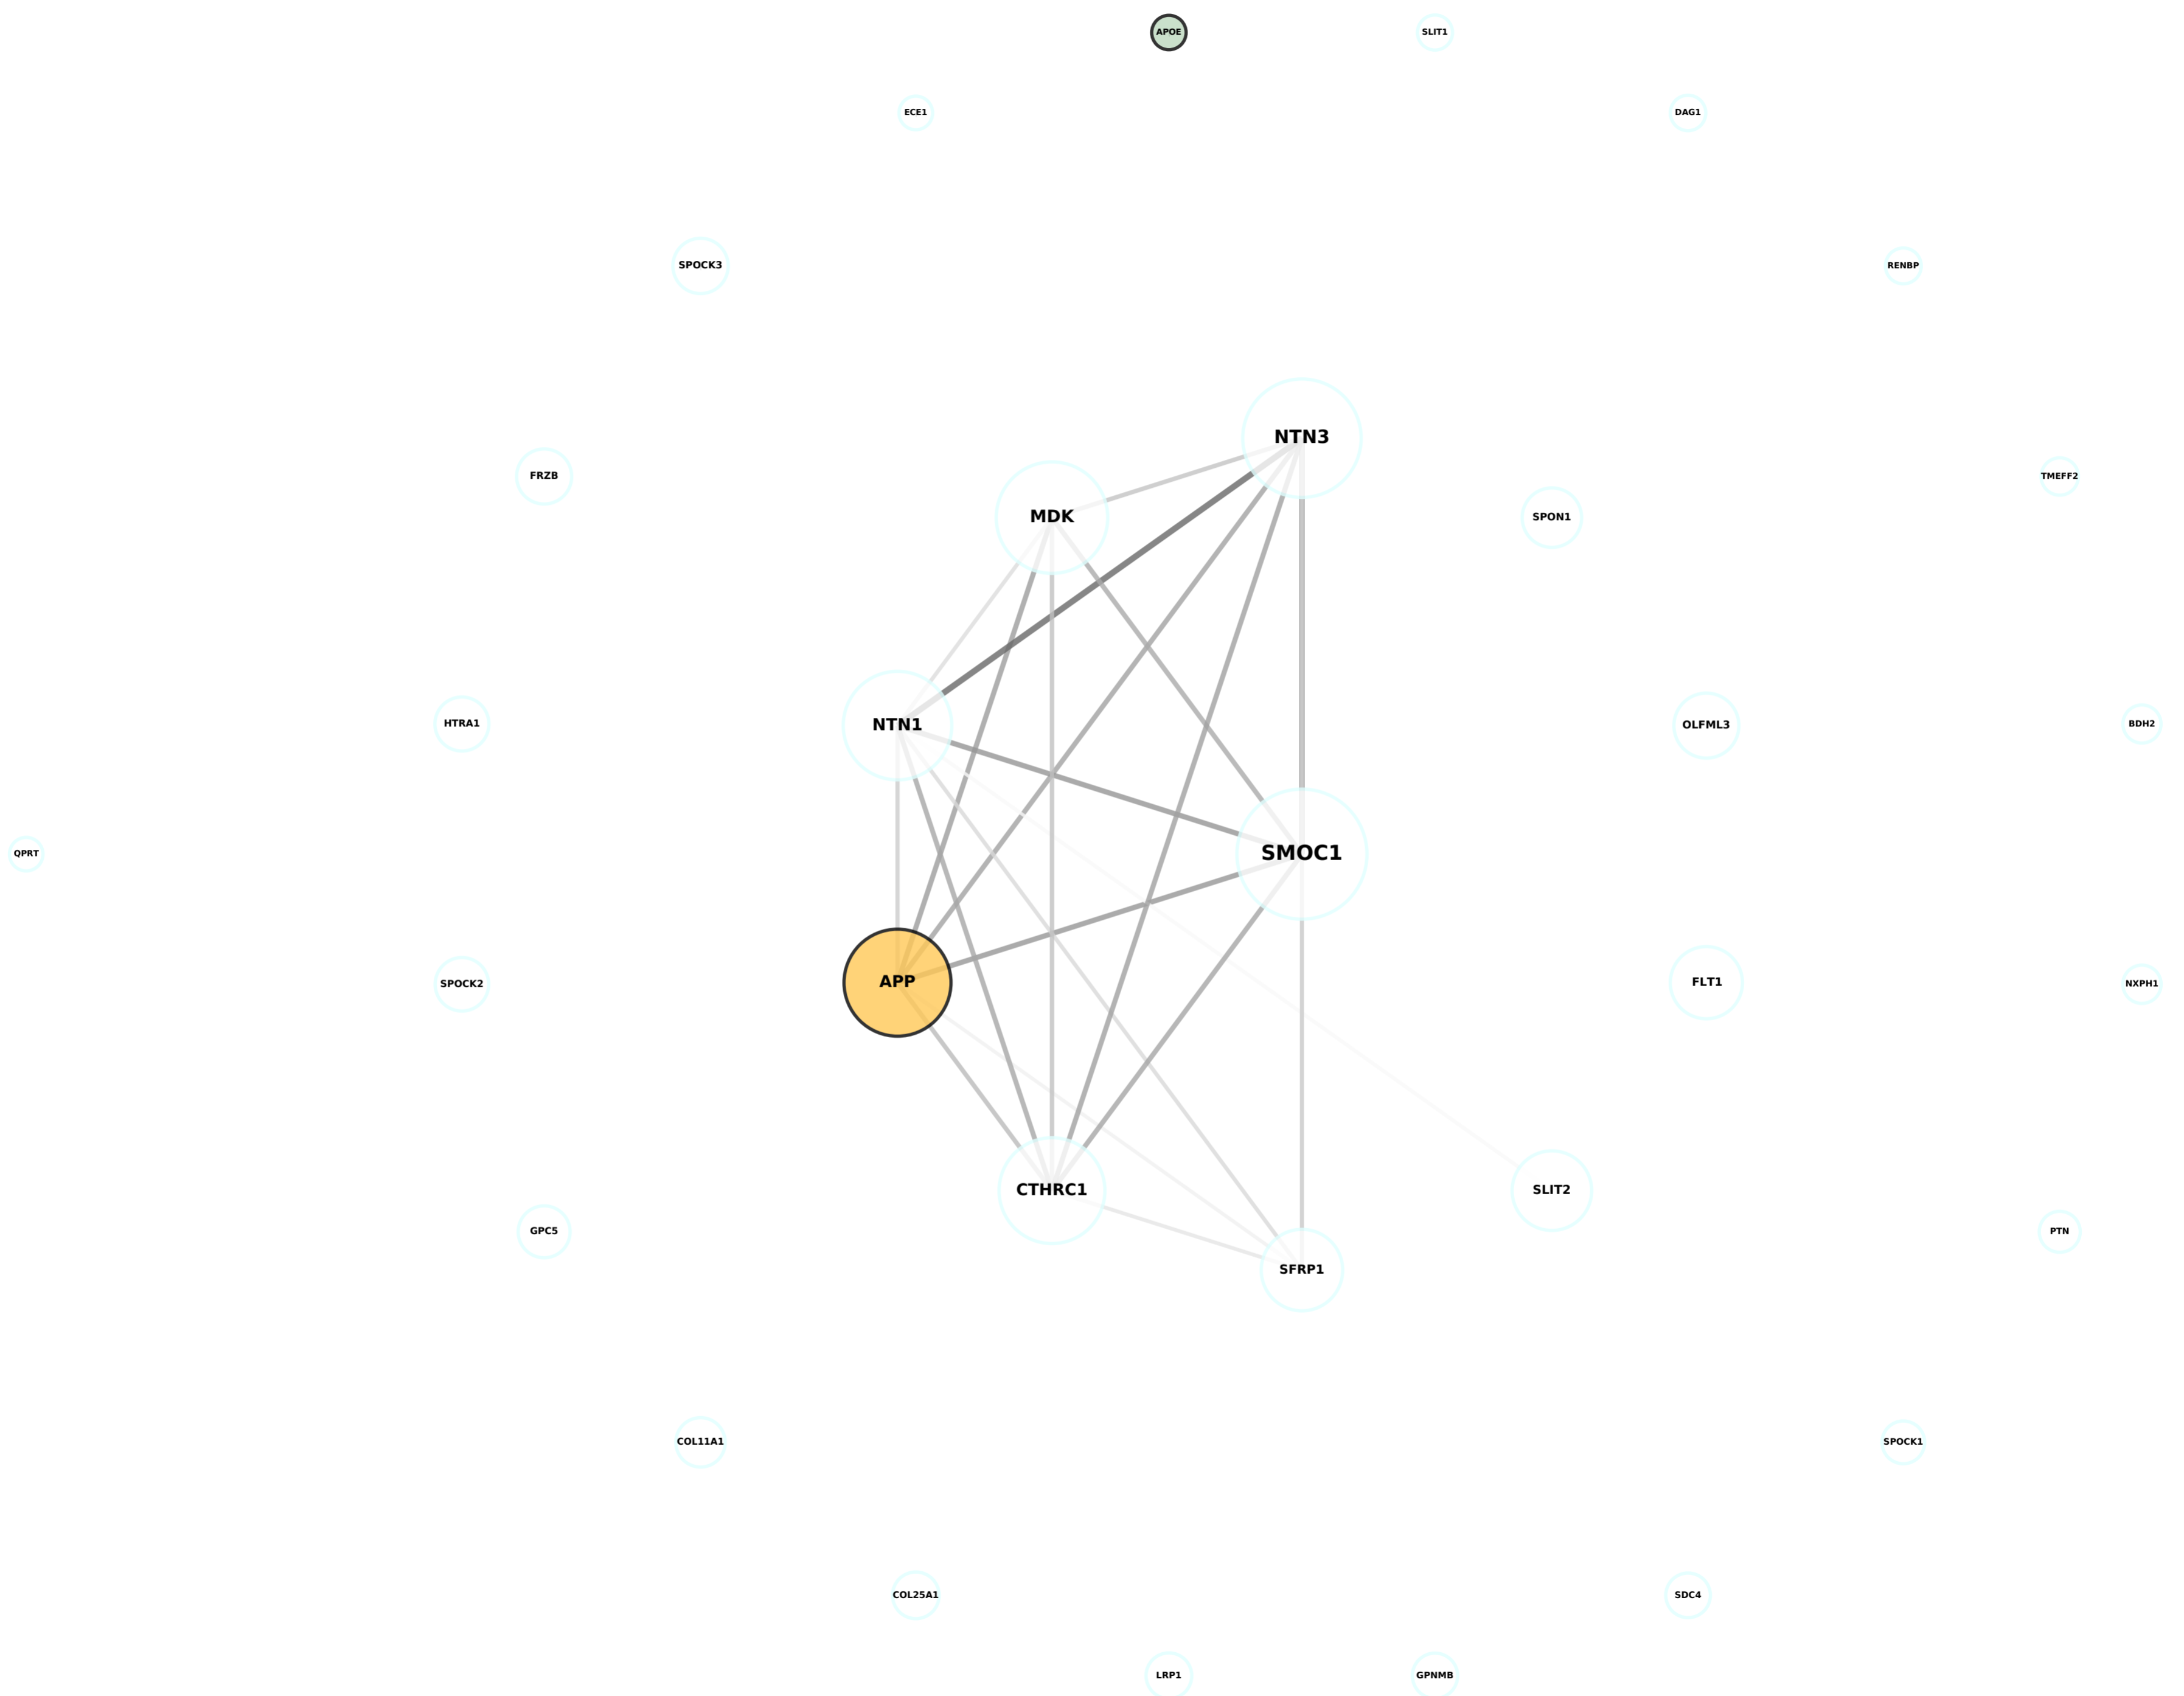

**Module 43, n = 30,  
FDR Corrected pvalue 0.54857**

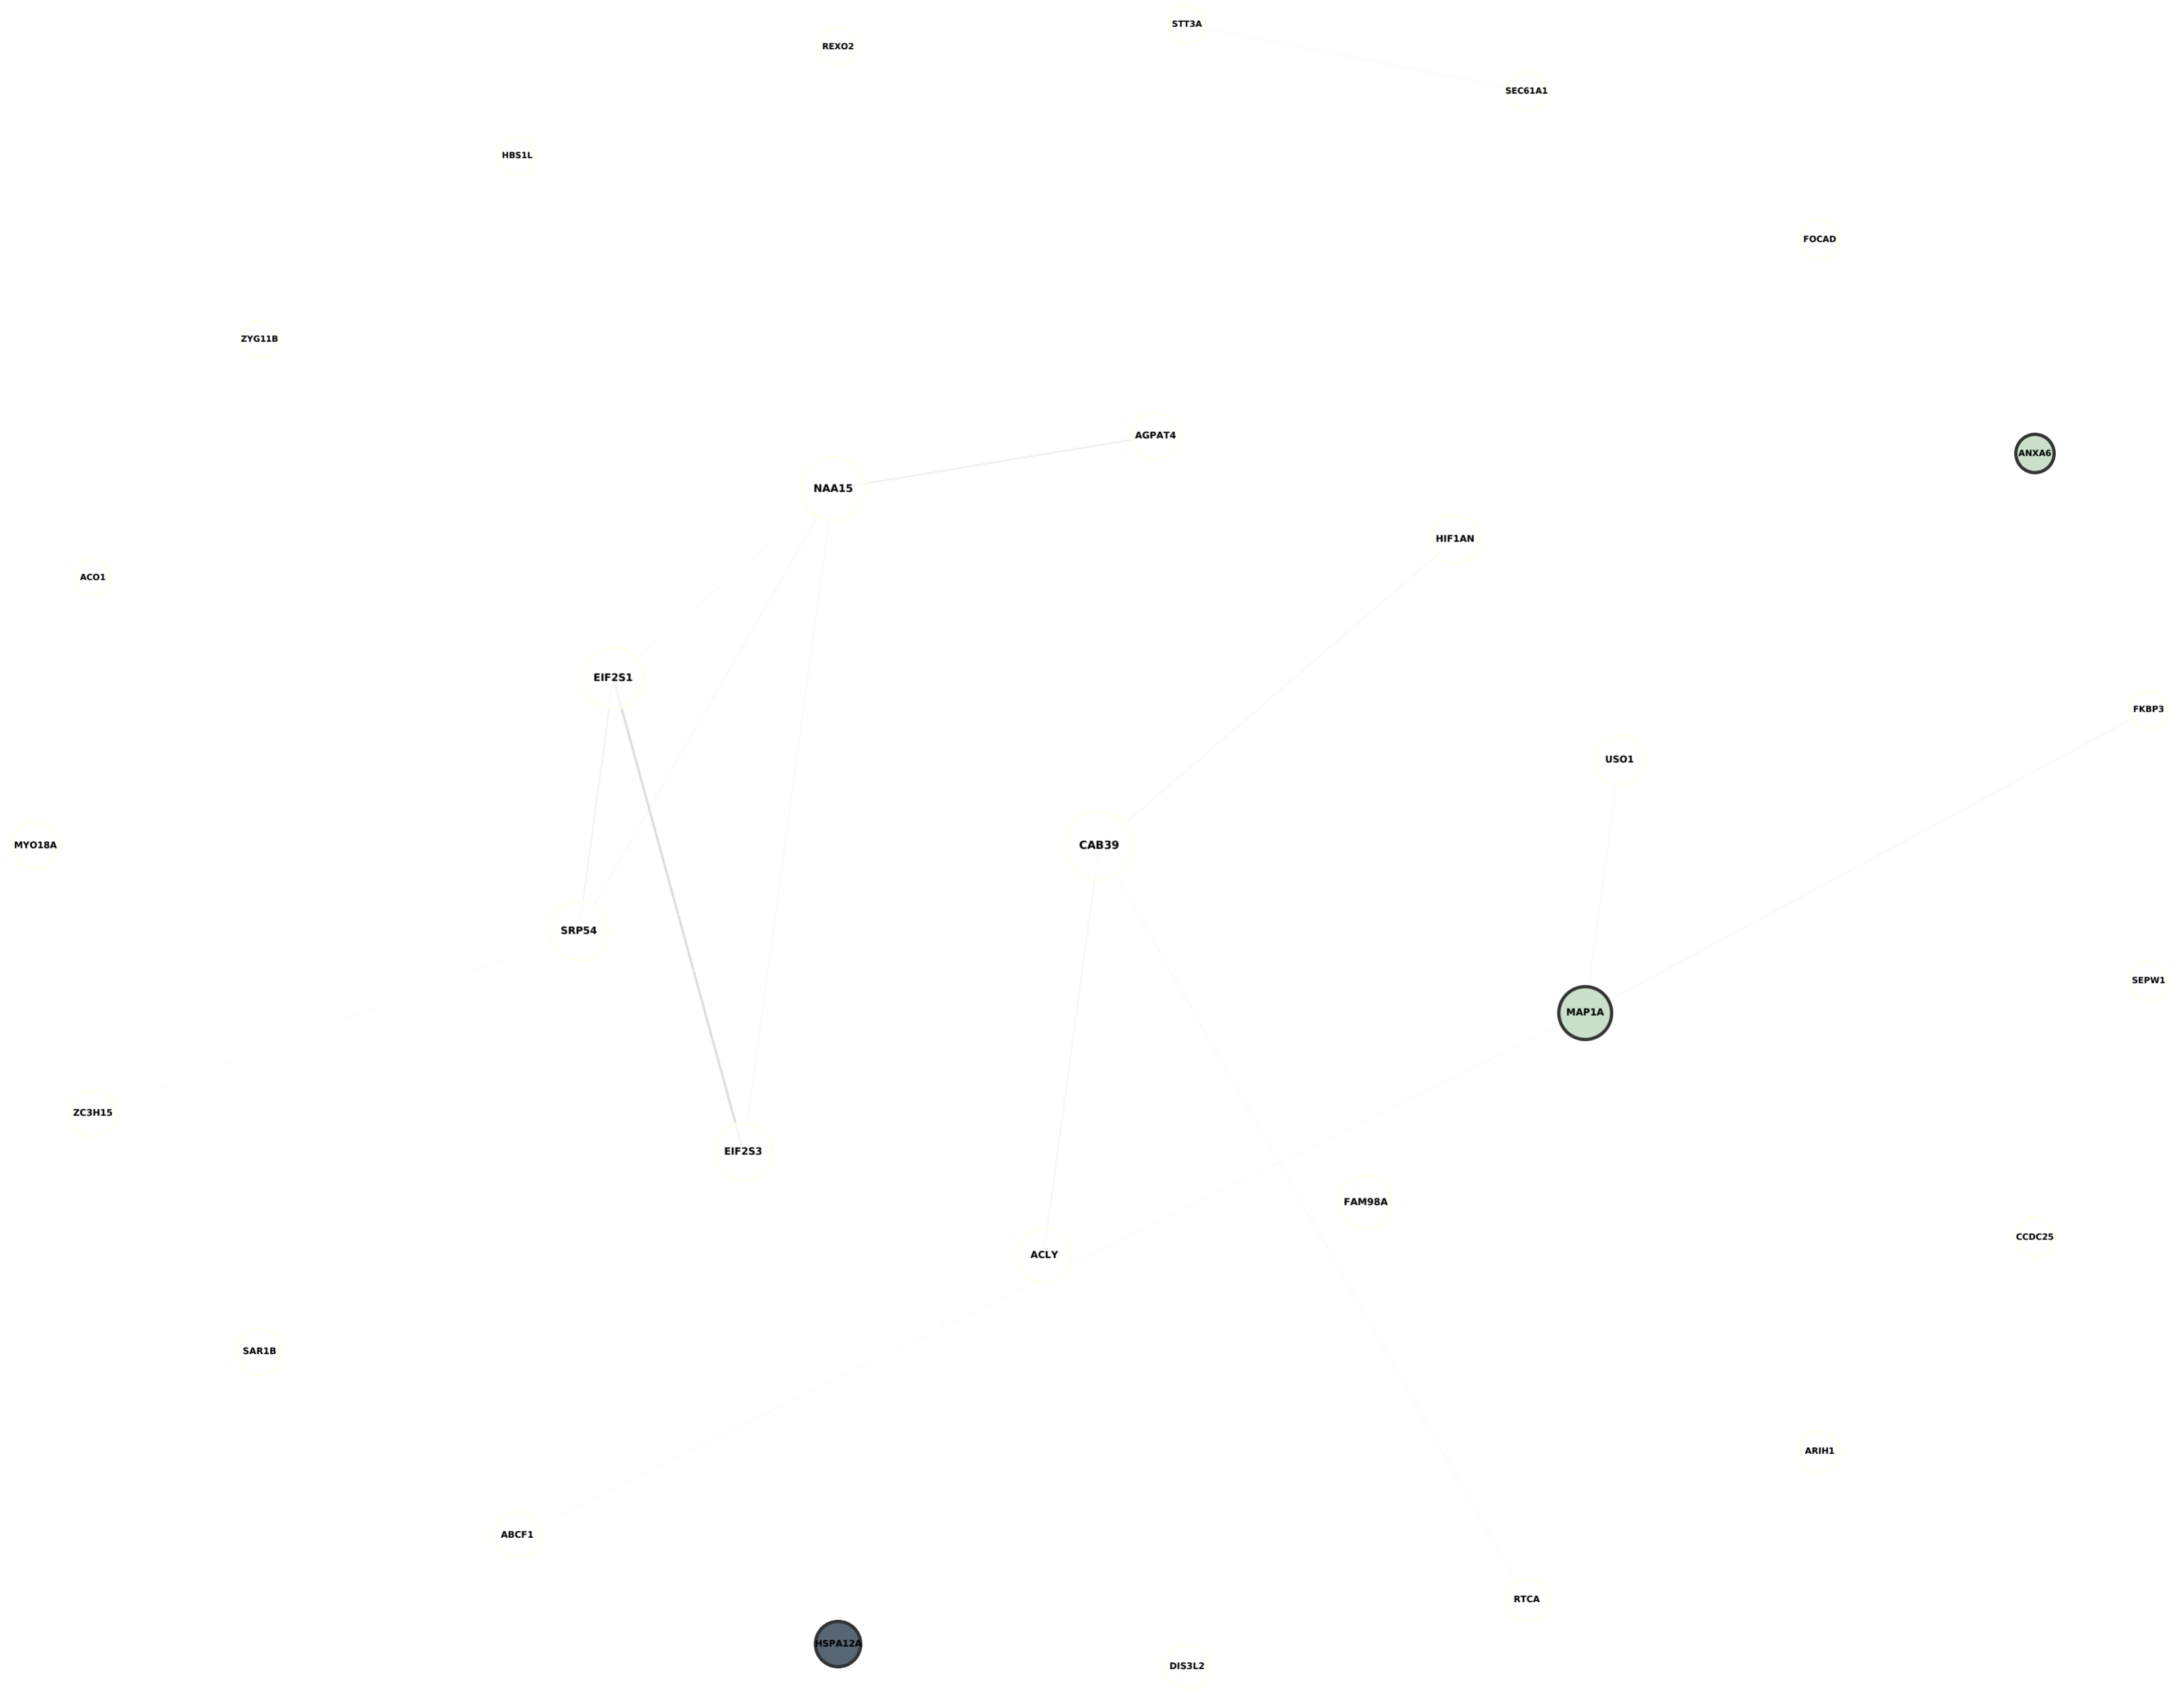



Module 44, n = 28,  
FDR Corrected pvalue 2.3129e-06

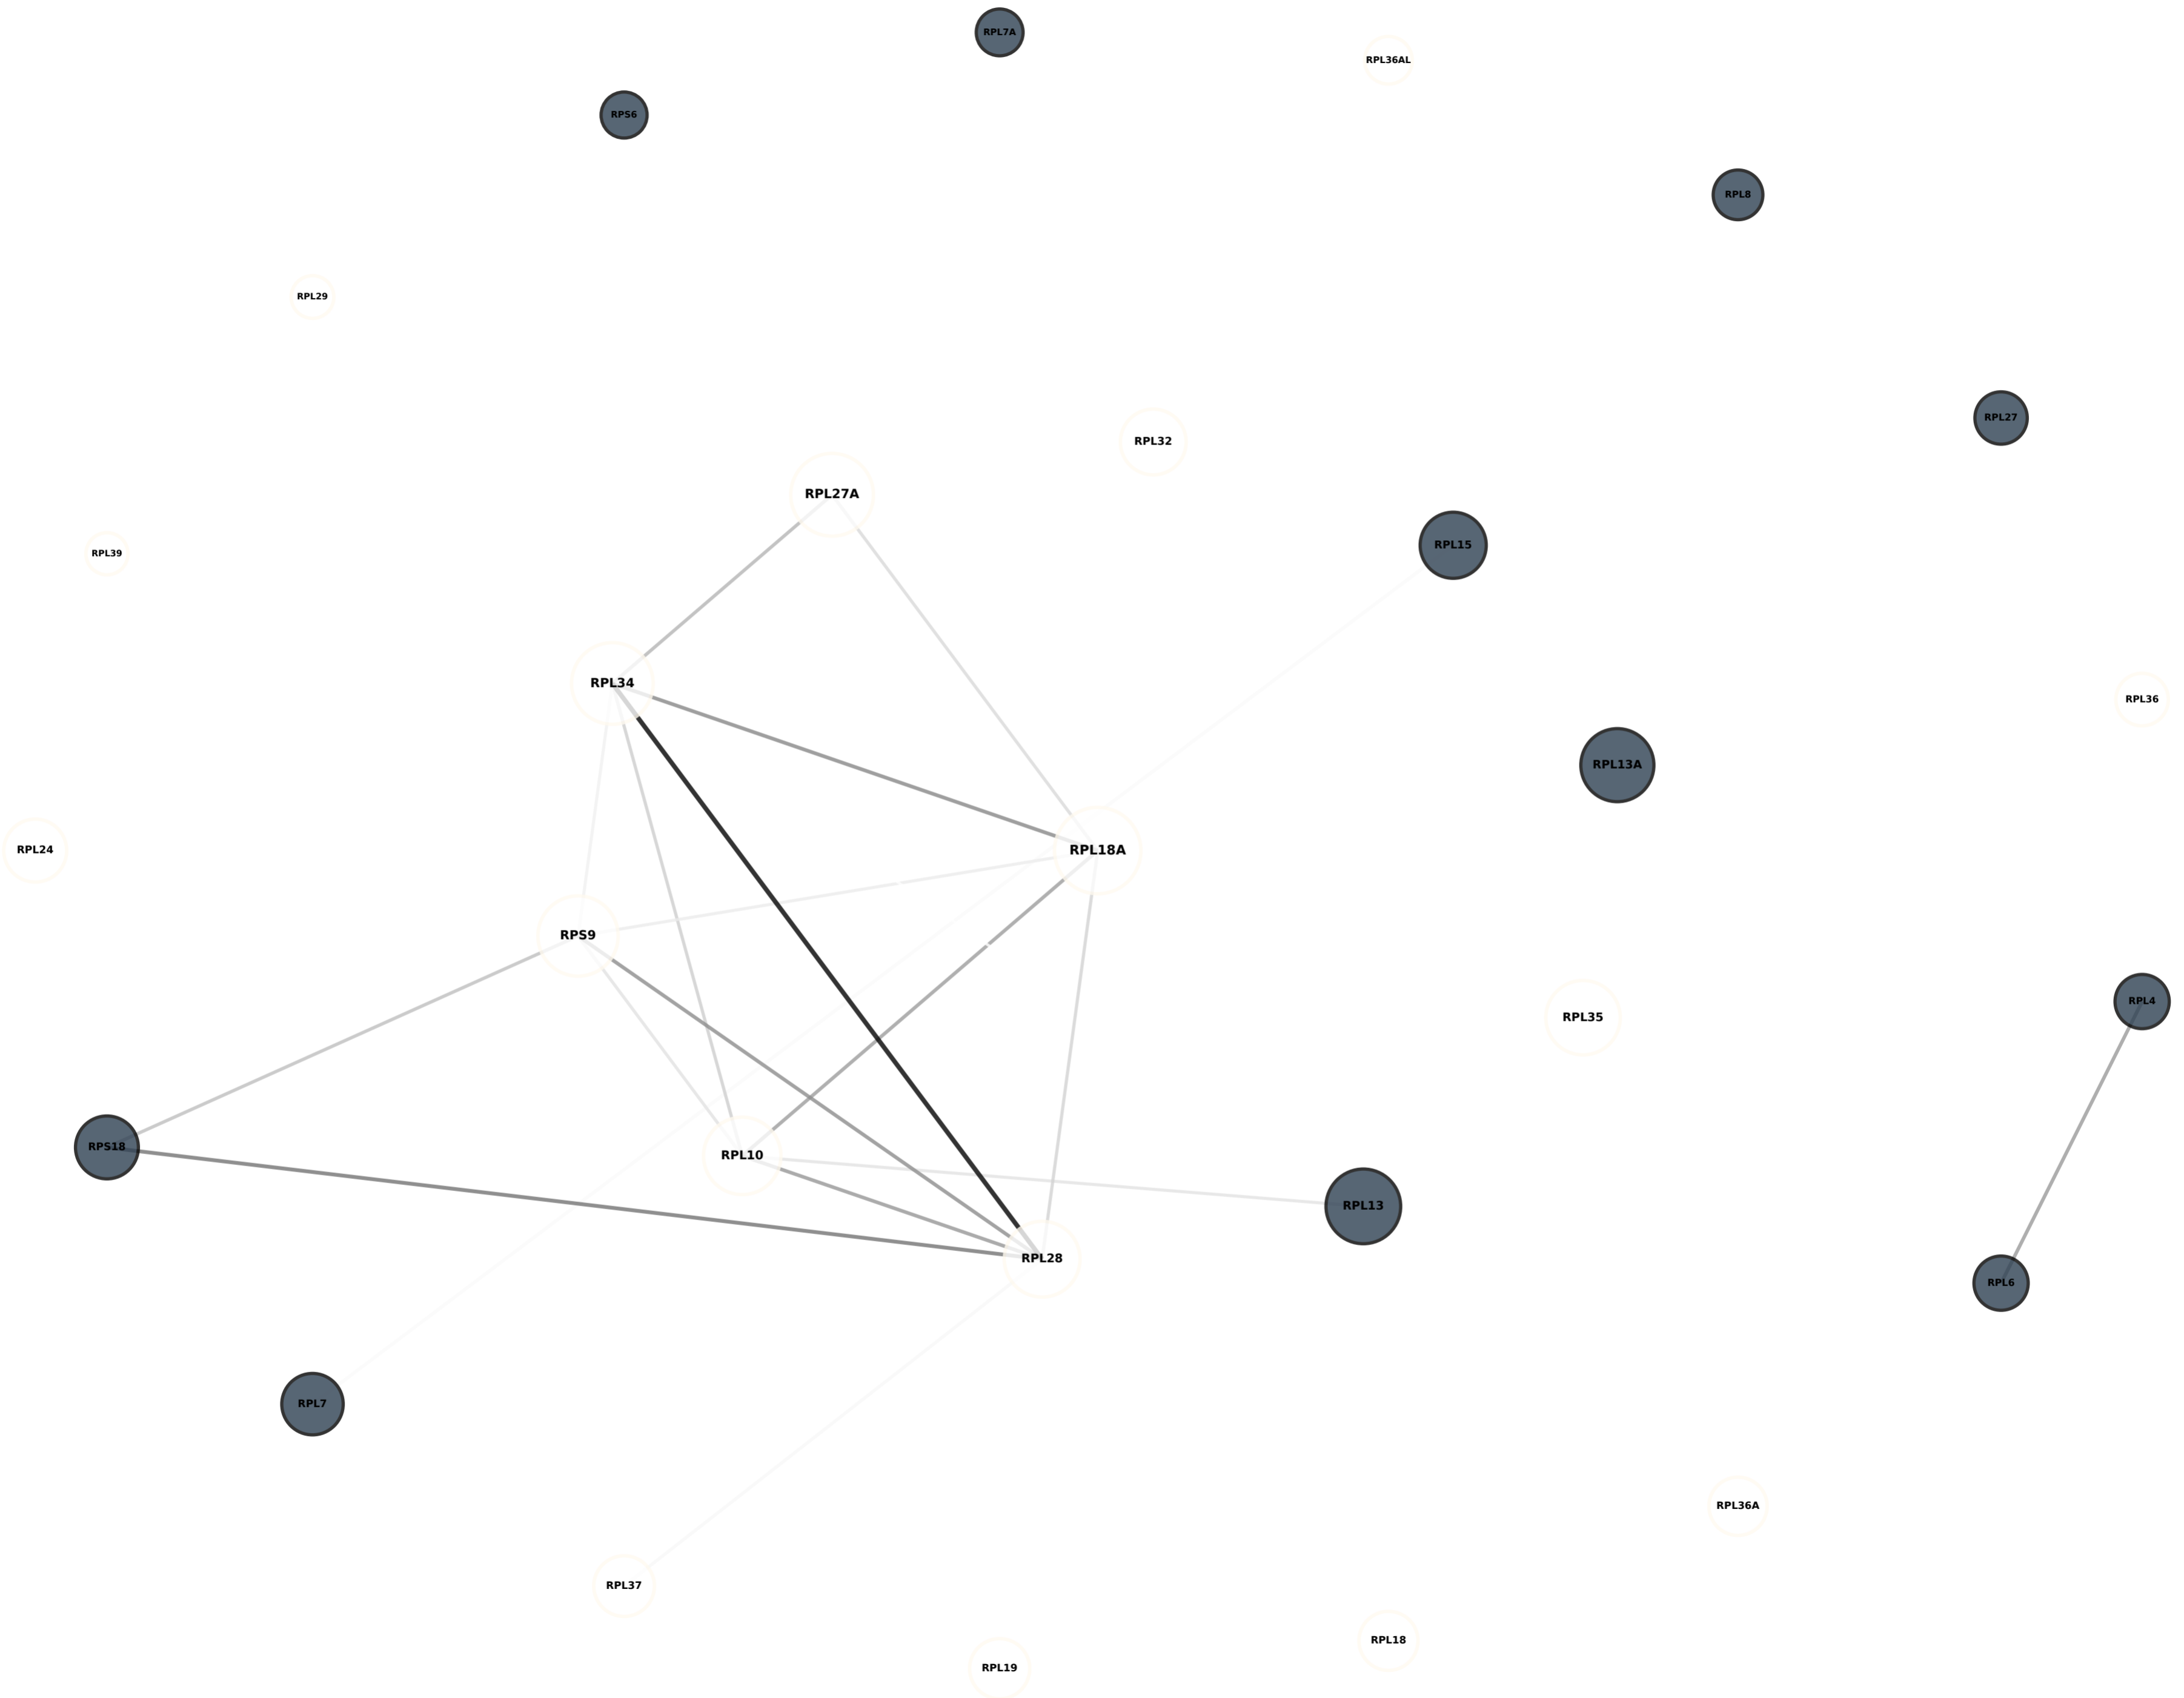

**GO Analysis on TMT AD Network Modules.** Gene ontology (GO) analysis was performed to gain insight into the biological meaning of each AD protein network module. Enrichment for a given ontology is shown by z score.



**TMT AD Network Module Eigenprotein Levels.**  $n=106$  control, 200 AsymAD, 182 AD. Differences among case groups were assessed by one-way ANOVA with Tukey test. Boxplots represent the median, 25<sup>th</sup>, and 75<sup>th</sup> percentiles, and box hinges represent the interquartile range of the two middle quartiles within a group. Datapoints up to 1.5 times the interquartile range from box hinge define the extent of whiskers (error bars).

**TMT AD Network Module Protein Graphs and Overlap with Amyloid- $\beta$  Plaque and Tau Neurofibrillary Tangle Proteins.** The size of each circle indicates the relative eigenprotein correlation value (kME) in each network module. Those proteins with the largest kME are considered “hub” proteins within the module, and explain the largest variance in module expression. Lines represent weighted adjacency values between proteins. Proteins colored orange are consistently found associated with amyloid- $\beta$  plaques. Proteins colored dark blue are found to be associated with tau neurofibrillary tangles (NFTs). Proteins colored green are found to be associated with both plaques and tangles.
